# Supplementary material for: A Molecular Phylogeny of the Chalcidoidea (Hymenoptera)
Source: PLoS One. 2011 Nov 3;6(11):e27023. doi: 10.1371/journal.pone.0027023 (PMC3207832; doi:10.1371/journal.pone.0027023)
Supplement: Nexus File S1 — Chalcidoidea SSME dataset. (NEX) [file pone.0027023.s003.nex]

#NEXUS

[Munro, J.B., Heraty, J., Burks, R.A., Hawks, D., Mottern, J.L., Cruaud, A., 
Rasplus, J.-Y., Jansta, P., in prep. A Molecular Phylogeny of the Chalcidoidea 
(Hymenoptera). PLoS One.]

Begin DATA;
	Dimensions ntax=722
 nchar=3917; 
	Format
	  datatype = DNA
	  missing = ? 
	  gap = - 
	  interleave 
	  symbols = "0123456789acefgijlopqtuxz#$%^&*+`|\/!@~"; 

	Matrix

[18Sa                                                     H9         H17      H9’          H27            H39         H47                H61                     H61’              H113                 H122          H143          H143’     H144                      H144’                    H184a             H184a’         H184b_1                     H184b_2                H184b_2’                         H184_b1’              H198                H198’             H122’                  H240                            H240’              H289              H289’    H113’        H316                H316’     H339        H339’        H47’                H367              H367’          H39’  ]
[                                                                                                                                                                                                                                                                                                                                                                                                                                                                                                                                                                                                                                                                                                                     ]
[                                                   ...  (((((  ...  (((  .  )))))  .  (((.(((((((  .  ((((((((  (..(..(((.(((  ..  ((...(((....(((  .......  )))...)))))  ......  (((  ......  ((((((((..((....((((  ..((..  ....  ..))  ((((....(((((((  .....  ))))))).....))))  .........  ((((((((((  ....  ))))))))))  .... (((((    ..............  ((((((.((((((  ......  ))))))..))))))  ..................  )))))  ...........  ((((.((((  ......  ))))))))  ...  ))))...))))))))))  (((..(.(((....((((((((  .......  ))))))))))).....))))  ... ((((((((  ....  ))))...))))  )))    .    ((((((  ..........  ))))))  .  ((((  ....  ))))  ...  ))))))))  .....  (.(((...(((((  ...  ))))).))))  .  )).))))))]
Aphanogmus_sp_D1499                                 ---  -----  ---  ---  -  -----  -  -----------  -  --------  -------------  --  ---------------  -------  -----------  ------  ---  ------  --------------------  ------  ----  ----  ---------------  -----  ----------------  ---------  ----------  ----  ----------  ---- -----    --------------  -------------  ------  --------------  ------------------  -----  -----------  ---------  ------  --------  ---  -----------------  ----------------------  -------  --------------------  --- --------  ----  -----------  ---    -    ------  ----------  ------  -  ----  ----  ----  ---  --------  -----  -------------  ---  ----------  -  ---------
Ceraphron_bispinosus_HymAToL                        ---  -----  ---  ---  -  -----  -  -----------  -  --------  -----AGCCATGC  AT  GTCTCAGTGCAAGCC  AAATTAA  GGTGAAACCAC  GAATGG  CTC  ATTAAA  TCAGTTATGGTTCCTTAGAT  CGTACC  CACA  TTTA  CTTGGATAACTGTGG  TAATT  CTAGAGCTAATACATG  CAAACCAGA  GTCCCTGCCA  GAGA  TGGCGGGGAC  GCTT TTATT    AGATCAAAACCAAT  CGGTGG-CGGG--  ct--tg  --CTCGT-CCACCG  TTTACCTTGGTGACTCTG  AATAA  CTTTGTGCTGA  TCGCATGGT  CTC-GC  ACCGGCGA  CGC  ATCTTTCAAATGTCTGC  CTTATCAACTGTCGATGGTAGG  TTCTGCG  CCTACCATGGTTGTAACGGG  TAA CGGGGAAT  CAGG  GTTCGATTCCG  GAG    A    GGGAGC  CTGAGAAACG  GCTACC  A  CATC  CAAG  GAAG  GCA  GCAGGCGC  GCAAA  TTACCCACTCCCG  GCA  CGGGGAGGTA  G  TGACGAAAA
Ceraphron_sp_D1495                                  ---  -----  ---  ---  -  -----  -  -----------  -  --------  -------------  --  ---------------  -------  -----------  ------  ---  ------  --------------------  ------  ----  ----  ---------------  -----  ----------------  ---------  ----------  ----  ----------  ---- -----    --------------  -------------  ------  --------------  ------------------  -----  -----------  ---------  ------  --------  ---  -----------------  ----------------------  -------  --------------------  --- --------  ----  -----------  ---    -    ------  ----------  ------  -  ----  ----  ----  ---  --------  -----  -------------  ---  ----------  -  ---------
Lagynodes_sp_HymAToL                                ---  -----  ---  ---  -  -----  -  -----------  -  --------  -------------  --  ---------------  -------  -----------  ------  ---  ------  --------------------  ------  ----  ----  ---------------  -----  ----------------  ---------  ----------  ----  ----------  ---- -----    --------------  -------------  ------  --------------  ------------------  -----  -----------  ---------  ------  --------  ---  -----------------  ----------------------  -------  --------------------  --- --------  ----  -----------  ---    -    ------  ----------  ------  -  ----  ----  ----  ---  --------  -----  --------TCCCG  GCA  CGGGGAGGTA  G  TGACGAAAA
Dendrocerus_sp_D1498                                ---  -----  ---  ---  -  -----  -  -----------  -  --------  -------------  --  ---------------  -------  -----------  ------  ---  ------  --------------------  ------  ----  ----  ---------------  -----  ----------------  ---------  ----------  ----  ----------  ---- -----    --------------  -------------  ------  --------------  ------------------  -----  -----------  ---------  ------  --------  ---  -----------------  ----------------------  -------  --------------------  --- --------  ----  -----------  ---    -    ------  ----------  ------  -  ----  ----  ----  ---  --------  -----  -------------  ---  ----------  -  ---------
Megaspilus_fuscipennis_HymAToL                      ---  -----  -GA  TCC  T  GCCAG  T  AGTCATATGCT  T  GTCTCAAA  GATTAAGCCATGC  AT  GTCTCAGTGCAAGCC  AAATTAA  GGTGAAACCGC  GAATGG  CTC  ATTAAA  TCAGTTATGGTTCCTTAGAT  CGTACC  CACA  TTTA  CTTGGATAACTGTGG  TAATT  CTAGAGCTAATACATG  CAAACCAGA  GTTCCGACCA  GAGA  TGGAAGGAAC  GCTT TTATT    AGATCAAAACCAAT  CGGTGG-CGGG--  tc--cg  --CTCGT-CCATCG  TTTACCTTGGTGACTCTG  AATAA  CTTTGTGCTGA  TCGCATGGT  CTC-GC  ACCGGCGA  CGC  ATCTTTCAAATGTCTGC  CTTATCAACTGTCGATGGTAGG  TTCTGCG  CCTACCATGGTAGTAACGGG  TAA CGGGGAAT  CAGG  GTTCGATTCCG  GAG    A    GGGAGC  CTGAGAAACG  GCTACC  A  CATC  CAAG  GAAG  GCA  GCAGGCGC  GCAAA  TTACCCACTCCCG  GCA  CGGGGAGGTA  G  TGACGAAAA
Nixonia_watshami_OSUC188493                         ---  -----  ---  ---  -  -----  -  -----------  -  --------  -------------  --  ---------------  -------  -----------  ------  ---  ------  --------------------  ------  ----  ----  ---------------  -----  ----------------  ---------  ----------  ----  ----------  ---- -----    --------------  -------------  ------  --------------  ------------------  -----  -----------  ---------  ------  --------  ---  -----------------  ----------------------  -------  --------------------  --- --------  ----  -----------  ---    -    ------  ----------  GCTACC  A  CATC  CAAG  GAAG  GCA  GCAGGCGC  GCAAA  TTACCCACTCCCG  GCA  CGGGGAGGTA  G  TGACGAAAA
Macroteleia_sp_D1486                                ---  -----  ---  ---  -  -----  -  -----------  -  --------  -------------  --  ---------------  -------  -----------  ------  ---  ------  --------------------  ------  ----  ----  ---------------  -----  ----------------  ---------  ----------  ----  ----------  ---- -----    --------------  -------------  ------  --------------  ------------------  -----  -----------  ---------  ------  --------  ---  -----------------  ----------------------  -------  --------------------  --- --------  ----  -----------  ---    -    ------  ----------  ------  -  ----  ----  ----  ---  --------  -----  -------------  ---  ----------  -  ---------
Telenomus_sp_2_HymAToL                              ---  -----  ---  ---  -  -----  -  -----------  -  --------  -------------  --  ---------------  -------  -----------  ------  ---  ------  --------------------  ------  ----  ----  ---------------  -----  ----------------  ---------  ----------  ----  ----------  ---- -----    --------------  -------------  ------  --------------  ------------------  -----  -----------  ---------  ------  --------  ---  -----------------  ----------------------  -------  --------------------  --- --------  ----  -----------  ---    -    ------  ----------  ------  -  ----  ----  ----  ---  --------  -----  -------------  ---  ----------  -  ---------
Telenomus_sp_1_D1489                                ---  -----  ---  ---  -  -----  -  -----------  -  --------  -------------  --  ---------------  -AATTAA  GGTGAAACCGC  GAATGG  CTC  ATTAAA  TCAGTTATGGTTCCTTAGAT  CGTACC  AACA  TTTA  CTTGGATAACTGTGG  TAATT  CTAGAGCTAATACATG  CAAACCAGA  GTTCCGACCA  GAGA  TGGAAGGAAT  GCTT TTATT    AGATCAAAACCAAT  CGGTGG-CGGGT-  gc--aa  -GCCCGT-CCACCG  TTCATTTTGGTGACTCTG  AATAA  CTTTGTGCTGA  TCGCATGGT  CTC-GT  ACCGGCGA  CGA  ATCTTTCAAATGTCTGC  CTTATCAACTGTCGATGGTAGG  TTCTGTG  CCTACCATGGTTGTAACGGG  TAA CGGGGAAT  CAGG  GTTCGATTCCG  GAG    A    GGGAGC  CTGAGAAACG  GCTACC  A  CATC  CAAG  GAAG  GCA  GCAGGCGC  GCAAA  TTACCCACTCCCG  GCA  CGGGGAGGTA  G  TGACGAAAA
Archaeoteleia_mellea_D2031                          TAC  CTGGT  TGA  TCC  T  GCCAG  T  AGTCATATGCT  T  GTCTCAAA  GATTAAGCCATGC  AT  GTCTCAGTGCATGCC  GAATTAA  GGTGAAACCGC  GAATGG  CTC  ATTAAA  TCAGTTATGGTTCCTTAGAT  CGTACC  CACA  TTTA  CTTGGATAACTGTGG  TAATT  CTAGAGCTAATACATG  CAAACCAGA  GTTCCGACCA  GAGA  TGGAAGGAAT  GCTT TTATT    AGATCAAAACCAAT  CGGTGG-CGGG--  tttatt  --CTCGT-CCACCG  TTTGTCTTGATGACTCTG  AATAA  CTTTTTGCTGA  TCGCACGGT  CTC-GT  ACCGGCGA  CGA  ATCTTTCAAATGTCTGC  CTTATCAACTGTCGATGGTAGG  TTCTGCG  CCTACCATGGTTGTAACGGG  TAA CGGGGAAT  CAGG  GTTCGATTCCG  GAG    A    GGGAGC  CTGAGAAACG  GCTACC  A  CATC  CAAG  GAAG  GCA  GCAGGCGC  GCAAA  TTACCCACTCCCG  GCA  CGGGGAGGTA  G  TGACGAAAA
Archaeoteleia_sp_2_D2030                            ---  -----  ---  ---  -  -----  -  -----------  -  --------  -------------  --  ---------------  -------  -----------  ------  ---  ------  --------------------  ------  ----  ----  ---------------  -----  ----------------  ---------  ----------  ----  ----------  ---- -----    --------------  -------------  ------  --------------  ------------------  -----  -----------  ---------  ------  --------  ---  -----------------  ----------------------  -------  --------------------  --- --------  ----  -----------  ---    -    ------  ----------  ------  -  ----  ----  ----  ---  --------  -----  -------------  ---  ----------  -  ---------
Archaeoteleia_sp_1_M293                             ---  -----  ---  ---  -  -----  -  -----------  -  --------  -------------  --  ---------------  -------  -----------  ------  ---  ------  --------------------  ------  ----  ----  ---------------  -----  ----------------  ---------  ----------  ----  ----------  ---- -----    --------------  -------------  ------  --------------  ------------------  -----  -----------  ---------  ------  --------  ---  -----------------  ----------------------  -------  --------------------  --- --------  ----  -----------  ---    -    ------  ----------  ------  -  ----  ----  ----  ---  --------  -----  -------------  ---  ----------  -  ---------
Aphanomerus_sp_M246                                 ---  -----  ---  ---  -  -----  -  -----------  -  --------  -------------  --  ---------------  -------  -----------  ------  ---  ------  --------------------  ------  ----  ----  ---------------  -----  ----------------  ---------  ----------  ----  ----------  ---- -----    --------------  -------------  ------  --------------  ------------------  -----  -----------  ---------  ------  --------  ---  -----------------  ----------------------  -------  --------------------  --- --------  ----  -----------  ---    -    ------  ----------  ------  -  ----  ----  ----  ---  --------  -----  -------------  ---  ----------  -  ---------
Gryon_sp_D2741                                      TAC  CTGGT  TGA  TCC  T  GCCAG  T  AGTCATATGCT  T  GTCTCAAA  GATTAAGCCATGC  AT  GTCTCAGTACATGCC  GAATTAA  GGTGAAACCGC  GAATGG  CTC  ATTAAA  TCAGTTATGGTTCCTTAGAT  CGTACC  AACA  TTTA  CTTGGATAACTGTGG  TAATT  CTAGAGCTAATACATG  CAAACCAGA  GTTCCGACCA  GAGA  TGGAAGGAAT  GCTT TTATT    AGATCAAAACCAAT  CGGTGG-CGGGC-  gc--aa  -GCTCGT-CCATCG  TTCATTTTGGTGACTCTG  AATAA  CTTTGTGCTGA  TCGCATGGT  CTC-GT  ACCGGCGA  CGA  ATCTTTCAAATGTCTGC  CTTATCAACTGTCGATGGTAGG  TTCTGTG  CCTACCATGGTTGTAACGGG  TAA CGGGGAAT  CAGG  GTTCGATTCCG  GAG    A    GGGAGC  CTGAGAAACG  GCTACC  A  CATC  CAAG  GAAG  GCA  GCAGGCGC  GCAAA  TTACCCACTCCCG  GCA  CGGGGAGGTA  G  TGACGAAAA
Synopeas_sp_M441                                    ---  -----  ---  ---  -  -----  -  -----------  -  --------  -------------  --  ---------------  -------  -----------  ------  ---  ------  --------------------  ------  ----  ----  ---------------  -----  ----------------  ---------  ----------  ----  ----------  ---- -----    --------------  -------------  ------  --------------  ------------------  -----  -----------  ---------  ------  --------  ---  -----------------  ----------------------  -------  --------------------  --- --------  ----  -----------  ---    -    ------  ----------  ------  -  ----  ----  ----  ---  --------  -----  -------------  ---  ----------  -  ---------
Platygaster_sp_HymAToL                              TAC  CTGGT  TGA  TCC  T  GCCAG  T  AGTCATATGCT  T  GTCTCAAA  GATTAAGCCATGC  AT  GTCTCAGTGCATGCC  GAAATAA  GGTGAAACCGC  GAATGG  CTC  ATTAAA  TCAGTTATGATTCCTTTGAC  ACTACC  AACA  TTTA  CTTGGATAACTGTGG  TAATT  CTAGAGCTAATACATG  CAAACTTGA  GTCCCGACCA  GAGA  TGGAAGGGAC  GCTT TTATT    AGATCAAAACCAAT  CGGTAGTCGGGC-  tt--cg  -GCTCGT-TCTCCG  TTTGTTATGATGACTCTG  GATAA  CTTTGTGCTGA  TCGCACGGT  CTTGGT  GCCGGCGA  CGA  ATCATTCAAATCTCTGC  CTTATCAACTGTCGATGGTAGG  CTCCACG  CCTACCATGGTTGTAACGGG  TAA CGGGGAAT  CAGG  GTTCGATTCCG  GAG    A    GGGAGC  CTGAGAAACG  GCTACC  A  CATC  TAAG  GAAG  GCA  GCAGGCGC  GCAAA  TTACCCACTCCCG  GCA  CGGGGAGGTA  G  TGACGAAAA
Proplatygaster_sp_HymAToL                           ---  -----  ---  ---  -  -----  -  -----------  -  --------  -------------  --  GTCTCAGTGCATGCC  GAATTAA  GGTGAAACCGC  GAATGG  CTC  ATTAAA  TCAGTTATGGTTCCTTAGAT  CGTACT  CACA  TTTA  CTTGGATAACTGTGG  TAATT  CTAGAGCTAATACATG  CAAACCAGA  GTCCCGACCA  GAGA  TGGGAGGGAC  GCTT TTATT    AGATCAAAACCAAT  CGACGGTCGGG--  g---tt  --CCCGT-TCGCCG  TTTGTCATGATGACTCTG  AATAA  CTTTGTGCTGA  TCGCACGGT  CTTGGC  ACCGGCGA  CGA  ATCTTTCAAATGTCTGC  CTTATCAACTGTCGATGGTAGG  TTCTGCG  CCTACCATGGTTGTAACGGG  TAA CGGGGAAT  CAGG  GTTCGATTCCG  GAG    A    GGGAGC  CTGAGAAACG  GCTACC  A  CATC  CAAG  GAAG  GCA  GCAGGCGC  GCAAA  TTACCCACTCCCG  GCA  CGGGGAGGTA  G  TGACGAAAA
Diplolepis_sp_HymAToL                               ---  -----  ---  TCC  T  GCCAG  T  AGTCATATGCT  T  GTCTCAAA  GATTAAGCCATGC  AT  GTCTCAGTGCATGCC  GAATTAA  GGTGAAACCGC  GAATGG  CTC  ATTAAA  TCAGTTATGGTTCCTTAGAT  CGTACC  CACA  TTTA  CTTGGATAACTGTGG  TAATT  CTAGAGCTAATACATG  CAAACCAGA  GTTCCGACCA  GAGA  TGGAAGGAAC  GCTT TTATT    AGATCAAAACCAAT  CGGTGG-CGGGT-  t---ct  -GCTCGT-CCACCG  TTTACCTTGGTGACTCTG  AATAA  CTTTGTGCTGA  TCGCACGGT  CTC-GT  ACCGGCGA  CGA  ATCTTTCAAATGTCTGC  CTTATCAACTGTCGATGGTAGG  TTCTGCG  CCTACCATGGTTGTAACGGG  TAA CGGGGAAT  CAGG  GTTCGATTCCG  GAG    A    GGGAGC  CTGAGAAACG  GCTACC  A  CATC  CAAG  GAAG  GCA  GCAGGCGC  GCAAA  TTACCCACTCCCG  GCA  CGGGGAGGTA  G  TGACGAAAA
Periclistus_sp_HymAToL                              TAC  CTGGT  TGA  TCC  T  GCCAG  T  AGTCATATGCT  T  GTCTCAAA  GATTAAGCCATGC  AT  GTCTCAGTGCACGCC  AAATTAA  GGTGAAACCGC  GAATGG  CTC  ATTAAA  TCAGTTATGGTTCCTTAGAT  CGTACC  CACA  TTTA  CTTGGATAACTGTGG  TAATT  CTAGAGCTAATACATG  CAAACCAGA  GTTCCGACCA  GAGA  TGGAAGGAAC  GCTT TTATT    AGATCAAAACCAAT  CGGTGG-CGGGT-  t---ct  -GCCTGT-CCACCG  TTTACCTTGGTGACTCTG  AATAA  CTTTGTGCTGA  TCGCACGGT  CTT-GA  ACCGGCGA  CGA  ATCTTTCAAATGTCTGC  CTTATCAACTGTCGATGGTAGG  TTCTGCG  CCTACCATGGTTGTAACGGG  TAA CGGGGAAT  CAGG  GTTCGATTCCG  GAG    A    GGGAGC  CTGAGAAACG  GCTACC  A  CATC  CAAG  GAAG  GCA  GCAGGCGC  GCAAA  TTACCCACTCCCG  GCA  CGGGGAGGTA  G  TGACGAAAA
Anacharis_sp_HymAToL                                ---  ----T  TGA  TCC  T  GCCAG  T  AGTCATATGCT  T  GTCTCAAA  GATTAAGCCATGC  AT  GTCTCAGTGCATGCC  AAATTAA  GGTGAAACCGC  GAATGG  CTC  ATTAAA  TCAGTTATGGTTCCTTAGAT  CGTACC  CACA  TTTA  CTTGGATAACTGTGG  TAATT  CTAGAGCTAATACATG  CAAACCAGA  GTTCTGACCA  GAGA  TGGAAGGAAC  GCTT TTATT    AGATCAAAACCAAT  CGGTGG-CTTGC-  a---tt  -GCATGT-CCACCG  TTTACCTTGGTGACTCTG  AATAA  CTTTGTGCTGA  TCGCACGGT  CTT-GT  ACCGGCGA  CGC  ATCTTTCAAATGTCTGC  CTTATCAACTGTCGATGGTAGG  TTCTGCG  CCTACCATGGTTGTAACGGG  TAA CGGGGAAT  CAGG  GTTCGATTCCG  GAG    A    GGGAGC  CTGAGAAACG  GCTACC  A  CATC  CAAG  GAAG  GCA  GCAGGCGC  GCAAA  TTACCCACTCCCG  GCA  CGGGGAGGTA  G  TGACGAAAA
Melanips_sp_HymAToL                                 TAC  CTGGT  TGA  TCC  T  GCCAG  T  AGTCATATGCT  T  GTCTCAAA  GATTAAGCCATGC  AT  GTCTCAGTACATGCC  GAATTAA  GGTGAAACCGC  GAATGG  CTC  ATTAAA  TCAGTTATGGTTCCTTAGAT  TGTACC  CACA  -TTA  CTTGGATAACTGTGG  TAATT  CTAGAGCTAATACATG  CAAACCAGA  GTTCTGACCA  GAGA  TGGGAGGAAC  GCTT TTATT    AGATCAAAACCAAT  CGGTGG-CGGG--  ct--tg  --CCTGT-CCACCG  TTTATTTTGGTGACTCTG  AATAA  CTTTGTGCTGA  TCGCACGGT  CTT-GT  ACCGGCGA  CAA  ATCTTTCAAATGTCTGC  CTTATCAACTGTCGATGGTAGG  TTCTGCG  CCTACCATGGTTGTAACGGG  TAA CGGGGAAT  CAGG  GTTCGATTCCG  GAG    A    GGGAGC  CTGAGAAACG  GCTACC  A  CATC  CAAG  GAAG  GCA  GCAGGCGC  GCAAA  TTACCCACTCCCG  GCA  CGGGGAGGTA  G  TGACGAAAA
Paraspicera_sp_MB387                                ---  -----  ---  ---  -  -----  -  -----------  -  --------  -------------  --  ---------------  -------  -----------  ------  ---  ------  --------------------  ------  ----  ----  ---------------  -----  ----------------  ---------  ----------  ----  ----------  ---- -----    --------------  -------------  ------  --------------  ------------------  -----  -----------  ---------  ------  --------  ---  -----------------  ----------------------  -------  --------------------  --- --------  ----  -----------  ---    -    ------  ----------  ------  -  ----  ----  ----  ---  --------  -----  -------------  ---  ----------  -  ---------
Parnips_nigripes_HymAToL                            ---  -----  -GA  TCC  T  GCCAG  T  AGTCATATGCT  T  GTCTCAAA  GATTAAGCCATGC  AT  GTCTAAGTACATGCC  GAATTAA  GGTGAAACCGC  GAATGG  CTC  ATTAAA  TCAGTTATGGTTCCTTAGAT  CGTACC  CACA  TTTA  CTTGGATAACTGTGG  TAATT  CTAGAGCTAATACATG  CAAACCAGA  GTTCCGACCA  GAGA  TGGAAGGAAC  GCTT TTATT    AGATCAAAACCAAT  CGGTGG-CGGGT-  t---tt  -GCTCGT-CCACCG  TTTACTTTGGTGACTCTG  AATAA  CTTTGTGCTGA  TCGCAGGGT  CTT-GT  ACCGGCGA  CGA  ATCTTTCAAATGTCTGC  CTTATCAACTGTCGATGGTAGG  TTCTGCG  CCTACCATGGTTGTAACGGG  TAA CGGGGAAT  CAGG  GTTCGATTCCG  GAG    A    GGGAGC  CTGAGAAACG  GCTACC  A  CATC  CAAG  GAAG  GCA  GCAGGCGC  GCAAA  TTACCCACTCCCG  GCA  CGGGGAGGTA  G  TGACGAAAA
Ibalia_sp_1_MJY120                                  TAC  CTGGT  TGA  TCC  T  GCCAG  T  AGTCATATGCT  T  GTCTCAAA  GATTAAGCCATGC  AT  GTCTCAGTGCATGCC  AAATTAA  GGTGAAACCGC  GAATGG  CTC  ATTAAA  TCAGTTATGGTTCCTTAGAT  CGTACC  CACA  TTTA  CTTGGATAACTGTGG  TAATT  CTAGAGCTAATACATG  CAAACCAGA  GTTCCGACCA  GAGA  TGGAAGGAAC  GCTT TTATT    AGATCAAAACCAAT  CGGTGG-CGGGT-  t---ct  -GCTCGT-CCACCG  TTTACCTTGGTGACTCTG  AATAA  CTTTGTGCTGA  TCGCACGGT  CTT-GT  ACCGGCGA  CGC  ATCTTTCAAATGTCTGC  CTTATCAACTGTCGATGGTAGG  TTCTGCG  CCTACCATGGTTGTAACGGG  TAA CGGGGAAT  CAGG  GTTCGATTCCG  GAG    A    GGGAGC  CTGAGAAACG  GCTACC  A  CATC  CAAG  GAAG  GCA  GCAGGCGC  GCAAA  TTACCCACTCCCG  GCA  CGGGGAGGTA  G  TGACGAAAA
Ibalia_sp_2_HymAToL                                 TAC  CTGGT  TGA  TCC  T  GCCAG  T  AGTCATATGCT  T  GTCTCAAA  GATTAAGCCATGC  AT  GTCTCAGTGCATGCC  AAATTAA  GGTGAAACCGC  GAATGG  CTC  ATTAAA  TCAGTTATGGTTCCTTAGAT  CGTACC  CACA  TTTA  CTTGGATAACTGTGG  TAATT  CTAGAGCTAATACATG  CAAACCAGA  GTTCTGACCA  GAGA  TGGAAGGAAC  GCTT TTATT    AGATCAAAACCAAT  CGGTGG-CGGGT-  a---tc  -GCTCGT-CCACCG  TTTGCCTTGGTGACTCTG  AATAA  CTTTGTGCTGA  TCGCACGGT  CTC-GC  ACCGGCGA  CGC  ATCTTTCAAATGTCTGC  CTTATCAACTGTCGATGGTAGG  TTCTGCG  CCTACCATGGTTGTAACGGG  TAA CGGGGAAT  CAGG  GTTCGATTCCG  GAG    A    GGGAGC  CTGAGAAACG  GCTACC  A  CATC  CAAG  GAAG  GCA  GCAGGCGC  GCAAA  TTACCCACTCCCG  GCA  CGGGGAGGTA  G  TGACGAAAA
Paramblynotus_sp_HymAToL                            TAC  CTGGT  TGA  TCC  T  GCCAG  T  AGTCATATGCT  T  GTCTCAAA  GATTAAGCCATGC  AT  GTCTCAGTACATGCC  AAATTAA  GGTGAAACCGC  GAATGG  CTC  ATTAAA  TCAGTTATGGTTCCTTAGAT  CGTACC  CACA  -TTA  CTTGGATAACTGTGG  TAATT  CTAGAGCTAATACATG  CAAACCAGA  GTTCCGACCA  GAGA  TGGAAGGAAC  GCTT TTATT    AGATCAAAACCAAT  CGGTGG-CGGG--  tt--cg  --CTCGT-CCACCG  TTTACCTTGGTGACTCTG  AATAA  CTTTGTGCTGA  TCGCACGGT  CTC-GC  ACCGGCGA  CGC  ATCTTTCAAATGTCTGC  CTTATCAACTGTCGATGGTAGG  TTCTGCG  CCTACCATGGTTGTAACGGG  TAA CGGGGAAT  CAGG  GTTCGATTCCG  GAG    A    GGGAGC  CTGAGAAACG  GCTACC  A  CATC  CAAG  GAAG  GCA  GCAGGCGC  GCAAA  TTACCCACTCCCG  GCA  CGGGGAGGTA  G  TGACGAAAA
Helorus_sp_HymAToL                                  TAC  CTGGT  TGA  TCC  T  GCCAG  T  AGTCATATGCT  T  GTCTCAAA  GATTAAGCCATGC  AT  GTCTCAGTGCATGCC  GAATTAA  GGTGAAACCGC  GAATGG  CTC  ATTAAA  TCAGTTATGGTTCCTTAGAT  CGTACC  CACA  TTTA  CTTGGATAACTGTGG  TAATT  CTAGAGCTAATACATG  CAAACTAGA  GTTCCGACCA  GAGA  TGGAAGGAAC  GCTT TTATT    AGATCAAAACCAAT  CGATGG-CGGG--  ct--tg  --CCTGT-CCACCG  TTTGTCTTGGTGACTCTG  AATAA  CTTTGTGCTGA  TCGCACGGT  CTC-GT  ACCGGCGA  CGC  ATCTTTCAAATGTCTGC  CTTATCAACTGTCGATGGTAGG  TTCTGCG  CCTACCATGGTTGTAACGGG  TAA CGGGGAAT  CAGG  GTTCGATTCCG  GAG    A    GGGAGC  CTGAGAAACG  GCTACC  A  CATC  CAAG  GAAG  GCA  GCAGGCGC  GCAAA  TTACCCACTCCCG  GCA  CGGGGAGGTA  G  TGACGAAAA
Exallonyx_sp_D1496                                  ---  -----  ---  ---  -  -----  -  -----------  -  --------  -------------  --  ---------------  -------  -----------  ------  ---  ------  --------------------  ------  ----  ----  ---------------  -----  ----------------  ---------  ----------  ----  ----------  ---- -----    --------------  -------------  ------  --------------  ------------------  -----  -----------  ---------  ------  --------  ---  -----------------  ----------------------  -------  --------------------  --- --------  ----  -----------  ---    -    ------  ----------  ------  -  ----  ----  ----  ---  --------  -----  -------------  ---  ----------  -  ---------
Exallonyx_sp_HymAToL                                TAC  CTGGT  TGA  TCC  T  GCCAG  T  AGTCATACGCT  T  GTCTCAAA  GATTAAGCCATGC  AT  GTCTCAGTGCATGCC  GTATTAA  GGTGAAACCGC  GAATGG  CTC  ATTAAA  TCAGTTATGGTTCCTTAGAT  AGTACA  AAAA  GTTA  CTTGGATAACTGTGG  TAATT  CTAGAGCTAATACATG  CAAACCAGA  GTTCCGACCA  GAGA  TGGTAGGAAC  GCTT TTATT    AGACCAAAACCAAT  CGGTGG-CGAG--  ct--tg  --CTCGT-CCACCG  TTTAACTTGGTGACTCTG  AATAA  CTTTGTGCTGA  TCGCACGGT  CTC-GT  ACCGGCGA  CGC  ATCTTTCAAATGTCTGC  CTTATCAACTGTCGATGGTAGG  CTCTGCG  CCTACCATGGTCGTAACGGG  TAA CGGGGAAT  CAGG  GTTCGATTCCG  GAG    A    GGGAGC  CTGAGAAACG  GCTACC  A  CATC  CAAG  GAAG  GCA  GCAGGCGC  GCAAA  TTACCCACTCCCG  GCA  CGGGGAGGTA  G  TGACGAAAA
Disogmus_sp_MJY123                                  ---  -----  ---  ---  -  -----  -  -----------  -  --------  -------------  --  ---------------  -------  -----------  ------  ---  ------  --------------------  ------  ----  ----  ---------------  -----  ----------------  ---------  ----------  ----  ----------  ---- -----    --------------  -------------  ------  --------------  ------------------  -----  -----------  ---------  ------  --------  ---  -----------------  ----------------------  -------  --------------------  --- --------  ----  -----------  ---    -    ------  ----------  ------  -  ----  ----  ----  ---  --------  -----  -------------  ---  ----------  -  ---------
Austroserphus_sp_HymAToL                            TAC  CTGGT  TGA  TCC  T  GCCAG  T  AGTCATATGCT  T  GTCTCAAA  GATTAAGCCATGC  AT  GTCTCAGTGCATGCC  GAATTAA  GGTGAAACCGC  GAATGG  CTC  ATTAAA  TCAGTTATGGTTCCTTGGAT  CGTACC  AAAA  GTTA  CTTGGATAACTGTGG  TAATT  CTAGAGCTAATACATG  CAAACCAGA  GTTCCGACCA  GAGA  TGGAAGGAAC  GCTT TTATT    AGATCAAAACCAAT  CGGTGG-CGGG--  ct--cg  --CTCGA-CCACCG  TTTGACTTGATGACTCTG  AATAA  CTTTGTGCTGA  TCGCACGGT  CTC-GT  ACCGGCGA  CGC  ATCTTTCAAATGTCTGC  CTTATCAACTGTCGATGGTAGG  CTCTGCG  CCTACCATGGTTGTAACGGG  TAA CGGGGAAT  CAGG  GTTCGATTCCG  GAG    A    GGGAGC  CTGAGAAACG  GCTACC  A  CATC  CAAG  GAAG  GCA  GCAGGCGC  GCAAA  TTACCCACTCCCG  GCA  CGGGGAGGTA  G  TGACGAAAA
Proctotrupes_sp_HymAToL                             TAC  CTGGT  TGA  TCC  T  GCCAG  T  AGTCATACGCT  T  GTCTCAAA  GATTAAGCCATGC  AT  GTCTCAGTGCATGCC  GAATTAA  GGTGAAACCGC  GAATGG  CTC  ATTAAA  TCAGTTATGGTTCCTTGGAT  AGTACA  AAAA  GTTA  CTTGGATAACTGTGG  TAATT  CTAGAGCTAATACATG  CAAACCAGA  GTTCCGACCA  GAGA  TGGTAGGAAC  GCTT TTATT    AGATCAAAACCAAT  CGGTGG-CGGG--  ct--cg  --CTCGT-CCACCG  TTTGACTTGGTGACTCTG  AATAA  CTTTGTGCTGA  TCGCACGGT  CTC-GT  ACCGGCGA  CGC  ATCTTTCAAATGTCTGC  CTTATCAACTGTCGATGGTAGG  CTCTGCG  CCTACCATGGTCGTAACGGG  TAA CGGGGAAT  CAGG  GTTCGATTCCG  GAG    A    GGGAGC  CTGAGAAACG  GCTACC  A  CATC  CAAG  GAAG  GCA  GCAGGCGC  GCAAA  TTACCCACTCCCG  GCA  CGGGGAGGTA  G  TGACGAAAA
Pelecinus_polyturator_HymAToL                       TAC  CTGGT  TGA  TCC  T  GCCAG  T  AGTCATATGCT  T  GTCTCAAA  GATTAAGCCATGC  AT  GTCTCAGTGCATGCC  GAATTAA  GGTGAAACCGC  GAATGG  CTC  ATTAAA  TCAGTTATGGTTCCTTGGAT  GGTACC  -A--  TTTA  CTTGGATAACTGTGG  TAATT  CTAGAGCTAATACATG  CAAACCAGA  GTTCCGACCA  GAGA  TGGAAGGAAC  GCTC TTATT    AGATCAAAACCAAT  CGGTGG-CGGG--  tt--cg  --TCCTT-CCACCG  TTTACTTTGATGACTCTG  AATAA  CCTTGTGCTGA  TCGCACGGT  CTC-GC  ACCGGCGA  CGC  ATCTTTCAAATGTCTGC  CTTATCAACTGTCGATGGTAGG  TTCTGCG  CCTACCATGGTTGTAACGGG  TGA CGGGGAAT  CAGG  GTTCGATTCCG  GAG    A    GGGAGC  CTGAGAAACG  GCTACC  A  CATC  CAAG  GAAG  GCA  GCAGGCGC  GCAAA  TTACCCACTCCCG  GCA  CGGGGAGGTA  G  TGACGAAAA
Vanhornia_eucnemidarum_HymAToL                      TAC  CTGGT  TGA  TCC  T  GCCAG  T  AGTCATATGCT  T  GTCTCAAA  GATTAAGCCATGC  AT  GTCTCAGTGCATGCC  GAATTAA  GGTGAAACCGC  GAATGG  CTC  ATTAAA  TCAGTTATGGTTCCTTAGAT  CGTACC  CAAG  TTTA  CTTGGATAACTGTGG  TAATT  CTAGAGCTAATACATG  CAAACCAGA  GTTCCGACCA  GAGA  TGGAAGGAAC  GCTT TTATT    AGATCAAAACCAAT  CGGTGG-CGGG--  ct--cg  --CTCGT-CCACCG  TTTGCCTTGGTGACTCTG  AATAA  CTTTGTGCTGA  TCGCACGGT  CTC-GC  ACCGGCGA  CGC  ATCTTTCAAATGTCTGC  CTTATCAACTGTCGATGGTAGG  TTCTGCG  CCTACCATGGTTGTAACGGG  TAA CGGGGAAT  CAGG  GTTCGATTCCG  GAG    A    GGGAGC  CTGAGAAACG  GCTACC  A  CATC  CAAG  GAAG  GCA  GCAGGCGC  GCAAA  TTACCCACTCCCG  GCA  CGGGGAGGTA  G  TGACGAAAA
Ropronia_garmani_HymAToL                            ---  -----  TGA  TCC  T  GCCAG  T  AGTCATATGCT  T  GTCTCAAA  GATTAAGCCATGC  AT  GTCTCAGTGCATGCC  GAATTAA  GGTGAAACCGC  GAATGG  CTC  ATTAAA  TCAGTTATGGTTCCTTGGAT  CGTACC  CACA  TTTA  CTTGGATAACTGTGG  TAATT  CTAGAGCTAATACATG  CAAACCAGA  GTTCCGACCG  GAGA  CGGGAGGAAC  GCTT TTATT    AGATCAAAACCAAT  CGGTGG-CGGG--  tc--cg  --CTCGT-CCACCG  TTTGCCTTGGTGACTCTG  AATAA  CTTTGTGCTGA  TCGCACGGT  CTC-GA  ACCGGCGA  CGC  ATCTTTCAAATGTCTGC  CTTATCAACTGTCGATGGTAGG  CTCTGCG  CCTACCATGGTTGTAACGGG  TAA CGGGGAAT  CAGG  GTTCGATTCCG  GAG    A    GGGAGC  CTGAGAAACG  GCTACC  A  CATC  CAAG  GAAG  GCA  GCAGGCGC  GCAAA  TTACCCACTCCCG  GCA  CGGGGAGGTA  G  TGACGAAAA
Monomachus_sp_HymAToL                               ---  -----  TGA  TCC  T  GCCAG  T  AGTCATATGCT  T  GTCTCAAA  GATTAAGCCATGC  AT  GTCTCAGTGCATGCC  GTATTAA  GGTGAAACCGC  GAATGG  CTC  ATTAAA  TCAGTTATGGTTCCTTAGAT  CGTACC  AACA  TTTA  CTTGGATAACTGTGG  TAATT  CTAGAGCTAATACATG  CAAACCAGA  GTTCCGACCA  GAGA  TGGGAGGAAC  GCTT TTATT    AGATCAAAACCAAT  CGTTGG-CGGG--  tt--ta  --CTCGT-CCAACG  TTTACTTTGATGACTCTG  AATAA  CTTTGTGCTGA  TCGCACGGT  CTC-GT  ACCGGCGA  CGC  ATCTTTCAAATGTCTGC  CTTATCAACTGTCGATGGTAGG  TTCTGCG  CCTACCATGGTTGTAACGGG  TAA CGGGGAAT  CAGG  GTTCGATTCCG  GAG    A    GGGAGC  CTGAGAAACG  GCTACC  A  CATC  CAAG  GAAG  GCA  GCAGGCGC  GCAAA  TTACCCACTCCCG  GCA  CGGGGAGGTA  G  TGACGAAAA
Maaminga_marrisi_HymAToL                            TAC  CTGGT  TGA  TCC  T  GCCAG  T  AGTCATATGCT  T  GTCTCAAA  GATTAAGCCATGC  AT  GTCTCAGTGCATGCC  GAATTAA  GGTGAAACCGC  GAATGG  CTC  ATTAAA  TCAGTTATGGTTCCTTAGAT  CGTACC  CACA  TTTA  CTTGGATAACTGTGG  TAATT  CTAGAGCTAATACATG  CAAACCAGA  GTTCCGACCA  GAGA  TGGAAGGAAC  GCTT TTATT    AGATCAAAACCAAT  CGGTGG-CGGG--  tt--cg  --CTCGT-CCACCG  TTTACCTTGGTGACTCTG  AATAA  CTTTGTGCTGA  TCGCACGGT  CTT-GT  ACCGGCGA  CGC  ATCTTTCAAATGTCTGC  CTTATCAACTGTCGATGGTAGG  TTCTGCG  CCTACCATGGTTGTAACGGG  TAA CGGGGAAT  CAGG  GTTCGATTCCG  GAG    A    GGGAGC  CTGAGAAACG  GCTACC  A  CATC  CAAG  GAAG  GCA  GCAGGCGC  GCAAA  TTACCCACTCCCG  GCA  CGGGGAGGTA  G  TGACGAAAA
Ismarus_sp_HymAToL                                  TAC  CTGGT  TGA  TCC  T  GCCAG  T  AGTCATATGCT  T  GTCTCAAA  GATTAAGCCATGC  AT  GTCTCAGTGCATGCC  AAACTAA  GGTGAAACCGC  GAATGG  CTC  ATTAAA  TCAGTTATGGTTCCTTAGAT  CGTACA  CACA  -TTA  CTTGGATAACTGTGG  TAATT  CTAGAGCTAATACATG  CAAACCAGA  GTCCCGACCA  GAGA  TGGAAGGGAC  GCTT TTATT    AGATCAAAACCAAT  CGGCGG-CGGT--  taa-tc  --ACCGT-CCGCCG  TTTACCTTGGTGACTCTG  AATAA  CTTTGAGCTGA  TCGCACGGT  CTC-GT  ACCGGCGA  CGC  ATCTTTCAAATGTCTGC  CTTATCAACTGTCGATGGTAGG  TTCTGCG  CCTACCATGGTTGTAACGGG  TAA CGGGGAAT  CAGG  GTTCGATTCCG  GAG    A    GGGAGC  CTGAGAAACG  GCTACC  A  CATC  CAAG  GAAG  GCA  GCAGGCGC  GCAAA  TTACCCACTCCCG  GCA  CGGGGAGGTA  G  TGACGAAAA
Pantolytomyia_ferruginea_HymAToL                    TAC  CTGGT  TGA  TCC  T  GCCAG  T  AGTCATATGCT  T  GTCTCAAA  GATTAAGCCATGC  AT  GTCTCAGTGCATGCC  GTATTAA  GGTGAAACCGC  GAATGG  CTC  ATTAAA  TCAGTTATGGTTCCTTAGAT  CGTACC  CACA  TTTA  CTTGGATAACTGTGG  TAATT  CTAGAGCTAATACATG  CAAACCAGA  GTTCCGACCA  GAGA  TGGAAGGAAC  GCTT TTATT    AGATCAAAACCAAT  CGGTGG-CGGGT-  tt--ac  -GCTCGT-CCACCG  TTTACCTTGGTGACTCTG  AATAA  CTTTGTGCTGA  TCGCACGGT  CTC-GC  ACCGGCGA  CGC  ATCTTTCAAATGTCTGC  CTTATCAACTGTCGATGGTAGG  TTCTGCG  CCTACCATGGTTGTAACGGG  TAA CGGGGAAT  CAGG  GTTCGATTCCG  GAG    A    GGGAGC  CTGAGAAACG  GCTACC  A  CATC  CAAG  GAAG  GCA  GCAGGCGC  GCAAA  TTACCCACTCCCG  GCA  CGGGGAGGTA  G  TGACGAAAA
Poecilopsilus_sp_HymAToL                            TAC  CTGGT  TGA  TCC  T  GCCAG  T  AGTCATATGCT  T  GTCTCAAA  GATTAAGCCATGC  AT  GTCTCAGTGCATGCC  GAATTAA  GGTGAAACCGC  GAATGG  CTC  ATTAAA  TCAGTTATGGTTCCTTAGAT  CGTACC  CACA  TTTA  CTTGGATAACTGTGG  TAATT  CTAGAGCTAATACATG  CAAACTAGA  GTTCCGACCA  GAGA  TGGAAGGAAC  GCTT TTATT    AGATCAAAACCAAT  CGGTGG-CGGG--  ct--tg  --CTCGC-CCACCG  TTTACCTTGGTGACTCTG  AATAA  CTTTGTGCTGA  TCGCACGGT  CCC-GT  ACCGGCGA  CGC  ATCTTTCAAATGTCTGC  CTTATCAACTGTCGATGGTAGG  TTCTGCG  CCTACCATGGTTGTAACGGG  TAA CGGGGAAT  CAGG  GTTCGATTCCG  GAG    A    GGGAGC  CTGAGAAACG  GCTACC  A  CATC  CAAG  GAAG  GCA  GCAGGCGC  GCAAA  TTACCCACTCCCG  GCA  CGGGGAGGTA  G  TGACGAAAA
Belyta_sp_MJY128                                    ---  -----  ---  ---  -  -----  -  -----------  -  --------  -------------  --  ---------------  -------  -----------  ------  ---  ------  --------------------  ------  ----  ----  ---------------  -----  ----------------  ---------  ----------  ----  ----------  ---- -----    --------------  -------------  ------  --------------  ------------------  -----  -----------  ---------  ------  --------  ---  -----------------  ----------------------  -------  --------------------  --- --------  ----  -----------  ---    -    ------  ----------  ------  -  ----  ----  ----  ---  --------  -----  -------------  ---  ----------  -  ---------
Aclista_sp_D1949                                    ---  -----  ---  ---  -  -----  -  -----------  -  --------  -------------  --  ---------------  -------  -----------  ------  ---  ------  --------------------  ------  ----  ----  ---------------  -----  ----------------  ---------  ----------  ----  ----------  ---- -----    --------------  -------------  ------  --------------  ------------------  -----  -----------  ---------  ------  --------  ---  -----------------  ----------------------  -------  --------------------  --- --------  ----  -----------  ---    -    ------  ----GAAACG  GCTACC  A  CATC  CAAG  GAAG  GCA  GCAGGCGC  GCAAA  TTACCCACTCCCG  GCA  CGGGGAGGTA  G  TGACGAAAA
Miota_sp_D1950                                      ---  -----  ---  ---  -  -----  -  -----------  -  --------  -------------  --  ---------------  -------  -----------  ------  ---  ------  --------------------  ------  ----  ----  ---------------  -----  ----------------  ---------  ----------  ----  ----------  ---- -----    --------------  -------------  ------  --------------  ------------------  -----  -----------  ---------  ------  --------  ---  -----------------  ----------------------  -------  --------------------  --- --------  ----  -----------  ---    -    ------  ----------  ------  -  ----  ----  ----  ---  --------  -----  -------------  ---  ----------  -  ---------
Cinetus_californicus_D1951                          ---  -----  ---  ---  -  -----  -  -----------  -  --------  -------------  --  ---------------  -------  -----------  ------  ---  ------  --------------------  ------  ----  ----  ---------------  -----  ----------------  ---------  ----------  ----  ----------  ---- -----    --------------  -------------  ------  --------------  ------------------  -----  -----------  ---------  ------  --------  ---  -----------------  ----------------------  -------  --------------------  --- --------  ----  -----------  ---    -    ------  ----------  ------  -  ----  ----  ----  ---  --------  -----  -------------  ---  ----------  -  ---------
Opazon_sp_D1953                                     TAC  CTGGT  TGA  TCC  T  GCCAG  T  AGTCATATGCT  T  GTCTCAAA  GATTAAGCCATGC  AT  GTCTCAGTGCATGCC  GAATTAA  GGTGAAACCGC  GAATGG  CTC  ATTAAA  TCAGTTATGGTTCCTTAGAT  CGTACC  CACA  TTA-  CTTGGATAACTGTGG  TAATT  CTAGAGCTAATACATG  CAAACCAGA  GTTCCGACCA  GAGA  TGGAAGGAAC  GCTT TTATT    AGATCAAAACCAAT  CGGTGG-CGGG--  ct--cg  --CTCGT-CCACCG  TTTACTTTGGTGACTCTG  AATAA  CTTTGTGCTGA  TCGCACGGT  CTC-GT  ACCGGCGA  CGC  ATCTTTCAAATGTCTGC  CTTATCAACTGTCGATGGTAGG  TTCTGCG  CCTACCATGGTTGTAACGGG  TAA CGGGGAAT  CAGG  GTTCGATTCCG  GAG    A    GGGAGC  CTGAGAAACG  GCTACC  A  CATC  CAAG  GAAG  GCA  GCAGGCGC  GCAAA  TTACCCACTCCCG  GCA  CGGGGAGGTA  G  TGACGAAAA
Anommatium_sp_D1954                                 ---  -----  ---  ---  -  -----  -  -----------  -  --------  -------------  --  ---------------  -------  -----------  ------  ---  ------  --------------------  ------  ----  ----  ---------------  -----  ----------------  ---------  ----------  ----  ----------  ---- -----    --------------  -------------  ------  --------------  ------------------  -----  -----------  ---------  ------  --------  ---  -----------------  ----------------------  -------  --------------------  --- --------  ----  -----------  ---    -    ------  ----------  ------  -  ----  ----  ----  ---  --------  -----  -------------  ---  ----------  -  ---------
Aneurhynchus_sp_D1957                               ---  -----  ---  ---  -  -----  -  -----------  -  --------  -------------  --  ---------------  -------  -----------  ------  ---  ------  --------------------  ------  ----  ----  ---------------  -----  ----------------  ---------  ----------  ----  ----------  ---- -----    --------------  -------------  ------  --------------  ------------------  -----  -----------  ---------  ------  --------  ---  -----------------  ----------------------  -------  --------------------  --- --------  ----  -----------  ---    -    ------  -TGAGAAACG  GCTACC  A  CATC  CAAG  GAAG  GCA  GCAGGCGC  GCAAA  TTACCCACTCCCG  GCA  CGGGGAGGTA  G  TGACGAAAA
Coptera_sp_1_MJY63                                  ---  -----  ---  ---  -  -----  -  -----------  -  --------  -------------  --  ---------------  -------  -----------  ------  ---  ------  --------------------  ------  ----  ----  ---------------  -----  ----------------  ---------  ----------  ----  ----------  ---- -----    --------------  -------------  ------  --------------  ------------------  -----  -----------  ---------  ------  --------  ---  -----------------  ----------------------  -------  --------------------  --- --------  ----  -----------  ---    -    ------  ----------  ------  -  ----  ----  ----  ---  --------  -----  -------------  ---  ----------  -  ---------
Coptera_sp_2_MJY64                                  ---  -----  ---  ---  -  -----  -  -----------  -  --------  -------------  --  ---------------  -------  -----------  ------  ---  ------  --------------------  ------  ----  ----  ---------------  -----  ----------------  ---------  ----------  ----  ----------  ---- -----    --------------  -------------  ------  --------------  ------------------  -----  -----------  ---------  ------  --------  ---  -----------------  ----------------------  -------  --------------------  --- --------  ----  -----------  ---    -    ------  ----------  ------  -  ----  ----  ----  ---  --------  -----  -------------  ---  ----------  -  ---------
Pantolytomia_sp_MJY171                              ---  -----  ---  ---  -  -----  -  -----------  -  --------  -------------  --  ---------------  -------  -----------  ------  ---  ------  --------------------  ------  ----  ----  ---------------  -----  ----------------  ---------  ----------  ----  ----------  ---- -----    --------------  -------------  ------  --------------  ------------------  -----  -----------  ---------  ------  --------  ---  -----------------  ----------------------  -------  --------------------  --- --------  ----  -----------  ---    -    ------  ----------  ------  -  ----  ----  ----  ---  --------  -----  -------------  ---  ----------  -  ---------
Entomacis_sp_MJY98                                  ---  -----  ---  ---  -  -----  -  -----------  -  --------  -------------  --  ---------------  -------  -----------  ------  ---  ------  --------------------  ------  ----  ----  ---------------  -----  ----------------  ---------  ----------  ----  ----------  ---- -----    --------------  -------------  ------  --------------  ------------------  -----  -----------  ---------  ------  --------  ---  -----------------  ----------------------  -------  --------------------  --- --------  ----  -----------  ---    -    ------  ----------  ------  -  ----  ----  ----  ---  --------  -----  -------------  ---  ----------  -  ---------
Mymaromella_mira_D1040                              ---  -----  ---  ---  -  -----  -  -----------  -  --------  -------------  --  ---------------  -------  -----------  ------  ---  ------  --------------------  ------  ----  ----  ---------------  -----  ----------------  ---------  ----------  ----  ----------  ---- -----    --------------  -------------  ------  --------------  ------------------  -----  -----------  ---------  ------  --------  ---  -----------------  ----------------------  -------  --------------------  --- --------  ----  -----------  ---    -    ------  ----------  ------  -  ----  ----  ----  ---  --------  -----  -------------  ---  ----------  -  ---------
Mymaromma_ypt_D0851                                 ---  -----  ---  ---  -  -----  -  -----------  -  --------  -------------  --  ---------------  -------  -----------  ------  ---  ------  --------------------  ------  ----  ----  ---------------  -----  ----------------  ---------  ----------  ----  ----------  ---- -----    --------------  -------------  ------  --------------  ------------------  -----  -----------  ---------  ------  --------  ---  -----------------  ----------------------  -------  --------------------  --- --------  ----  -----------  ---    -    ------  ----------  ------  -  ----  ----  ----  ---  --------  -----  -------------  ---  ----------  -  ---------
Mymaromma_anomalum_D1611                            TAC  CTGGT  TGA  TCC  T  GCCAG  T  AGTCATATGCT  T  GTCTCAAA  GATTAAGCCATGC  AT  GTCTCAGTGCAAGCC  AAATTAA  GGTGAAACCGC  GAATGG  CTC  ATTAAA  TCAGTTATGGTTCCTTAGAT  CGTACC  CACA  TTTA  CTTGGATAACTGTGG  TAATT  CTAGAGCTAATACATG  CAAACCAGA  GTTCCGACCA  GAGA  TGGGAGGAAC  GCTT TTATT    AGATCAAAACCAAT  CGGTGG-------  ctc-gt  --------CCGCCG  TATGACTTGGTGACTCTG  AATAA  CTTTGTGCTGA  TCGCACGGT  CTC-GT  ACCGGCGA  CGA  ATCTTTCAAATGTCTGC  CTTATCAACTGTCGATGGTAGG  TTCCGCG  CCTACCATGGTTGTAACGGG  TAA CGGGGAAT  CAGG  GTTCGATTCCG  GAG    A    GGGAGC  CTGAGAAACG  GCTACC  A  CATC  CAAG  GAAG  GCA  GCAGGCGC  GCAAA  TTACCCACTCCCG  GCA  CGGGGAGGTA  G  TGACGAAAA
Mymaromma_sp_D1595                                  ---  -----  ---  ---  -  -----  -  -----------  -  --------  -------------  --  ---------------  -------  -----------  ------  ---  ------  --------------------  ------  ----  ----  ---------------  -----  ----------------  ---------  ----------  ----  ----------  ---- -----    --------------  -------------  ------  --------------  ------------------  -----  -----------  ---------  ------  --------  ---  -----------------  ----------------------  -------  --------------------  --- --------  ----  -----------  ---    -    ------  ----------  ------  -  ----  ----  ----  ---  --------  -----  -------------  ---  ----------  -  ---------
MYA_Anagrus_epos_D2208_uvxyz                        ---  -----  ---  ---  -  -----  -  -----------  -  --------  -------------  --  ---------------  -------  -----------  ------  ---  ------  --------------------  ------  ----  ----  ---------------  -----  ----------------  ---------  ----------  ----  ----------  ---- -----    --------------  -------------  ------  --------------  ------------------  -----  -----------  ---------  ------  --------  ---  -----------------  ----------------------  -------  --------------------  --- --------  ----  -----------  ---    -    ------  ----------  ------  -  ----  ----  ----  ---  --------  -----  -------------  ---  ----------  -  ---------
MYA_Litus_cynipseus_D1609_vxyz                      ---  -----  ---  ---  -  -----  -  -----------  -  --------  -------------  --  ---------------  -------  -----------  ------  ---  ------  --------------------  ------  ----  ----  ---------------  -----  ----------------  ---------  ----------  ----  ----------  ---- -----    --------------  -------------  ------  --------------  ------------------  -----  -----------  ---------  ------  --------  ---  -----------------  ----------------------  -------  --------------------  --- --------  ----  -----------  ---    -    ------  ----------  ------  -  ----  ----  ----  ---  --------  -----  -------------  ---  ----------  -  ---------
MYA_Stethynium_ophelimi_D2444_uxyz                  ---  -----  ---  ---  -  -----  -  -----------  -  --------  -------------  --  ---------------  -------  -----------  ------  ---  ------  --------------------  ------  ----  ----  ---------------  -----  ----------------  ---------  ----------  ----  ----------  ---- -----    --------------  -------------  ------  --------------  ------------------  -----  -----------  ---------  ------  --------  ---  -----------------  ----------------------  -------  --------------------  --- --------  ----  -----------  ---    -    ------  ----------  ------  -  ----  ----  ----  ---  --------  -----  -------------  ---  ----------  -  ---------
MYE_Eubroncus_sp1_D1445_uxy                         ---  -----  ---  ---  -  -----  -  -----------  -  --------  -------------  --  ---------------  -------  -----------  ------  ---  ------  --------------------  ------  ----  ----  ---------------  -----  ----------------  ---------  ----------  ----  ----------  ---- -----    --------------  -------------  ------  --------------  ------------------  -----  -----------  ---------  ------  --------  ---  -----------------  ----------------------  -------  --------------------  --- --------  ----  -----------  ---    -    ------  ----------  ------  -  ----  ----  ----  ---  --------  -----  -------------  ---  ----------  -  ---------
MYE_Eubroncus_sp2_D1593_tuxy                        TAC  CTGGT  TGA  TCC  T  GCCAG  T  AGTCATATGCT  T  GTTTTAAA  GAATAAGCCATGC  AT  GTTTCAGTGCATACC  GCATTAA  GGTGAAACCGC  GAATGG  CTC  ATTAAA  TCAGTTATGGTTCCTTAGAT  CGTACC  CACT  TTTA  CTTGGATAACTGTGG  TAATT  CTAGAGCTAATACATG  CAAACCAGA  GTCCCGACCA  GAGA  TGGAAGGGAC  GCTT TTATT    AGATCAAAACCAAT  CGGTGA-CGGG--  t---ct  --CCCGT-TCATCG  GTTTCTTTGGTGACTCTG  AATAA  CTTTGTGCTGA  TCGCATGGT  CTC-GT  ACCGGCGA  CGC  ATCTTTCAAATGTCTGC  CTTATCAACTGTCGATGGTAGG  TTCTGCG  CCTACCATGGTTGTAACGGG  TAA CGGGGAAT  CAGG  GTTCGATTCCG  GAG    A    GGGAGC  CTGAGAAACG  GCTACC  A  CATC  CAAG  GAAG  GCA  GCAGGCGC  GCAAA  TTACCCACTCCCG  GCA  CGGGGAGGTA  G  TGACGAAAA
MYI_Borneomymar_madagascar_D1058_uxyz               ---  -----  ---  ---  -  -----  -  -----------  -  --------  -------------  --  ---------------  -------  -----------  ------  ---  ------  --------------------  ------  ----  ----  ---------------  -----  ----------------  ---------  ----------  ----  ----------  ---- -----    --------------  -------------  ------  --------------  ------------------  -----  -----------  ---------  ------  --------  ---  -----------------  ----------------------  -------  --------------------  --- --------  ----  -----------  ---    -    ------  ----------  ------  -  ----  ----  ----  ---  --------  -----  -------------  ---  ----------  -  ---------
MYM_Acmopolynema_varium_D0591_uvxyz                 ---  -----  ---  ---  -  -----  -  -----------  -  --------  -------------  --  ---------------  -------  -----------  ------  ---  ------  --------------------  ------  ----  ----  ---------------  -----  ----------------  ---------  ----------  ----  ----------  ---- -----    --------------  -------------  ------  --------------  ------------------  -----  -----------  ---------  ------  --------  ---  -----------------  ----------------------  -------  --------------------  --- --------  ----  -----------  ---    -    ------  ----------  ------  -  ----  ----  ----  ---  --------  -----  -------------  ---  ----------  -  ---------
MYM_Anaphes_victus_D2564_vxyz                       ---  -----  ---  ---  -  -----  -  -----------  -  --------  -------------  --  ---------------  -------  -----------  ------  ---  ------  --------------------  ------  ----  ----  ---------------  -----  ----------------  ---------  ----------  ----  ----------  ---- -----    --------------  -------------  ------  --------------  ------------------  -----  -----------  ---------  ------  --------  ---  -----------------  ----------------------  -------  --------------------  --- --------  ----  -----------  ---    -    ------  ----------  ------  -  ----  ----  ----  ---  --------  -----  -------------  ---  ----------  -  ---------
MYM_Australomymar_sp_D2026_tuvxyz                   TAC  CTGGT  TGA  TCC  T  GCCAG  T  AGTCATATGCT  T  GTCTCAAA  GATTAAGCCATGC  AT  GTCTCAGTGCATGCC  GTATTAA  GGTGAAACCGC  GAATGG  CTC  ATTAAA  TCAGTTATGGTTCCTTAGAT  CGTACC  CACA  TTTA  CTTGGATAACTGTGG  TAATT  CTAGAGCTAATACATG  CAAACTAGA  GTTCCGACCA  GAGA  TGGAAGGAAC  GCTT TTATT    AGATCAAAACCAAT  CGGTGA-CGGG--  ttaact  --CTCGT-TCATCG  TATACCTTGGTGACTCTG  AATAA  CTTTGTGCTGA  TCGCATGGT  CTC-GT  ACCGGCGA  CGC  ATCTTTCAAATGTCTGC  CTTATCAACTGTCGATGGTAGG  TTCTGCG  CCTACCATGGTTGTAACGGG  TAA CGGGGAAT  CAGG  GTTCGATTCCG  GAG    A    GGGAGC  CTGAGAAACG  GCTACC  A  CATC  CAAG  GAAG  GCA  GCAGGCGC  GCAAA  TTACCCACTCCCG  GCA  CGGGGAGGTA  G  TGACGAAAA
MYM_Ceratanaphes_nsp_D1041_uvxyz                    ---  -----  ---  ---  -  -----  -  -----------  -  --------  -------------  --  ---------------  -------  -----------  ------  ---  ------  --------------------  ------  ----  ----  ---------------  -----  ----------------  ---------  ----------  ----  ----------  ---- -----    --------------  -------------  ------  --------------  ------------------  -----  -----------  ---------  ------  --------  ---  -----------------  ----------------------  -------  --------------------  --- --------  ----  -----------  ---    -    ------  ----------  ------  -  ----  ----  ----  ---  --------  -----  -------------  ---  ----------  -  ---------
MYM_Erythmelus_rosascostai_D2658_xyz                ---  -----  ---  ---  -  -----  -  -----------  -  --------  -------------  --  ---------------  -------  -----------  ------  ---  ------  --------------------  ------  ----  ----  ---------------  -----  ----------------  ---------  ----------  ----  ----------  ---- -----    --------------  -------------  ------  --------------  ------------------  -----  -----------  ---------  ------  --------  ---  -----------------  ----------------------  -------  --------------------  --- --------  ----  -----------  ---    -    ------  ----------  ------  -  ----  ----  ----  ---  --------  -----  -------------  ---  ----------  -  ---------
MYM_Gonatocerus_ashmeadi_D1602_tuvxyz               TAC  CTGGT  TGA  TCC  T  GCCAG  T  AGTCATATGCT  T  GTCTCAAA  GATTAAGCCATGC  AT  GTCTCAGTACTTGCC  TCATTAA  GGTGAAACCGC  GAATGG  CTC  ATTAAA  TCAGTTATGGTTCCTTAGAT  CGTACC  AACA  TTTA  CTTGGATAACTGTGG  TAATT  CTAGAGCTAATACATG  CAAACCAGA  GTTCCAACCA  GAGA  TGGAAGGAAC  GCTT TTATT    AGATCAAAACCAAT  CGGTCTTAAAGCT  t---cg  GGCTCTT-TGATCG  TTTACCTTGGTGACTCTG  AATAA  CTTTGAGCTGA  TCGCATGGT  CTC-GC  ACCGGCGA  CGG  ATCTTTCAAATGTCTGC  CTTATCAACTGTCGATGGTAGG  TTCTGCG  CCTACCATGGTTGTAACGGG  TAA CGGGGAAT  CAGG  GTTCGATTCCG  GAG    A    GGGAGC  CTGAGAAACG  GCTACC  A  CATC  CAAG  GAAG  GCA  GCAGGCGC  GCAAA  TTACCCACTCCCG  GCA  CGGGGAGGTA  G  TGACGAAAA
MYM_Gonatocerus_triguttatus_D1054_uvxyz             ---  -----  ---  ---  -  -----  -  -----------  -  --------  -------------  --  ---------------  -------  -----------  ------  ---  ------  --------------------  ------  ----  ----  ---------------  -----  ----------------  ---------  ----------  ----  ----------  ---- -----    --------------  -------------  ------  --------------  ------------------  -----  -----------  ---------  ------  --------  ---  -----------------  ----------------------  -------  --------------------  --- --------  ----  -----------  ---    -    ------  ----------  ------  -  ----  ----  ----  ---  --------  -----  -------------  ---  ----------  -  ---------
MYM_Mymar_regale_D2211_tuvxyz                       TAC  CTGGT  TGA  TCC  T  GCCAG  T  AGTCATATGCT  T  GTCTCAAA  GATTAAGCCATGC  AT  GTTTCAGTGCATGCC  GTATTAA  GGTGAAACCGC  GAATGG  CTC  ATTAAA  TCAGTTATGGTTTCTTAGAT  AGTACC  CACA  TTTA  CTTGGATAACTGTGG  TAATT  CTAGAGCTAATACATG  CAAACCAGA  GTTCCGACCA  GAGA  TGGAAGGAAC  GCTT TTATT    AGATCAAAACCAAT  CGGTGA-CGGG--  ttcgct  --CCTGT-TCATCG  TTTACCTTGGTGACTCTG  AATAA  CTTTGTGCTGA  TCGCATGGT  CTC-GT  ACCGGCGA  CGC  ATCTTTCAAATGTCTGC  CTTATCAACTGTCGATGGTAGG  TTCTGCG  CCTACCATGGTTGTAACGGG  TAA CGGGGAAT  CAGG  GTTCGATTCCG  GAG    A    GGGAGC  CTGAGAAACG  GCTACC  A  CATC  CAAG  GAAG  GCA  GCAGGCGC  GCAAA  TTACCCACTCCCG  GCA  CGGGGAGGTA  G  TGACGAAAA
MYM_Ooctonus_sp_D1597_uvxy                          ---  -----  ---  ---  -  -----  -  -----------  -  --------  -------------  --  ---------------  -------  -----------  ------  ---  ------  --------------------  ------  ----  ----  ---------------  -----  ----------------  ---------  ----------  ----  ----------  ---- -----    --------------  -------------  ------  --------------  ------------------  -----  -----------  ---------  ------  --------  ---  -----------------  ----------------------  -------  --------------------  --- --------  ----  -----------  ---    -    ------  ----------  ------  -  ----  ----  ----  ---  --------  -----  -------------  ---  ----------  -  ---------
ROT_Chiloe_micropteron_D2025_tuvxyz                 TAC  CTGGT  TGA  TCC  T  GCCAG  T  AGTCATATGCT  T  GTCTCAAA  GATTAAGCCATGC  AT  GTCTCAGTGCATGCC  AAATTAA  GGTGAAACCGC  GAATGG  CTC  ATTAAA  TCAGTTATGGTTCCTTAGAT  CGTACC  CACA  TTTA  CTTGGATAACTGTGG  TAATT  CTAGAGCTAATACATG  CAAACCAGA  GTTCCAACCA  GAGA  TGGAAGGAAC  GCTT TTATT    AGATCAAAACCAAT  CGGTGG-CGGG--  tt--cg  --CTCGT-CCACCG  TTTACCTTGGTGACTCTG  AATAA  CTTTGTGCTGA  TCGCATGGT  CTTTGC  ACCGGCGA  CGC  ATCTTTCAAATGTCTGC  CTTATCAACTGTCGATGGTAGG  TTCTGCG  CCTACCATGGTTGTAACGGG  TAA CGGGGAAT  CAGG  GTTCGATTCCG  GAG    A    GGGAGC  CTGAGAAACG  GCTACC  A  CATC  CAAG  GAAG  GCA  GCAGGCGC  GCAAA  TTACCCACTCCCG  GCA  CGGGGAGGTA  G  TGACGAAAA
AGA_Agaon_nsp_R1938_01_uxyz                         ---  -----  ---  ---  -  -----  -  -----------  -  --------  -------------  --  ---------------  -------  -----------  ------  ---  ------  --------------------  ------  ----  ----  ---------------  -----  ----------------  ---------  ----------  ----  ----------  ---- -----    --------------  -------------  ------  --------------  ------------------  -----  -----------  ---------  ------  --------  ---  -----------------  ----------------------  -------  --------------------  --- --------  ----  -----------  ---    -    ------  ----------  ------  -  ----  ----  ----  ---  --------  -----  -------------  ---  ----------  -  ---------
AGA_Agaon_spatulatum_R1925_01_uxyz                  ---  -----  ---  ---  -  -----  -  -----------  -  --------  -------------  --  ---------------  -------  -----------  ------  ---  ------  --------------------  ------  ----  ----  ---------------  -----  ----------------  ---------  ----------  ----  ----------  ---- -----    --------------  -------------  ------  --------------  ------------------  -----  -----------  ---------  ------  --------  ---  -----------------  ----------------------  -------  --------------------  --- --------  ----  -----------  ---    -    ------  ----------  ------  -  ----  ----  ----  ---  --------  -----  -------------  ---  ----------  -  ---------
AGA_Alfonsiella_brongersmai_R1935_02_uxyz           ---  -----  ---  ---  -  -----  -  -----------  -  --------  -------------  --  ---------------  -------  -----------  ------  ---  ------  --------------------  ------  ----  ----  ---------------  -----  ----------------  ---------  ----------  ----  ----------  ---- -----    --------------  -------------  ------  --------------  ------------------  -----  -----------  ---------  ------  --------  ---  -----------------  ----------------------  -------  --------------------  --- --------  ----  -----------  ---    -    ------  ----------  ------  -  ----  ----  ----  ---  --------  -----  -------------  ---  ----------  -  ---------
AGA_Alfonsiella_longiscapa_R2474_01_uxyz            ---  -----  ---  ---  -  -----  -  -----------  -  --------  -------------  --  ---------------  -------  -----------  ------  ---  ------  --------------------  ------  ----  ----  ---------------  -----  ----------------  ---------  ----------  ----  ----------  ---- -----    --------------  -------------  ------  --------------  ------------------  -----  -----------  ---------  ------  --------  ---  -----------------  ----------------------  -------  --------------------  --- --------  ----  -----------  ---    -    ------  ----------  ------  -  ----  ----  ----  ---  --------  -----  -------------  ---  ----------  -  ---------
AGA_Alfonsiella_michaloudi_R1935_01_uxyz            ---  -----  ---  ---  -  -----  -  -----------  -  --------  -------------  --  ---------------  -------  -----------  ------  ---  ------  --------------------  ------  ----  ----  ---------------  -----  ----------------  ---------  ----------  ----  ----------  ---- -----    --------------  -------------  ------  --------------  ------------------  -----  -----------  ---------  ------  --------  ---  -----------------  ----------------------  -------  --------------------  --- --------  ----  -----------  ---    -    ------  ----------  ------  -  ----  ----  ----  ---  --------  -----  -------------  ---  ----------  -  ---------
AGA_Alfonsiella_pipithiensis_R2475_01_uxyz          ---  -----  ---  ---  -  -----  -  -----------  -  --------  -------------  --  ---------------  -------  -----------  ------  ---  ------  --------------------  ------  ----  ----  ---------------  -----  ----------------  ---------  ----------  ----  ----------  ---- -----    --------------  -------------  ------  --------------  ------------------  -----  -----------  ---------  ------  --------  ---  -----------------  ----------------------  -------  --------------------  --- --------  ----  -----------  ---    -    ------  ----------  ------  -  ----  ----  ----  ---  --------  -----  -------------  ---  ----------  -  ---------
AGA_Allotriozoon_heterandromorphum_R2190_01_uxyz    ---  -----  ---  ---  -  -----  -  -----------  -  --------  -------------  --  ---------------  -------  -----------  ------  ---  ------  --------------------  ------  ----  ----  ---------------  -----  ----------------  ---------  ----------  ----  ----------  ---- -----    --------------  -------------  ------  --------------  ------------------  -----  -----------  ---------  ------  --------  ---  -----------------  ----------------------  -------  --------------------  --- --------  ----  -----------  ---    -    ------  ----------  ------  -  ----  ----  ----  ---  --------  -----  -------------  ---  ----------  -  ---------
AGA_Blastophaga_nsp_R1757_02_uxyz                   ---  -----  ---  ---  -  -----  -  -----------  -  --------  -------------  --  ---------------  -------  -----------  ------  ---  ------  --------------------  ------  ----  ----  ---------------  -----  ----------------  ---------  ----------  ----  ----------  ---- -----    --------------  -------------  ------  --------------  ------------------  -----  -----------  ---------  ------  --------  ---  -----------------  ----------------------  -------  --------------------  --- --------  ----  -----------  ---    -    ------  ----------  ------  -  ----  ----  ----  ---  --------  -----  -------------  ---  ----------  -  ---------
AGA_Blastophaga_psenes_R1536_01_uxyz                ---  -----  ---  ---  -  -----  -  -----------  -  --------  -------------  --  ---------------  -------  -----------  ------  ---  ------  --------------------  ------  ----  ----  ---------------  -----  ----------------  ---------  ----------  ----  ----------  ---- -----    --------------  -------------  ------  --------------  ------------------  -----  -----------  ---------  ------  --------  ---  -----------------  ----------------------  -------  --------------------  --- --------  ----  -----------  ---    -    ------  ----------  ------  -  ----  ----  ----  ---  --------  -----  -------------  ---  ----------  -  ---------
AGA_Blastophaga_quadrupes_R1879_01_uxyz             ---  -----  ---  ---  -  -----  -  -----------  -  --------  -------------  --  ---------------  -------  -----------  ------  ---  ------  --------------------  ------  ----  ----  ---------------  -----  ----------------  ---------  ----------  ----  ----------  ---- -----    --------------  -------------  ------  --------------  ------------------  -----  -----------  ---------  ------  --------  ---  -----------------  ----------------------  -------  --------------------  --- --------  ----  -----------  ---    -    ------  ----------  ------  -  ----  ----  ----  ---  --------  -----  -------------  ---  ----------  -  ---------
AGA_Courtella_hladikae_R1934_01_uxyz                ---  -----  ---  ---  -  -----  -  -----------  -  --------  -------------  --  ---------------  -------  -----------  ------  ---  ------  --------------------  ------  ----  ----  ---------------  -----  ----------------  ---------  ----------  ----  ----------  ---- -----    --------------  -------------  ------  --------------  ------------------  -----  -----------  ---------  ------  --------  ---  -----------------  ----------------------  -------  --------------------  --- --------  ----  -----------  ---    -    ------  ----------  ------  -  ----  ----  ----  ---  --------  -----  -------------  ---  ----------  -  ---------
AGA_Deilagaon_chrysolepidis_R1372_04_uxyz           ---  -----  ---  ---  -  -----  -  -----------  -  --------  -------------  --  ---------------  -------  -----------  ------  ---  ------  --------------------  ------  ----  ----  ---------------  -----  ----------------  ---------  ----------  ----  ----------  ---- -----    --------------  -------------  ------  --------------  ------------------  -----  -----------  ---------  ------  --------  ---  -----------------  ----------------------  -------  --------------------  --- --------  ----  -----------  ---    -    ------  ----------  ------  -  ----  ----  ----  ---  --------  -----  -------------  ---  ----------  -  ---------
AGA_Dolichoris_beddomei_R0914_01_uxyz               ---  -----  ---  ---  -  -----  -  -----------  -  --------  -------------  --  ---------------  -------  -----------  ------  ---  ------  --------------------  ------  ----  ----  ---------------  -----  ----------------  ---------  ----------  ----  ----------  ---- -----    --------------  -------------  ------  --------------  ------------------  -----  -----------  ---------  ------  --------  ---  -----------------  ----------------------  -------  --------------------  --- --------  ----  -----------  ---    -    ------  ----------  ------  -  ----  ----  ----  ---  --------  -----  -------------  ---  ----------  -  ---------
AGA_Dolichoris_nsp_R1229_01_uxyz                    ---  -----  ---  ---  -  -----  -  -----------  -  --------  -------------  --  ---------------  -------  -----------  ------  ---  ------  --------------------  ------  ----  ----  ---------------  -----  ----------------  ---------  ----------  ----  ----------  ---- -----    --------------  -------------  ------  --------------  ------------------  -----  -----------  ---------  ------  --------  ---  -----------------  ----------------------  -------  --------------------  --- --------  ----  -----------  ---    -    ------  ----------  ------  -  ----  ----  ----  ---  --------  -----  -------------  ---  ----------  -  ---------
AGA_Dolichoris_nsp_R1232_01_uxz                     ---  -----  ---  ---  -  -----  -  -----------  -  --------  -------------  --  ---------------  -------  -----------  ------  ---  ------  --------------------  ------  ----  ----  ---------------  -----  ----------------  ---------  ----------  ----  ----------  ---- -----    --------------  -------------  ------  --------------  ------------------  -----  -----------  ---------  ------  --------  ---  -----------------  ----------------------  -------  --------------------  --- --------  ----  -----------  ---    -    ------  ----------  ------  -  ----  ----  ----  ---  --------  -----  -------------  ---  ----------  -  ---------
AGA_Dolichoris_nsp_R1237_01_uxyz                    ---  -----  ---  ---  -  -----  -  -----------  -  --------  -------------  --  ---------------  -------  -----------  ------  ---  ------  --------------------  ------  ----  ----  ---------------  -----  ----------------  ---------  ----------  ----  ----------  ---- -----    --------------  -------------  ------  --------------  ------------------  -----  -----------  ---------  ------  --------  ---  -----------------  ----------------------  -------  --------------------  --- --------  ----  -----------  ---    -    ------  ----------  ------  -  ----  ----  ----  ---  --------  -----  -------------  ---  ----------  -  ---------
AGA_Dolichoris_nsp_R1238_01_uxyz                    ---  -----  ---  ---  -  -----  -  -----------  -  --------  -------------  --  ---------------  -------  -----------  ------  ---  ------  --------------------  ------  ----  ----  ---------------  -----  ----------------  ---------  ----------  ----  ----------  ---- -----    --------------  -------------  ------  --------------  ------------------  -----  -----------  ---------  ------  --------  ---  -----------------  ----------------------  -------  --------------------  --- --------  ----  -----------  ---    -    ------  ----------  ------  -  ----  ----  ----  ---  --------  -----  -------------  ---  ----------  -  ---------
AGA_Dolichoris_nsp_R1276_01_uxz                     ---  -----  ---  ---  -  -----  -  -----------  -  --------  -------------  --  ---------------  -------  -----------  ------  ---  ------  --------------------  ------  ----  ----  ---------------  -----  ----------------  ---------  ----------  ----  ----------  ---- -----    --------------  -------------  ------  --------------  ------------------  -----  -----------  ---------  ------  --------  ---  -----------------  ----------------------  -------  --------------------  --- --------  ----  -----------  ---    -    ------  ----------  ------  -  ----  ----  ----  ---  --------  -----  -------------  ---  ----------  -  ---------
AGA_Dolichoris_nsp_R1288_01_uxyz                    ---  -----  ---  ---  -  -----  -  -----------  -  --------  -------------  --  ---------------  -------  -----------  ------  ---  ------  --------------------  ------  ----  ----  ---------------  -----  ----------------  ---------  ----------  ----  ----------  ---- -----    --------------  -------------  ------  --------------  ------------------  -----  -----------  ---------  ------  --------  ---  -----------------  ----------------------  -------  --------------------  --- --------  ----  -----------  ---    -    ------  ----------  ------  -  ----  ----  ----  ---  --------  -----  -------------  ---  ----------  -  ---------
AGA_Dolichoris_sp1_R_GW1225_1235_01_uxyz            ---  -----  ---  ---  -  -----  -  -----------  -  --------  -------------  --  ---------------  -------  -----------  ------  ---  ------  --------------------  ------  ----  ----  ---------------  -----  ----------------  ---------  ----------  ----  ----------  ---- -----    --------------  -------------  ------  --------------  ------------------  -----  -----------  ---------  ------  --------  ---  -----------------  ----------------------  -------  --------------------  --- --------  ----  -----------  ---    -    ------  ----------  ------  -  ----  ----  ----  ---  --------  -----  -------------  ---  ----------  -  ---------
AGA_Dolichoris_sp10_R_SU106_1248_01_uxyz            ---  -----  ---  ---  -  -----  -  -----------  -  --------  -------------  --  ---------------  -------  -----------  ------  ---  ------  --------------------  ------  ----  ----  ---------------  -----  ----------------  ---------  ----------  ----  ----------  ---- -----    --------------  -------------  ------  --------------  ------------------  -----  -----------  ---------  ------  --------  ---  -----------------  ----------------------  -------  --------------------  --- --------  ----  -----------  ---    -    ------  ----------  ------  -  ----  ----  ----  ---  --------  -----  -------------  ---  ----------  -  ---------
AGA_Dolichoris_sp11_R_SU134_1265_01_uxyz            ---  -----  ---  ---  -  -----  -  -----------  -  --------  -------------  --  ---------------  -------  -----------  ------  ---  ------  --------------------  ------  ----  ----  ---------------  -----  ----------------  ---------  ----------  ----  ----------  ---- -----    --------------  -------------  ------  --------------  ------------------  -----  -----------  ---------  ------  --------  ---  -----------------  ----------------------  -------  --------------------  --- --------  ----  -----------  ---    -    ------  ----------  ------  -  ----  ----  ----  ---  --------  -----  -------------  ---  ----------  -  ---------
AGA_Dolichoris_sp12_R_SU179_1283_01_uxyz            ---  -----  ---  ---  -  -----  -  -----------  -  --------  -------------  --  ---------------  -------  -----------  ------  ---  ------  --------------------  ------  ----  ----  ---------------  -----  ----------------  ---------  ----------  ----  ----------  ---- -----    --------------  -------------  ------  --------------  ------------------  -----  -----------  ---------  ------  --------  ---  -----------------  ----------------------  -------  --------------------  --- --------  ----  -----------  ---    -    ------  ----------  ------  -  ----  ----  ----  ---  --------  -----  -------------  ---  ----------  -  ---------
AGA_Dolichoris_sp2_R_GW1226_1236_01_uxyz            ---  -----  ---  ---  -  -----  -  -----------  -  --------  -------------  --  ---------------  -------  -----------  ------  ---  ------  --------------------  ------  ----  ----  ---------------  -----  ----------------  ---------  ----------  ----  ----------  ---- -----    --------------  -------------  ------  --------------  ------------------  -----  -----------  ---------  ------  --------  ---  -----------------  ----------------------  -------  --------------------  --- --------  ----  -----------  ---    -    ------  ----------  ------  -  ----  ----  ----  ---  --------  -----  -------------  ---  ----------  -  ---------
AGA_Dolichoris_sp3_R_SU165_1275_01_uxyz             ---  -----  ---  ---  -  -----  -  -----------  -  --------  -------------  --  ---------------  -------  -----------  ------  ---  ------  --------------------  ------  ----  ----  ---------------  -----  ----------------  ---------  ----------  ----  ----------  ---- -----    --------------  -------------  ------  --------------  ------------------  -----  -----------  ---------  ------  --------  ---  -----------------  ----------------------  -------  --------------------  --- --------  ----  -----------  ---    -    ------  ----------  ------  -  ----  ----  ----  ---  --------  -----  -------------  ---  ----------  -  ---------
AGA_Dolichoris_sp4_R_SU71_1238_01_uxyz              ---  -----  ---  ---  -  -----  -  -----------  -  --------  -------------  --  ---------------  -------  -----------  ------  ---  ------  --------------------  ------  ----  ----  ---------------  -----  ----------------  ---------  ----------  ----  ----------  ---- -----    --------------  -------------  ------  --------------  ------------------  -----  -----------  ---------  ------  --------  ---  -----------------  ----------------------  -------  --------------------  --- --------  ----  -----------  ---    -    ------  ----------  ------  -  ----  ----  ----  ---  --------  -----  -------------  ---  ----------  -  ---------
AGA_Dolichoris_sp5_R_SU63_uxyz                      ---  -----  ---  ---  -  -----  -  -----------  -  --------  -------------  --  ---------------  -------  -----------  ------  ---  ------  --------------------  ------  ----  ----  ---------------  -----  ----------------  ---------  ----------  ----  ----------  ---- -----    --------------  -------------  ------  --------------  ------------------  -----  -----------  ---------  ------  --------  ---  -----------------  ----------------------  -------  --------------------  --- --------  ----  -----------  ---    -    ------  ----------  ------  -  ----  ----  ----  ---  --------  -----  -------------  ---  ----------  -  ---------
AGA_Dolichoris_sp6_R_SU16_1228_01_uxyz              ---  -----  ---  ---  -  -----  -  -----------  -  --------  -------------  --  ---------------  -------  -----------  ------  ---  ------  --------------------  ------  ----  ----  ---------------  -----  ----------------  ---------  ----------  ----  ----------  ---- -----    --------------  -------------  ------  --------------  ------------------  -----  -----------  ---------  ------  --------  ---  -----------------  ----------------------  -------  --------------------  --- --------  ----  -----------  ---    -    ------  ----------  ------  -  ----  ----  ----  ---  --------  -----  -------------  ---  ----------  -  ---------
AGA_Dolichoris_sp7_R_SU67_1234_01_uxyz              ---  -----  ---  ---  -  -----  -  -----------  -  --------  -------------  --  ---------------  -------  -----------  ------  ---  ------  --------------------  ------  ----  ----  ---------------  -----  ----------------  ---------  ----------  ----  ----------  ---- -----    --------------  -------------  ------  --------------  ------------------  -----  -----------  ---------  ------  --------  ---  -----------------  ----------------------  -------  --------------------  --- --------  ----  -----------  ---    -    ------  ----------  ------  -  ----  ----  ----  ---  --------  -----  -------------  ---  ----------  -  ---------
AGA_Dolichoris_sp8_R_SU69_1236_01_xyz               ---  -----  ---  ---  -  -----  -  -----------  -  --------  -------------  --  ---------------  -------  -----------  ------  ---  ------  --------------------  ------  ----  ----  ---------------  -----  ----------------  ---------  ----------  ----  ----------  ---- -----    --------------  -------------  ------  --------------  ------------------  -----  -----------  ---------  ------  --------  ---  -----------------  ----------------------  -------  --------------------  --- --------  ----  -----------  ---    -    ------  ----------  ------  -  ----  ----  ----  ---  --------  -----  -------------  ---  ----------  -  ---------
AGA_Dolichoris_sp9_R_SU80_1239_01_uxyz              ---  -----  ---  ---  -  -----  -  -----------  -  --------  -------------  --  ---------------  -------  -----------  ------  ---  ------  --------------------  ------  ----  ----  ---------------  -----  ----------------  ---------  ----------  ----  ----------  ---- -----    --------------  -------------  ------  --------------  ------------------  -----  -----------  ---------  ------  --------  ---  -----------------  ----------------------  -------  --------------------  --- --------  ----  -----------  ---    -    ------  ----------  ------  -  ----  ----  ----  ---  --------  -----  -------------  ---  ----------  -  ---------
AGA_Elisabethiella_glumosae_R1937_01_uxyz           ---  -----  ---  ---  -  -----  -  -----------  -  --------  -------------  --  ---------------  -------  -----------  ------  ---  ------  --------------------  ------  ----  ----  ---------------  -----  ----------------  ---------  ----------  ----  ----------  ---- -----    --------------  -------------  ------  --------------  ------------------  -----  -----------  ---------  ------  --------  ---  -----------------  ----------------------  -------  --------------------  --- --------  ----  -----------  ---    -    ------  ----------  ------  -  ----  ----  ----  ---  --------  -----  -------------  ---  ----------  -  ---------
AGA_Elisabethiella_reflexa_R1813_01_uxyz            ---  -----  ---  ---  -  -----  -  -----------  -  --------  -------------  --  ---------------  -------  -----------  ------  ---  ------  --------------------  ------  ----  ----  ---------------  -----  ----------------  ---------  ----------  ----  ----------  ---- -----    --------------  -------------  ------  --------------  ------------------  -----  -----------  ---------  ------  --------  ---  -----------------  ----------------------  -------  --------------------  --- --------  ----  -----------  ---    -    ------  ----------  ------  -  ----  ----  ----  ---  --------  -----  -------------  ---  ----------  -  ---------
AGA_Eupristina_altissima_R1599_01_uxyz              ---  -----  ---  ---  -  -----  -  -----------  -  --------  -------------  --  ---------------  -------  -----------  ------  ---  ------  --------------------  ------  ----  ----  ---------------  -----  ----------------  ---------  ----------  ----  ----------  ---- -----    --------------  -------------  ------  --------------  ------------------  -----  -----------  ---------  ------  --------  ---  -----------------  ----------------------  -------  --------------------  --- --------  ----  -----------  ---    -    ------  ----------  ------  -  ----  ----  ----  ---  --------  -----  -------------  ---  ----------  -  ---------
AGA_Eupristina_cyclostigma_R1611_01_uxyz            ---  -----  ---  ---  -  -----  -  -----------  -  --------  -------------  --  ---------------  -------  -----------  ------  ---  ------  --------------------  ------  ----  ----  ---------------  -----  ----------------  ---------  ----------  ----  ----------  ---- -----    --------------  -------------  ------  --------------  ------------------  -----  -----------  ---------  ------  --------  ---  -----------------  ----------------------  -------  --------------------  --- --------  ----  -----------  ---    -    ------  ----------  ------  -  ----  ----  ----  ---  --------  -----  -------------  ---  ----------  -  ---------
AGA_Eupristina_koninsbergeri_R1875_01_uxyz          ---  -----  ---  ---  -  -----  -  -----------  -  --------  -------------  --  ---------------  -------  -----------  ------  ---  ------  --------------------  ------  ----  ----  ---------------  -----  ----------------  ---------  ----------  ----  ----------  ---- -----    --------------  -------------  ------  --------------  ------------------  -----  -----------  ---------  ------  --------  ---  -----------------  ----------------------  -------  --------------------  --- --------  ----  -----------  ---    -    ------  ----------  ------  -  ----  ----  ----  ---  --------  -----  -------------  ---  ----------  -  ---------
AGA_Eupristina_n_sp_R1594_01_uxyz                   ---  -----  ---  ---  -  -----  -  -----------  -  --------  -------------  --  ---------------  -------  -----------  ------  ---  ------  --------------------  ------  ----  ----  ---------------  -----  ----------------  ---------  ----------  ----  ----------  ---- -----    --------------  -------------  ------  --------------  ------------------  -----  -----------  ---------  ------  --------  ---  -----------------  ----------------------  -------  --------------------  --- --------  ----  -----------  ---    -    ------  ----------  ------  -  ----  ----  ----  ---  --------  -----  -------------  ---  ----------  -  ---------
AGA_Eupristina_verticillata_R1663_03_uxyz           ---  -----  ---  ---  -  -----  -  -----------  -  --------  -------------  --  ---------------  -------  -----------  ------  ---  ------  --------------------  ------  ----  ----  ---------------  -----  ----------------  ---------  ----------  ----  ----------  ---- -----    --------------  -------------  ------  --------------  ------------------  -----  -----------  ---------  ------  --------  ---  -----------------  ----------------------  -------  --------------------  --- --------  ----  -----------  ---    -    ------  ----------  ------  -  ----  ----  ----  ---  --------  -----  -------------  ---  ----------  -  ---------
AGA_Nigeriella_excavata_R1534_01_uxyz               ---  -----  ---  ---  -  -----  -  -----------  -  --------  -------------  --  ---------------  -------  -----------  ------  ---  ------  --------------------  ------  ----  ----  ---------------  -----  ----------------  ---------  ----------  ----  ----------  ---- -----    --------------  -------------  ------  --------------  ------------------  -----  -----------  ---------  ------  --------  ---  -----------------  ----------------------  -------  --------------------  --- --------  ----  -----------  ---    -    ------  ----------  ------  -  ----  ----  ----  ---  --------  -----  -------------  ---  ----------  -  ---------
AGA_Nigeriella_fusciceps_R1765_05_uxyz              ---  -----  ---  ---  -  -----  -  -----------  -  --------  -------------  --  ---------------  -------  -----------  ------  ---  ------  --------------------  ------  ----  ----  ---------------  -----  ----------------  ---------  ----------  ----  ----------  ---- -----    --------------  -------------  ------  --------------  ------------------  -----  -----------  ---------  ------  --------  ---  -----------------  ----------------------  -------  --------------------  --- --------  ----  -----------  ---    -    ------  ----------  ------  -  ----  ----  ----  ---  --------  -----  -------------  ---  ----------  -  ---------
AGA_Pegoscapus_aguilari_R1529_01_uxyz               ---  -----  ---  ---  -  -----  -  -----------  -  --------  -------------  --  ---------------  -------  -----------  ------  ---  ------  --------------------  ------  ----  ----  ---------------  -----  ----------------  ---------  ----------  ----  ----------  ---- -----    --------------  -------------  ------  --------------  ------------------  -----  -----------  ---------  ------  --------  ---  -----------------  ----------------------  -------  --------------------  --- --------  ----  -----------  ---    -    ------  ----------  ------  -  ----  ----  ----  ---  --------  -----  -------------  ---  ----------  -  ---------
AGA_Pegoscapus_bagataensis_R1682_01_uxyz            ---  -----  ---  ---  -  -----  -  -----------  -  --------  -------------  --  ---------------  -------  -----------  ------  ---  ------  --------------------  ------  ----  ----  ---------------  -----  ----------------  ---------  ----------  ----  ----------  ---- -----    --------------  -------------  ------  --------------  ------------------  -----  -----------  ---------  ------  --------  ---  -----------------  ----------------------  -------  --------------------  --- --------  ----  -----------  ---    -    ------  ----------  ------  -  ----  ----  ----  ---  --------  -----  -------------  ---  ----------  -  ---------
AGA_Pegoscapus_nsp_R1956_01_uxyz                    ---  -----  ---  ---  -  -----  -  -----------  -  --------  -------------  --  ---------------  -------  -----------  ------  ---  ------  --------------------  ------  ----  ----  ---------------  -----  ----------------  ---------  ----------  ----  ----------  ---- -----    --------------  -------------  ------  --------------  ------------------  -----  -----------  ---------  ------  --------  ---  -----------------  ----------------------  -------  --------------------  --- --------  ----  -----------  ---    -    ------  ----------  ------  -  ----  ----  ----  ---  --------  -----  -------------  ---  ----------  -  ---------
AGA_Pegoscapus_sp_D1494_uvxy                        ---  -----  ---  ---  -  -----  -  -----------  -  --------  -------------  --  ---------------  -------  -----------  ------  ---  ------  --------------------  ------  ----  ----  ---------------  -----  ----------------  ---------  ----------  ----  ----------  ---- -----    --------------  -------------  ------  --------------  ------------------  -----  -----------  ---------  ------  --------  ---  -----------------  ----------------------  -------  --------------------  --- --------  ----  -----------  ---    -    ------  ----------  ------  -  ----  ----  ----  ---  --------  -----  -------------  ---  ----------  -  ---------
AGA_Pegoscapus_tonduzi_R1530_01_uxz                 ---  -----  ---  ---  -  -----  -  -----------  -  --------  -------------  --  ---------------  -------  -----------  ------  ---  ------  --------------------  ------  ----  ----  ---------------  -----  ----------------  ---------  ----------  ----  ----------  ---- -----    --------------  -------------  ------  --------------  ------------------  -----  -----------  ---------  ------  --------  ---  -----------------  ----------------------  -------  --------------------  --- --------  ----  -----------  ---    -    ------  ----------  ------  -  ----  ----  ----  ---  --------  -----  -------------  ---  ----------  -  ---------
AGA_Platyscapa_bergi_R1820_01_uxyz                  ---  -----  ---  ---  -  -----  -  -----------  -  --------  -------------  --  ---------------  -------  -----------  ------  ---  ------  --------------------  ------  ----  ----  ---------------  -----  ----------------  ---------  ----------  ----  ----------  ---- -----    --------------  -------------  ------  --------------  ------------------  -----  -----------  ---------  ------  --------  ---  -----------------  ----------------------  -------  --------------------  --- --------  ----  -----------  ---    -    ------  ----------  ------  -  ----  ----  ----  ---  --------  -----  -------------  ---  ----------  -  ---------
AGA_Platyscapa_nsp_R1586_01_uxyz                    ---  -----  ---  ---  -  -----  -  -----------  -  --------  -------------  --  ---------------  -------  -----------  ------  ---  ------  --------------------  ------  ----  ----  ---------------  -----  ----------------  ---------  ----------  ----  ----------  ---- -----    --------------  -------------  ------  --------------  ------------------  -----  -----------  ---------  ------  --------  ---  -----------------  ----------------------  -------  --------------------  --- --------  ----  -----------  ---    -    ------  ----------  ------  -  ----  ----  ----  ---  --------  -----  -------------  ---  ----------  -  ---------
AGA_Platyscapa_nsp_R1587_01_uxyz                    ---  -----  ---  ---  -  -----  -  -----------  -  --------  -------------  --  ---------------  -------  -----------  ------  ---  ------  --------------------  ------  ----  ----  ---------------  -----  ----------------  ---------  ----------  ----  ----------  ---- -----    --------------  -------------  ------  --------------  ------------------  -----  -----------  ---------  ------  --------  ---  -----------------  ----------------------  -------  --------------------  --- --------  ----  -----------  ---    -    ------  ----------  ------  -  ----  ----  ----  ---  --------  -----  -------------  ---  ----------  -  ---------
AGA_Platyscapa_nsp_R1620_05_uxyz                    ---  -----  ---  ---  -  -----  -  -----------  -  --------  -------------  --  ---------------  -------  -----------  ------  ---  ------  --------------------  ------  ----  ----  ---------------  -----  ----------------  ---------  ----------  ----  ----------  ---- -----    --------------  -------------  ------  --------------  ------------------  -----  -----------  ---------  ------  --------  ---  -----------------  ----------------------  -------  --------------------  --- --------  ----  -----------  ---    -    ------  ----------  ------  -  ----  ----  ----  ---  --------  -----  -------------  ---  ----------  -  ---------
AGA_Platyscapa_nsp_R1624_01_uxyz                    ---  -----  ---  ---  -  -----  -  -----------  -  --------  -------------  --  ---------------  -------  -----------  ------  ---  ------  --------------------  ------  ----  ----  ---------------  -----  ----------------  ---------  ----------  ----  ----------  ---- -----    --------------  -------------  ------  --------------  ------------------  -----  -----------  ---------  ------  --------  ---  -----------------  ----------------------  -------  --------------------  --- --------  ----  -----------  ---    -    ------  ----------  ------  -  ----  ----  ----  ---  --------  -----  -------------  ---  ----------  -  ---------
AGA_Platyscapa_nsp_R1629_01_uxyz                    ---  -----  ---  ---  -  -----  -  -----------  -  --------  -------------  --  ---------------  -------  -----------  ------  ---  ------  --------------------  ------  ----  ----  ---------------  -----  ----------------  ---------  ----------  ----  ----------  ---- -----    --------------  -------------  ------  --------------  ------------------  -----  -----------  ---------  ------  --------  ---  -----------------  ----------------------  -------  --------------------  --- --------  ----  -----------  ---    -    ------  ----------  ------  -  ----  ----  ----  ---  --------  -----  -------------  ---  ----------  -  ---------
AGA_Platyscapa_quadraticeps_R1752_01_uxyz           ---  -----  ---  ---  -  -----  -  -----------  -  --------  -------------  --  ---------------  -------  -----------  ------  ---  ------  --------------------  ------  ----  ----  ---------------  -----  ----------------  ---------  ----------  ----  ----------  ---- -----    --------------  -------------  ------  --------------  ------------------  -----  -----------  ---------  ------  --------  ---  -----------------  ----------------------  -------  --------------------  --- --------  ----  -----------  ---    -    ------  ----------  ------  -  ----  ----  ----  ---  --------  -----  -------------  ---  ----------  -  ---------
AGA_Platyscapa_sp_R1330_01_uxyz                     ---  -----  ---  ---  -  -----  -  -----------  -  --------  -------------  --  ---------------  -------  -----------  ------  ---  ------  --------------------  ------  ----  ----  ---------------  -----  ----------------  ---------  ----------  ----  ----------  ---- -----    --------------  -------------  ------  --------------  ------------------  -----  -----------  ---------  ------  --------  ---  -----------------  ----------------------  -------  --------------------  --- --------  ----  -----------  ---    -    ------  ----------  ------  -  ----  ----  ----  ---  --------  -----  -------------  ---  ----------  -  ---------
AGA_Pleistodontes_froggatti_R1397_01_uxyz           ---  -----  ---  ---  -  -----  -  -----------  -  --------  -------------  --  ---------------  -------  -----------  ------  ---  ------  --------------------  ------  ----  ----  ---------------  -----  ----------------  ---------  ----------  ----  ----------  ---- -----    --------------  -------------  ------  --------------  ------------------  -----  -----------  ---------  ------  --------  ---  -----------------  ----------------------  -------  --------------------  --- --------  ----  -----------  ---    -    ------  ----------  ------  -  ----  ----  ----  ---  --------  -----  -------------  ---  ----------  -  ---------
AGA_Pleistodontes_greenwoodi_R1422_01_uxyz          ---  -----  ---  ---  -  -----  -  -----------  -  --------  -------------  --  ---------------  -------  -----------  ------  ---  ------  --------------------  ------  ----  ----  ---------------  -----  ----------------  ---------  ----------  ----  ----------  ---- -----    --------------  -------------  ------  --------------  ------------------  -----  -----------  ---------  ------  --------  ---  -----------------  ----------------------  -------  --------------------  --- --------  ----  -----------  ---    -    ------  ----------  ------  -  ----  ----  ----  ---  --------  -----  -------------  ---  ----------  -  ---------
AGA_Pleistodontes_imperialis_R1396_01_uxyz          ---  -----  ---  ---  -  -----  -  -----------  -  --------  -------------  --  ---------------  -------  -----------  ------  ---  ------  --------------------  ------  ----  ----  ---------------  -----  ----------------  ---------  ----------  ----  ----------  ---- -----    --------------  -------------  ------  --------------  ------------------  -----  -----------  ---------  ------  --------  ---  -----------------  ----------------------  -------  --------------------  --- --------  ----  -----------  ---    -    ------  ----------  ------  -  ----  ----  ----  ---  --------  -----  -------------  ---  ----------  -  ---------
AGA_Pleistodontes_nitens_R1416_02_uxyz              ---  -----  ---  ---  -  -----  -  -----------  -  --------  -------------  --  ---------------  -------  -----------  ------  ---  ------  --------------------  ------  ----  ----  ---------------  -----  ----------------  ---------  ----------  ----  ----------  ---- -----    --------------  -------------  ------  --------------  ------------------  -----  -----------  ---------  ------  --------  ---  -----------------  ----------------------  -------  --------------------  --- --------  ----  -----------  ---    -    ------  ----------  ------  -  ----  ----  ----  ---  --------  -----  -------------  ---  ----------  -  ---------
AGA_Pleistodontes_nr_blandus_R1252_01_uxyz          ---  -----  ---  ---  -  -----  -  -----------  -  --------  -------------  --  ---------------  -------  -----------  ------  ---  ------  --------------------  ------  ----  ----  ---------------  -----  ----------------  ---------  ----------  ----  ----------  ---- -----    --------------  -------------  ------  --------------  ------------------  -----  -----------  ---------  ------  --------  ---  -----------------  ----------------------  -------  --------------------  --- --------  ----  -----------  ---    -    ------  ----------  ------  -  ----  ----  ----  ---  --------  -----  -------------  ---  ----------  -  ---------
AGA_Pleistodontes_nsp_nr_blandus_R1252_02a_uxyz     ---  -----  ---  ---  -  -----  -  -----------  -  --------  -------------  --  ---------------  -------  -----------  ------  ---  ------  --------------------  ------  ----  ----  ---------------  -----  ----------------  ---------  ----------  ----  ----------  ---- -----    --------------  -------------  ------  --------------  ------------------  -----  -----------  ---------  ------  --------  ---  -----------------  ----------------------  -------  --------------------  --- --------  ----  -----------  ---    -    ------  ----------  ------  -  ----  ----  ----  ---  --------  -----  -------------  ---  ----------  -  ---------
AGA_Pleistodontes_nsp_nr_blandus_R1252_02b_uxyz     ---  -----  ---  ---  -  -----  -  -----------  -  --------  -------------  --  ---------------  -------  -----------  ------  ---  ------  --------------------  ------  ----  ----  ---------------  -----  ----------------  ---------  ----------  ----  ----------  ---- -----    --------------  -------------  ------  --------------  ------------------  -----  -----------  ---------  ------  --------  ---  -----------------  ----------------------  -------  --------------------  --- --------  ----  -----------  ---    -    ------  ----------  ------  -  ----  ----  ----  ---  --------  -----  -------------  ---  ----------  -  ---------
AGA_Pleistodontes_nsp_R1372_01_uxyz                 ---  -----  ---  ---  -  -----  -  -----------  -  --------  -------------  --  ---------------  -------  -----------  ------  ---  ------  --------------------  ------  ----  ----  ---------------  -----  ----------------  ---------  ----------  ----  ----------  ---- -----    --------------  -------------  ------  --------------  ------------------  -----  -----------  ---------  ------  --------  ---  -----------------  ----------------------  -------  --------------------  --- --------  ----  -----------  ---    -    ------  ----------  ------  -  ----  ----  ----  ---  --------  -----  -------------  ---  ----------  -  ---------
AGA_Pleistodontes_rigisamos_R1410_01_uxyz           ---  -----  ---  ---  -  -----  -  -----------  -  --------  -------------  --  ---------------  -------  -----------  ------  ---  ------  --------------------  ------  ----  ----  ---------------  -----  ----------------  ---------  ----------  ----  ----------  ---- -----    --------------  -------------  ------  --------------  ------------------  -----  -----------  ---------  ------  --------  ---  -----------------  ----------------------  -------  --------------------  --- --------  ----  -----------  ---    -    ------  ----------  ------  -  ----  ----  ----  ---  --------  -----  -------------  ---  ----------  -  ---------
AGA_Pleistodontes_sp2_D2082_uvxyz                   ---  -----  ---  ---  -  -----  -  -----------  -  --------  -------------  --  ---------------  -------  -----------  ------  ---  ------  --------------------  ------  ----  ----  ---------------  -----  ----------------  ---------  ----------  ----  ----------  ---- -----    --------------  -------------  ------  --------------  ------------------  -----  -----------  ---------  ------  --------  ---  -----------------  ----------------------  -------  --------------------  --- --------  ----  -----------  ---    -    ------  ----------  ------  -  ----  ----  ----  ---  --------  -----  -------------  ---  ----------  -  ---------
AGA_Pleistodontes_xanthocephalus_1422_02_uxyz       ---  -----  ---  ---  -  -----  -  -----------  -  --------  -------------  --  ---------------  -------  -----------  ------  ---  ------  --------------------  ------  ----  ----  ---------------  -----  ----------------  ---------  ----------  ----  ----------  ---- -----    --------------  -------------  ------  --------------  ------------------  -----  -----------  ---------  ------  --------  ---  -----------------  ----------------------  -------  --------------------  --- --------  ----  -----------  ---    -    ------  ----------  ------  -  ----  ----  ----  ---  --------  -----  -------------  ---  ----------  -  ---------
AGA_Sycophilomorpha_nsp_R1616_03_uxyz               ---  -----  ---  ---  -  -----  -  -----------  -  --------  -------------  --  ---------------  -------  -----------  ------  ---  ------  --------------------  ------  ----  ----  ---------------  -----  ----------------  ---------  ----------  ----  ----------  ---- -----    --------------  -------------  ------  --------------  ------------------  -----  -----------  ---------  ------  --------  ---  -----------------  ----------------------  -------  --------------------  --- --------  ----  -----------  ---    -    ------  ----------  ------  -  ----  ----  ----  ---  --------  -----  -------------  ---  ----------  -  ---------
AGA_Valisia_esquirolianae_R1619_01_uxyz             ---  -----  ---  ---  -  -----  -  -----------  -  --------  -------------  --  ---------------  -------  -----------  ------  ---  ------  --------------------  ------  ----  ----  ---------------  -----  ----------------  ---------  ----------  ----  ----------  ---- -----    --------------  -------------  ------  --------------  ------------------  -----  -----------  ---------  ------  --------  ---  -----------------  ----------------------  -------  --------------------  --- --------  ----  -----------  ---    -    ------  ----------  ------  -  ----  ----  ----  ---  --------  -----  -------------  ---  ----------  -  ---------
AGA_Valisia_javana_hilli_R1745_01_uxyz              ---  -----  ---  ---  -  -----  -  -----------  -  --------  -------------  --  ---------------  -------  -----------  ------  ---  ------  --------------------  ------  ----  ----  ---------------  -----  ----------------  ---------  ----------  ----  ----------  ---- -----    --------------  -------------  ------  --------------  ------------------  -----  -----------  ---------  ------  --------  ---  -----------------  ----------------------  -------  --------------------  --- --------  ----  -----------  ---    -    ------  ----------  ------  -  ----  ----  ----  ---  --------  -----  -------------  ---  ----------  -  ---------
AGA_Valisia_nsp_R1991_01_uxyz                       ---  -----  ---  ---  -  -----  -  -----------  -  --------  -------------  --  ---------------  -------  -----------  ------  ---  ------  --------------------  ------  ----  ----  ---------------  -----  ----------------  ---------  ----------  ----  ----------  ---- -----    --------------  -------------  ------  --------------  ------------------  -----  -----------  ---------  ------  --------  ---  -----------------  ----------------------  -------  --------------------  --- --------  ----  -----------  ---    -    ------  ----------  ------  -  ----  ----  ----  ---  --------  -----  -------------  ---  ----------  -  ---------
AGA_Waterstoniella_nsp_nr_errata_R1860_01_uxyz      ---  -----  ---  ---  -  -----  -  -----------  -  --------  -------------  --  ---------------  -------  -----------  ------  ---  ------  --------------------  ------  ----  ----  ---------------  -----  ----------------  ---------  ----------  ----  ----------  ---- -----    --------------  -------------  ------  --------------  ------------------  -----  -----------  ---------  ------  --------  ---  -----------------  ----------------------  -------  --------------------  --- --------  ----  -----------  ---    -    ------  ----------  ------  -  ----  ----  ----  ---  --------  -----  -------------  ---  ----------  -  ---------
AGA_Waterstoniella_nsp_nr_malayana_R1871_01_uxyz    ---  -----  ---  ---  -  -----  -  -----------  -  --------  -------------  --  ---------------  -------  -----------  ------  ---  ------  --------------------  ------  ----  ----  ---------------  -----  ----------------  ---------  ----------  ----  ----------  ---- -----    --------------  -------------  ------  --------------  ------------------  -----  -----------  ---------  ------  --------  ---  -----------------  ----------------------  -------  --------------------  --- --------  ----  -----------  ---    -    ------  ----------  ------  -  ----  ----  ----  ---  --------  -----  -------------  ---  ----------  -  ---------
AGA_Waterstoniella_nsp_R1855_01_uxyz                ---  -----  ---  ---  -  -----  -  -----------  -  --------  -------------  --  ---------------  -------  -----------  ------  ---  ------  --------------------  ------  ----  ----  ---------------  -----  ----------------  ---------  ----------  ----  ----------  ---- -----    --------------  -------------  ------  --------------  ------------------  -----  -----------  ---------  ------  --------  ---  -----------------  ----------------------  -------  --------------------  --- --------  ----  -----------  ---    -    ------  ----------  ------  -  ----  ----  ----  ---  --------  -----  -------------  ---  ----------  -  ---------
AGA_Waterstoniella_nsp_R1876_01_uxyz                ---  -----  ---  ---  -  -----  -  -----------  -  --------  -------------  --  ---------------  -------  -----------  ------  ---  ------  --------------------  ------  ----  ----  ---------------  -----  ----------------  ---------  ----------  ----  ----------  ---- -----    --------------  -------------  ------  --------------  ------------------  -----  -----------  ---------  ------  --------  ---  -----------------  ----------------------  -------  --------------------  --- --------  ----  -----------  ---    -    ------  ----------  ------  -  ----  ----  ----  ---  --------  -----  -------------  ---  ----------  -  ---------
AGA_Waterstoniella_nsp_R1878_01_uxyz                ---  -----  ---  ---  -  -----  -  -----------  -  --------  -------------  --  ---------------  -------  -----------  ------  ---  ------  --------------------  ------  ----  ----  ---------------  -----  ----------------  ---------  ----------  ----  ----------  ---- -----    --------------  -------------  ------  --------------  ------------------  -----  -----------  ---------  ------  --------  ---  -----------------  ----------------------  -------  --------------------  --- --------  ----  -----------  ---    -    ------  ----------  ------  -  ----  ----  ----  ---  --------  -----  -------------  ---  ----------  -  ---------
AGA_Waterstoniella_nsp_R2066_01_uxz                 ---  -----  ---  ---  -  -----  -  -----------  -  --------  -------------  --  ---------------  -------  -----------  ------  ---  ------  --------------------  ------  ----  ----  ---------------  -----  ----------------  ---------  ----------  ----  ----------  ---- -----    --------------  -------------  ------  --------------  ------------------  -----  -----------  ---------  ------  --------  ---  -----------------  ----------------------  -------  --------------------  --- --------  ----  -----------  ---    -    ------  ----------  ------  -  ----  ----  ----  ---  --------  -----  -------------  ---  ----------  -  ---------
AGA_Wiebesia_contubernalis_R1905_01_uxz             ---  -----  ---  ---  -  -----  -  -----------  -  --------  -------------  --  ---------------  -------  -----------  ------  ---  ------  --------------------  ------  ----  ----  ---------------  -----  ----------------  ---------  ----------  ----  ----------  ---- -----    --------------  -------------  ------  --------------  ------------------  -----  -----------  ---------  ------  --------  ---  -----------------  ----------------------  -------  --------------------  --- --------  ----  -----------  ---    -    ------  ----------  ------  -  ----  ----  ----  ---  --------  -----  -------------  ---  ----------  -  ---------
AGA_Wiebesia_nsp_R1904_01_uxyz                      ---  -----  ---  ---  -  -----  -  -----------  -  --------  -------------  --  ---------------  -------  -----------  ------  ---  ------  --------------------  ------  ----  ----  ---------------  -----  ----------------  ---------  ----------  ----  ----------  ---- -----    --------------  -------------  ------  --------------  ------------------  -----  -----------  ---------  ------  --------  ---  -----------------  ----------------------  -------  --------------------  --- --------  ----  -----------  ---    -    ------  ----------  ------  -  ----  ----  ----  ---  --------  -----  -------------  ---  ----------  -  ---------
AGK_Ceratosolen_appendiculatus_R1423_01_uxyz        ---  -----  ---  ---  -  -----  -  -----------  -  --------  -------------  --  ---------------  -------  -----------  ------  ---  ------  --------------------  ------  ----  ----  ---------------  -----  ----------------  ---------  ----------  ----  ----------  ---- -----    --------------  -------------  ------  --------------  ------------------  -----  -----------  ---------  ------  --------  ---  -----------------  ----------------------  -------  --------------------  --- --------  ----  -----------  ---    -    ------  ----------  ------  -  ----  ----  ----  ---  --------  -----  -------------  ---  ----------  -  ---------
AGK_Ceratosolen_arabicus_R2191_01_uxyz              ---  -----  ---  ---  -  -----  -  -----------  -  --------  -------------  --  ---------------  -------  -----------  ------  ---  ------  --------------------  ------  ----  ----  ---------------  -----  ----------------  ---------  ----------  ----  ----------  ---- -----    --------------  -------------  ------  --------------  ------------------  -----  -----------  ---------  ------  --------  ---  -----------------  ----------------------  -------  --------------------  --- --------  ----  -----------  ---    -    ------  ----------  ------  -  ----  ----  ----  ---  --------  -----  -------------  ---  ----------  -  ---------
AGK_Ceratosolen_armipes_R2197_01_uxyz               ---  -----  ---  ---  -  -----  -  -----------  -  --------  -------------  --  ---------------  -------  -----------  ------  ---  ------  --------------------  ------  ----  ----  ---------------  -----  ----------------  ---------  ----------  ----  ----------  ---- -----    --------------  -------------  ------  --------------  ------------------  -----  -----------  ---------  ------  --------  ---  -----------------  ----------------------  -------  --------------------  --- --------  ----  -----------  ---    -    ------  ----------  ------  -  ----  ----  ----  ---  --------  -----  -------------  ---  ----------  -  ---------
AGK_Ceratosolen_blommersi_R1821_01_uxyz             ---  -----  ---  ---  -  -----  -  -----------  -  --------  -------------  --  ---------------  -------  -----------  ------  ---  ------  --------------------  ------  ----  ----  ---------------  -----  ----------------  ---------  ----------  ----  ----------  ---- -----    --------------  -------------  ------  --------------  ------------------  -----  -----------  ---------  ------  --------  ---  -----------------  ----------------------  -------  --------------------  --- --------  ----  -----------  ---    -    ------  ----------  ------  -  ----  ----  ----  ---  --------  -----  -------------  ---  ----------  -  ---------
AGK_Ceratosolen_emarginatus_R1910_01_uxyz           ---  -----  ---  ---  -  -----  -  -----------  -  --------  -------------  --  ---------------  -------  -----------  ------  ---  ------  --------------------  ------  ----  ----  ---------------  -----  ----------------  ---------  ----------  ----  ----------  ---- -----    --------------  -------------  ------  --------------  ------------------  -----  -----------  ---------  ------  --------  ---  -----------------  ----------------------  -------  --------------------  --- --------  ----  -----------  ---    -    ------  ----------  ------  -  ----  ----  ----  ---  --------  -----  -------------  ---  ----------  -  ---------
AGK_Ceratosolen_flabellatus_R1940_01_uxyz           ---  -----  ---  ---  -  -----  -  -----------  -  --------  -------------  --  ---------------  -------  -----------  ------  ---  ------  --------------------  ------  ----  ----  ---------------  -----  ----------------  ---------  ----------  ----  ----------  ---- -----    --------------  -------------  ------  --------------  ------------------  -----  -----------  ---------  ------  --------  ---  -----------------  ----------------------  -------  --------------------  --- --------  ----  -----------  ---    -    ------  ----------  ------  -  ----  ----  ----  ---  --------  -----  -------------  ---  ----------  -  ---------
AGK_Ceratosolen_galili_R1532_06_uxyz                ---  -----  ---  ---  -  -----  -  -----------  -  --------  -------------  --  ---------------  -------  -----------  ------  ---  ------  --------------------  ------  ----  ----  ---------------  -----  ----------------  ---------  ----------  ----  ----------  ---- -----    --------------  -------------  ------  --------------  ------------------  -----  -----------  ---------  ------  --------  ---  -----------------  ----------------------  -------  --------------------  --- --------  ----  -----------  ---    -    ------  ----------  ------  -  ----  ----  ----  ---  --------  -----  -------------  ---  ----------  -  ---------
AGK_Ceratosolen_megacephalus_R1929_01_uxyz          ---  -----  ---  ---  -  -----  -  -----------  -  --------  -------------  --  ---------------  -------  -----------  ------  ---  ------  --------------------  ------  ----  ----  ---------------  -----  ----------------  ---------  ----------  ----  ----------  ---- -----    --------------  -------------  ------  --------------  ------------------  -----  -----------  ---------  ------  --------  ---  -----------------  ----------------------  -------  --------------------  --- --------  ----  -----------  ---    -    ------  ----------  ------  -  ----  ----  ----  ---  --------  -----  -------------  ---  ----------  -  ---------
AGK_Ceratosolen_nsp_R1683_01_uxyz                   ---  -----  ---  ---  -  -----  -  -----------  -  --------  -------------  --  ---------------  -------  -----------  ------  ---  ------  --------------------  ------  ----  ----  ---------------  -----  ----------------  ---------  ----------  ----  ----------  ---- -----    --------------  -------------  ------  --------------  ------------------  -----  -----------  ---------  ------  --------  ---  -----------------  ----------------------  -------  --------------------  --- --------  ----  -----------  ---    -    ------  ----------  ------  -  ----  ----  ----  ---  --------  -----  -------------  ---  ----------  -  ---------
AGK_Ceratosolen_nsp_R1986_01_uxyz                   ---  -----  ---  ---  -  -----  -  -----------  -  --------  -------------  --  ---------------  -------  -----------  ------  ---  ------  --------------------  ------  ----  ----  ---------------  -----  ----------------  ---------  ----------  ----  ----------  ---- -----    --------------  -------------  ------  --------------  ------------------  -----  -----------  ---------  ------  --------  ---  -----------------  ----------------------  -------  --------------------  --- --------  ----  -----------  ---    -    ------  ----------  ------  -  ----  ----  ----  ---  --------  -----  -------------  ---  ----------  -  ---------
AGK_Ceratosolen_nsp_R2195_01_uxyz                   ---  -----  ---  ---  -  -----  -  -----------  -  --------  -------------  --  ---------------  -------  -----------  ------  ---  ------  --------------------  ------  ----  ----  ---------------  -----  ----------------  ---------  ----------  ----  ----------  ---- -----    --------------  -------------  ------  --------------  ------------------  -----  -----------  ---------  ------  --------  ---  -----------------  ----------------------  -------  --------------------  --- --------  ----  -----------  ---    -    ------  ----------  ------  -  ----  ----  ----  ---  --------  -----  -------------  ---  ----------  -  ---------
AGK_Ceratosolen_nsp_R2196_01_uxyz                   ---  -----  ---  ---  -  -----  -  -----------  -  --------  -------------  --  ---------------  -------  -----------  ------  ---  ------  --------------------  ------  ----  ----  ---------------  -----  ----------------  ---------  ----------  ----  ----------  ---- -----    --------------  -------------  ------  --------------  ------------------  -----  -----------  ---------  ------  --------  ---  -----------------  ----------------------  -------  --------------------  --- --------  ----  -----------  ---    -    ------  ----------  ------  -  ----  ----  ----  ---  --------  -----  -------------  ---  ----------  -  ---------
AGK_Ceratosolen_silvestrianus_R1810_02_uxyz         ---  -----  ---  ---  -  -----  -  -----------  -  --------  -------------  --  ---------------  -------  -----------  ------  ---  ------  --------------------  ------  ----  ----  ---------------  -----  ----------------  ---------  ----------  ----  ----------  ---- -----    --------------  -------------  ------  --------------  ------------------  -----  -----------  ---------  ------  --------  ---  -----------------  ----------------------  -------  --------------------  --- --------  ----  -----------  ---    -    ------  ----------  ------  -  ----  ----  ----  ---  --------  -----  -------------  ---  ----------  -  ---------
AGK_Ceratosolen_sp1_R1328_01_uxyz                   ---  -----  ---  ---  -  -----  -  -----------  -  --------  -------------  --  ---------------  -------  -----------  ------  ---  ------  --------------------  ------  ----  ----  ---------------  -----  ----------------  ---------  ----------  ----  ----------  ---- -----    --------------  -------------  ------  --------------  ------------------  -----  -----------  ---------  ------  --------  ---  -----------------  ----------------------  -------  --------------------  --- --------  ----  -----------  ---    -    ------  ----------  ------  -  ----  ----  ----  ---  --------  -----  -------------  ---  ----------  -  ---------
AGK_Ceratosolen_nr_bianchi_D1961_uvxyz              ---  -----  ---  ---  -  -----  -  -----------  -  --------  -------------  --  ---------------  -------  -----------  ------  ---  ------  --------------------  ------  ----  ----  ---------------  -----  ----------------  ---------  ----------  ----  ----------  ---- -----    --------------  -------------  ------  --------------  ------------------  -----  -----------  ---------  ------  --------  ---  -----------------  ----------------------  -------  --------------------  --- --------  ----  -----------  ---    -    ------  ----------  ------  -  ----  ----  ----  ---  --------  -----  -------------  ---  ----------  -  ---------
AGK_Ceratosolen_stupefactus_R1816_01_uxyz           ---  -----  ---  ---  -  -----  -  -----------  -  --------  -------------  --  ---------------  -------  -----------  ------  ---  ------  --------------------  ------  ----  ----  ---------------  -----  ----------------  ---------  ----------  ----  ----------  ---- -----    --------------  -------------  ------  --------------  ------------------  -----  -----------  ---------  ------  --------  ---  -----------------  ----------------------  -------  --------------------  --- --------  ----  -----------  ---    -    ------  ----------  ------  -  ----  ----  ----  ---  --------  -----  -------------  ---  ----------  -  ---------
AGK_Kradibia_commuta_R2048_01_uxz                   ---  -----  ---  ---  -  -----  -  -----------  -  --------  -------------  --  ---------------  -------  -----------  ------  ---  ------  --------------------  ------  ----  ----  ---------------  -----  ----------------  ---------  ----------  ----  ----------  ---- -----    --------------  -------------  ------  --------------  ------------------  -----  -----------  ---------  ------  --------  ---  -----------------  ----------------------  -------  --------------------  --- --------  ----  -----------  ---    -    ------  ----------  ------  -  ----  ----  ----  ---  --------  -----  -------------  ---  ----------  -  ---------
AGK_Kradibia_gestroi_afrum_R2186_01_uxyz            ---  -----  ---  ---  -  -----  -  -----------  -  --------  -------------  --  ---------------  -------  -----------  ------  ---  ------  --------------------  ------  ----  ----  ---------------  -----  ----------------  ---------  ----------  ----  ----------  ---- -----    --------------  -------------  ------  --------------  ------------------  -----  -----------  ---------  ------  --------  ---  -----------------  ----------------------  -------  --------------------  --- --------  ----  -----------  ---    -    ------  ----------  ------  -  ----  ----  ----  ---  --------  -----  -------------  ---  ----------  -  ---------
AGK_Kradibia_ghigii_R1420_02_uxyz                   ---  -----  ---  ---  -  -----  -  -----------  -  --------  -------------  --  ---------------  -------  -----------  ------  ---  ------  --------------------  ------  ----  ----  ---------------  -----  ----------------  ---------  ----------  ----  ----------  ---- -----    --------------  -------------  ------  --------------  ------------------  -----  -----------  ---------  ------  --------  ---  -----------------  ----------------------  -------  --------------------  --- --------  ----  -----------  ---    -    ------  ----------  ------  -  ----  ----  ----  ---  --------  -----  -------------  ---  ----------  -  ---------
AGK_Kradibia_nsp_R1247_01_uxz                       ---  -----  ---  ---  -  -----  -  -----------  -  --------  -------------  --  ---------------  -------  -----------  ------  ---  ------  --------------------  ------  ----  ----  ---------------  -----  ----------------  ---------  ----------  ----  ----------  ---- -----    --------------  -------------  ------  --------------  ------------------  -----  -----------  ---------  ------  --------  ---  -----------------  ----------------------  -------  --------------------  --- --------  ----  -----------  ---    -    ------  ----------  ------  -  ----  ----  ----  ---  --------  -----  -------------  ---  ----------  -  ---------
AGK_Kradibia_nsp_R1864_01_uxyz                      ---  -----  ---  ---  -  -----  -  -----------  -  --------  -------------  --  ---------------  -------  -----------  ------  ---  ------  --------------------  ------  ----  ----  ---------------  -----  ----------------  ---------  ----------  ----  ----------  ---- -----    --------------  -------------  ------  --------------  ------------------  -----  -----------  ---------  ------  --------  ---  -----------------  ----------------------  -------  --------------------  --- --------  ----  -----------  ---    -    ------  ----------  ------  -  ----  ----  ----  ---  --------  -----  -------------  ---  ----------  -  ---------
AGK_Kradibia_sp_R1920_01_uxyz                       ---  -----  ---  ---  -  -----  -  -----------  -  --------  -------------  --  ---------------  -------  -----------  ------  ---  ------  --------------------  ------  ----  ----  ---------------  -----  ----------------  ---------  ----------  ----  ----------  ---- -----    --------------  -------------  ------  --------------  ------------------  -----  -----------  ---------  ------  --------  ---  -----------------  ----------------------  -------  --------------------  --- --------  ----  -----------  ---    -    ------  ----------  ------  -  ----  ----  ----  ---  --------  -----  -------------  ---  ----------  -  ---------
AGK_Liporrhopalum_nsp_R2063_01_uxz                  ---  -----  ---  ---  -  -----  -  -----------  -  --------  -------------  --  ---------------  -------  -----------  ------  ---  ------  --------------------  ------  ----  ----  ---------------  -----  ----------------  ---------  ----------  ----  ----------  ---- -----    --------------  -------------  ------  --------------  ------------------  -----  -----------  ---------  ------  --------  ---  -----------------  ----------------------  -------  --------------------  --- --------  ----  -----------  ---    -    ------  ----------  ------  -  ----  ----  ----  ---  --------  -----  -------------  ---  ----------  -  ---------
AGK_Liporrhopalum_rutherforti_R1868_01_uxyz         ---  -----  ---  ---  -  -----  -  -----------  -  --------  -------------  --  ---------------  -------  -----------  ------  ---  ------  --------------------  ------  ----  ----  ---------------  -----  ----------------  ---------  ----------  ----  ----------  ---- -----    --------------  -------------  ------  --------------  ------------------  -----  -----------  ---------  ------  --------  ---  -----------------  ----------------------  -------  --------------------  --- --------  ----  -----------  ---    -    ------  ----------  ------  -  ----  ----  ----  ---  --------  -----  -------------  ---  ----------  -  ---------
AGK_Liporrhopalum_sessilis_R1263_01_uxyz            ---  -----  ---  ---  -  -----  -  -----------  -  --------  -------------  --  ---------------  -------  -----------  ------  ---  ------  --------------------  ------  ----  ----  ---------------  -----  ----------------  ---------  ----------  ----  ----------  ---- -----    --------------  -------------  ------  --------------  ------------------  -----  -----------  ---------  ------  --------  ---  -----------------  ----------------------  -------  --------------------  --- --------  ----  -----------  ---    -    ------  ----------  ------  -  ----  ----  ----  ---  --------  -----  -------------  ---  ----------  -  ---------
AGT_Tetrapus_ecuadoranus_R2180_01_uxyz              ---  -----  ---  ---  -  -----  -  -----------  -  --------  -------------  --  ---------------  -------  -----------  ------  ---  ------  --------------------  ------  ----  ----  ---------------  -----  ----------------  ---------  ----------  ----  ----------  ---- -----    --------------  -------------  ------  --------------  ------------------  -----  -----------  ---------  ------  --------  ---  -----------------  ----------------------  -------  --------------------  --- --------  ----  -----------  ---    -    ------  ----------  ------  -  ----  ----  ----  ---  --------  -----  -------------  ---  ----------  -  ---------
AGT_Tetrapus_nsp_R1953_01_uxyz                      ---  -----  ---  ---  -  -----  -  -----------  -  --------  -------------  --  ---------------  -------  -----------  ------  ---  ------  --------------------  ------  ----  ----  ---------------  -----  ----------------  ---------  ----------  ----  ----------  ---- -----    --------------  -------------  ------  --------------  ------------------  -----  -----------  ---------  ------  --------  ---  -----------------  ----------------------  -------  --------------------  --- --------  ----  -----------  ---    -    ------  ----------  ------  -  ----  ----  ----  ---  --------  -----  -------------  ---  ----------  -  ---------
AGT_Tetrapus_nsp_R2161_01_uxyz                      ---  -----  ---  ---  -  -----  -  -----------  -  --------  -------------  --  ---------------  -------  -----------  ------  ---  ------  --------------------  ------  ----  ----  ---------------  -----  ----------------  ---------  ----------  ----  ----------  ---- -----    --------------  -------------  ------  --------------  ------------------  -----  -----------  ---------  ------  --------  ---  -----------------  ----------------------  -------  --------------------  --- --------  ----  -----------  ---    -    ------  ----------  ------  -  ----  ----  ----  ---  --------  -----  -------------  ---  ----------  -  ---------
AGT_Tetrapus_nsp_R2185_01_uxyz                      ---  -----  ---  ---  -  -----  -  -----------  -  --------  -------------  --  ---------------  -------  -----------  ------  ---  ------  --------------------  ------  ----  ----  ---------------  -----  ----------------  ---------  ----------  ----  ----------  ---- -----    --------------  -------------  ------  --------------  ------------------  -----  -----------  ---------  ------  --------  ---  -----------------  ----------------------  -------  --------------------  --- --------  ----  -----------  ---    -    ------  ----------  ------  -  ----  ----  ----  ---  --------  -----  -------------  ---  ----------  -  ---------
APA_Aphelinus_asychis_D0961_uxyz                    ---  -----  ---  ---  -  -----  -  -----------  -  --------  -------------  --  ---------------  -------  -----------  ------  ---  ------  --------------------  ------  ----  ----  ---------------  -----  ----------------  ---------  ----------  ----  ----------  ---- -----    --------------  -------------  ------  --------------  ------------------  -----  -----------  ---------  ------  --------  ---  -----------------  ----------------------  -------  --------------------  --- --------  ----  -----------  ---    -    ------  ----------  ------  -  ----  ----  ----  ---  --------  -----  -------------  ---  ----------  -  ---------
APA_Aphelinus_kurdjomovi_D0957_tuvxy                TAC  CTGGT  TGA  TCC  T  GCCAG  T  AGTCATATGCT  T  GTCTCAAA  GATTAAGCCATGC  AT  GTCTCAGTGCATGCC  AAATTAA  GGTGAAACCGC  GAATGG  CTC  ATTAAA  TCAGTTATGGTTCCTTAGAT  CGTACC  CACA  TTTA  CTTGGATAACTGTGG  TAATT  CTAGAGCTAATACATG  CAAACCAGA  GTTCCGACCA  GAGA  TGGAAGGAAC  GCTT TTATT    AGATCAAAACCAAT  CGGTGG-CGGG--  ct--tg  --CTCGT-CCACCG  TTTACCTTGGTGACTCTG  AATAA  CTTTGTGCTGA  TCGCACGGT  CTC-GC  ACCGGCGA  CGC  ATCTTTCAAATGTCTGC  CTTATCAACTGTCGATGGTAGG  TTCTGCG  CCTACCATGGTTGTAACGGG  TAA CGGGGAAT  CAGG  GTTCGATTCCG  GAG    A    GGGAGC  CTGAGAAACG  GCTACC  A  CATC  CAAG  GAAG  GCA  GCAGGCGC  GCAAA  TTACCCACTCCCG  GCA  CGGGGAGGTA  G  TGACGAAAA
APA_Aphelinus_sp_D2705_vxyz                         ---  -----  ---  ---  -  -----  -  -----------  -  --------  -------------  --  ---------------  -------  -----------  ------  ---  ------  --------------------  ------  ----  ----  ---------------  -----  ----------------  ---------  ----------  ----  ----------  ---- -----    --------------  -------------  ------  --------------  ------------------  -----  -----------  ---------  ------  --------  ---  -----------------  ----------------------  -------  --------------------  --- --------  ----  -----------  ---    -    ------  ----------  ------  -  ----  ----  ----  ---  --------  -----  -------------  ---  ----------  -  ---------
APA_Aphytis_holoxanthus_D2938_xy                    ---  -----  ---  ---  -  -----  -  -----------  -  --------  -------------  --  ---------------  -------  -----------  ------  ---  ------  --------------------  ------  ----  ----  ---------------  -----  ----------------  ---------  ----------  ----  ----------  ---- -----    --------------  -------------  ------  --------------  ------------------  -----  -----------  ---------  ------  --------  ---  -----------------  ----------------------  -------  --------------------  --- --------  ----  -----------  ---    -    ------  ----------  ------  -  ----  ----  ----  ---  --------  -----  -------------  ---  ----------  -  ---------
APA_Aphytis_lingnanensis_D2939_uxy                  ---  -----  ---  ---  -  -----  -  -----------  -  --------  -------------  --  ---------------  -------  -----------  ------  ---  ------  --------------------  ------  ----  ----  ---------------  -----  ----------------  ---------  ----------  ----  ----------  ---- -----    --------------  -------------  ------  --------------  ------------------  -----  -----------  ---------  ------  --------  ---  -----------------  ----------------------  -------  --------------------  --- --------  ----  -----------  ---    -    ------  ----------  ------  -  ----  ----  ----  ---  --------  -----  -------------  ---  ----------  -  ---------
APA_Aphytis_melinus_a_D0326_xy                      ---  -----  ---  ---  -  -----  -  -----------  -  --------  -------------  --  ---------------  -------  -----------  ------  ---  ------  --------------------  ------  ----  ----  ---------------  -----  ----------------  ---------  ----------  ----  ----------  ---- -----    --------------  -------------  ------  --------------  ------------------  -----  -----------  ---------  ------  --------  ---  -----------------  ----------------------  -------  --------------------  --- --------  ----  -----------  ---    -    ------  ----------  ------  -  ----  ----  ----  ---  --------  -----  -------------  ---  ----------  -  ---------
APA_Aphytis_melinus_b_KD035_xy                      ---  -----  ---  ---  -  -----  -  -----------  -  --------  -------------  --  ---------------  -------  -----------  ------  ---  ------  --------------------  ------  ----  ----  ---------------  -----  ----------------  ---------  ----------  ----  ----------  ---- -----    --------------  -------------  ------  --------------  ------------------  -----  -----------  ---------  ------  --------  ---  -----------------  ----------------------  -------  --------------------  --- --------  ----  -----------  ---    -    ------  ----------  ------  -  ----  ----  ----  ---  --------  -----  -------------  ---  ----------  -  ---------
APA_Aphytis_melinus_c_xy                            ---  -----  ---  ---  -  -----  -  -----------  -  --------  -------------  --  ---------------  -------  -----------  ------  ---  ------  --------------------  ------  ----  ----  ---------------  -----  ----------------  ---------  ----------  ----  ----------  ---- -----    --------------  -------------  ------  --------------  ------------------  -----  -----------  ---------  ------  --------  ---  -----------------  ----------------------  -------  --------------------  --- --------  ----  -----------  ---    -    ------  ----------  ------  -  ----  ----  ----  ---  --------  -----  -------------  ---  ----------  -  ---------
APA_Centrodora_sp1_D0823_uvxyz                      ---  -----  ---  ---  -  -----  -  -----------  -  --------  -------------  --  ---------------  -------  -----------  ------  ---  ------  --------------------  ------  ----  ----  ---------------  -----  ----------------  ---------  ----------  ----  ----------  ---- -----    --------------  -------------  ------  --------------  ------------------  -----  -----------  ---------  ------  --------  ---  -----------------  ----------------------  -------  --------------------  --- --------  ----  -----------  ---    -    ------  ----------  ------  -  ----  ----  ----  ---  --------  -----  -------------  ---  ----------  -  ---------
APA_Centrodora_sp2_D0825_uvxyz                      ---  -----  ---  ---  -  -----  -  -----------  -  --------  -------------  --  ---------------  -------  -----------  ------  ---  ------  --------------------  ------  ----  ----  ---------------  -----  ----------------  ---------  ----------  ----  ----------  ---- -----    --------------  -------------  ------  --------------  ------------------  -----  -----------  ---------  ------  --------  ---  -----------------  ----------------------  -------  --------------------  --- --------  ----  -----------  ---    -    ------  ----------  ------  -  ----  ----  ----  ---  --------  -----  -------------  ---  ----------  -  ---------
APA_Centrodora_sp3_D1034_xy                         ---  -----  ---  ---  -  -----  -  -----------  -  --------  -------------  --  ---------------  -------  -----------  ------  ---  ------  --------------------  ------  ----  ----  ---------------  -----  ----------------  ---------  ----------  ----  ----------  ---- -----    --------------  -------------  ------  --------------  ------------------  -----  -----------  ---------  ------  --------  ---  -----------------  ----------------------  -------  --------------------  --- --------  ----  -----------  ---    -    ------  ----------  ------  -  ----  ----  ----  ---  --------  -----  -------------  ---  ----------  -  ---------
APA_Centrodora_sp4_D2293_uxz                        ---  -----  ---  ---  -  -----  -  -----------  -  --------  -------------  --  ---------------  -------  -----------  ------  ---  ------  --------------------  ------  ----  ----  ---------------  -----  ----------------  ---------  ----------  ----  ----------  ---- -----    --------------  -------------  ------  --------------  ------------------  -----  -----------  ---------  ------  --------  ---  -----------------  ----------------------  -------  --------------------  --- --------  ----  -----------  ---    -    ------  ----------  ------  -  ----  ----  ----  ---  --------  -----  -------------  ---  ----------  -  ---------
APA_Centrodora_sp5_D2339_uvxyz                      ---  -----  ---  ---  -  -----  -  -----------  -  --------  -------------  --  ---------------  -------  -----------  ------  ---  ------  --------------------  ------  ----  ----  ---------------  -----  ----------------  ---------  ----------  ----  ----------  ---- -----    --------------  -------------  ------  --------------  ------------------  -----  -----------  ---------  ------  --------  ---  -----------------  ----------------------  -------  --------------------  --- --------  ----  -----------  ---    -    ------  ----------  ------  -  ----  ----  ----  ---  --------  -----  -------------  ---  ----------  -  ---------
APA_Centrodora_sp6_D2700_vxyz                       ---  -----  ---  ---  -  -----  -  -----------  -  --------  -------------  --  ---------------  -------  -----------  ------  ---  ------  --------------------  ------  ----  ----  ---------------  -----  ----------------  ---------  ----------  ----  ----------  ---- -----    --------------  -------------  ------  --------------  ------------------  -----  -----------  ---------  ------  --------  ---  -----------------  ----------------------  -------  --------------------  --- --------  ----  -----------  ---    -    ------  ----------  ------  -  ----  ----  ----  ---  --------  -----  -------------  ---  ----------  -  ---------
APE_Eretmocerus_eremicus_D0808_tuvxyz               TAC  CTGGT  TGA  TCC  T  GCCAG  T  AGTCATATGCT  T  GTCTCAAA  GATTAAGCCATGC  AT  GTCTCAGTGCATGCC  GAATTAA  GGTGAAACCGC  GAATGG  CTC  ATTAAA  TCAGTTATGGTTCCTTAGAT  CGTACC  CACA  TTTA  CTTGGATAACTGTGG  TAATT  CTAGAGCTAATACATG  CAAACCAGA  GTTCCGACCA  GAGA  TGGAAGGAAC  GCTT TTATT    AGATCAAAACCAAT  CGGTGG-CGGG--  tt--cg  --CTCGT-CCACCG  TTTACCTTGGTGACTCTG  AATAA  CTTTGTGCTGA  TCGCACGGT  CTC-GT  ACCGGCGA  CGC  ATCTTTCAAATGTCTGC  CTTATCAACTTACGATGGTAGG  TTCTGCG  CCTACCATGGTTGTAACGGG  TAA CGGGGAAT  CAGG  GTTCGATTCCG  GAG    A    GGGAGC  CTGAGAAACG  GCTACC  A  CATC  CAAG  GAAG  GCA  GCAGGCGC  GCAAA  TTACCCACTCCCG  GCA  CGGGGAGGTA  G  TGACGAAAA
APE_Eretmocerus_mundus_GenBank_xy                   ---  -----  ---  ---  -  -----  -  -----------  -  --------  -------------  --  ---------------  -------  -----------  ------  ---  ------  --------------------  ------  ----  ----  ---------------  -----  ----------------  ---------  ----------  ----  ----------  ---- -----    --------------  -------------  ------  --------------  ------------------  -----  -----------  ---------  ------  --------  ---  -----------------  ----------------------  -------  --------------------  --- --------  ----  -----------  ---    -    ------  ----------  ------  -  ----  ----  ----  ---  --------  -----  -------------  ---  ----------  -  ---------
APE_Eretmocerus_queenslandensis_GenBank_xy          ---  -----  ---  ---  -  -----  -  -----------  -  --------  -------------  --  ---------------  -------  -----------  ------  ---  ------  --------------------  ------  ----  ----  ---------------  -----  ----------------  ---------  ----------  ----  ----------  ---- -----    --------------  -------------  ------  --------------  ------------------  -----  -----------  ---------  ------  --------  ---  -----------------  ----------------------  -------  --------------------  --- --------  ----  -----------  ---    -    ------  ----------  ------  -  ----  ----  ----  ---  --------  -----  -------------  ---  ----------  -  ---------
APE_Eretmocerus_sp1_D2934_xy                        ---  -----  ---  ---  -  -----  -  -----------  -  --------  -------------  --  ---------------  -------  -----------  ------  ---  ------  --------------------  ------  ----  ----  ---------------  -----  ----------------  ---------  ----------  ----  ----------  ---- -----    --------------  -------------  ------  --------------  ------------------  -----  -----------  ---------  ------  --------  ---  -----------------  ----------------------  -------  --------------------  --- --------  ----  -----------  ---    -    ------  ----------  ------  -  ----  ----  ----  ---  --------  -----  -------------  ---  ----------  -  ---------
APE_Eretmocerus_sp2_D2199_uvxyz                     ---  -----  ---  ---  -  -----  -  -----------  -  --------  -------------  --  ---------------  -------  -----------  ------  ---  ------  --------------------  ------  ----  ----  ---------------  -----  ----------------  ---------  ----------  ----  ----------  ---- -----    --------------  -------------  ------  --------------  ------------------  -----  -----------  ---------  ------  --------  ---  -----------------  ----------------------  -------  --------------------  --- --------  ----  -----------  ---    -    ------  ----------  ------  -  ----  ----  ----  ---  --------  -----  -------------  ---  ----------  -  ---------
APA_Eutrichosomella_sp_KD434_uxy                    ---  -----  ---  ---  -  -----  -  -----------  -  --------  -------------  --  ---------------  -------  -----------  ------  ---  ------  --------------------  ------  ----  ----  ---------------  -----  ----------------  ---------  ----------  ----  ----------  ---- -----    --------------  -------------  ------  --------------  ------------------  -----  -----------  ---------  ------  --------  ---  -----------------  ----------------------  -------  --------------------  --- --------  ----  -----------  ---    -    ------  ----------  ------  -  ----  ----  ----  ---  --------  -----  -------------  ---  ----------  -  ---------
APA_Marietta_carnesi_D2936_xy                       ---  -----  ---  ---  -  -----  -  -----------  -  --------  -------------  --  ---------------  -------  -----------  ------  ---  ------  --------------------  ------  ----  ----  ---------------  -----  ----------------  ---------  ----------  ----  ----------  ---- -----    --------------  -------------  ------  --------------  ------------------  -----  -----------  ---------  ------  --------  ---  -----------------  ----------------------  -------  --------------------  --- --------  ----  -----------  ---    -    ------  ----------  ------  -  ----  ----  ----  ---  --------  -----  -------------  ---  ----------  -  ---------
APA_Marietta_leopardina_D2935_xy                    ---  -----  ---  ---  -  -----  -  -----------  -  --------  -------------  --  ---------------  -------  -----------  ------  ---  ------  --------------------  ------  ----  ----  ---------------  -----  ----------------  ---------  ----------  ----  ----------  ---- -----    --------------  -------------  ------  --------------  ------------------  -----  -----------  ---------  ------  --------  ---  -----------------  ----------------------  -------  --------------------  --- --------  ----  -----------  ---    -    ------  ----------  ------  -  ----  ----  ----  ---  --------  -----  -------------  ---  ----------  -  ---------
APA_Marietta_sp_D0593_vxyz                          ---  -----  ---  ---  -  -----  -  -----------  -  --------  -------------  --  ---------------  -------  -----------  ------  ---  ------  --------------------  ------  ----  ----  ---------------  -----  ----------------  ---------  ----------  ----  ----------  ---- -----    --------------  -------------  ------  --------------  ------------------  -----  -----------  ---------  ------  --------  ---  -----------------  ----------------------  -------  --------------------  --- --------  ----  -----------  ---    -    ------  ----------  ------  -  ----  ----  ----  ---  --------  -----  -------------  ---  ----------  -  ---------
APA_Samariola_sp_D2748_uxyz                         ---  -----  ---  ---  -  -----  -  -----------  -  --------  -------------  --  ---------------  -------  -----------  ------  ---  ------  --------------------  ------  ----  ----  ---------------  -----  ----------------  ---------  ----------  ----  ----------  ---- -----    --------------  -------------  ------  --------------  ------------------  -----  -----------  ---------  ------  --------  ---  -----------------  ----------------------  -------  --------------------  --- --------  ----  -----------  ---    -    ------  ----------  ------  -  ----  ----  ----  ---  --------  -----  -------------  ---  ----------  -  ---------
APC_Coccobius_fulvus_D1900_tuvxyz                   TAC  CTGGT  TGA  TCC  T  GCCAG  T  AGTCATATGCT  T  GTCTCAAA  GATTAAGCCATGC  AT  GTCTCAGTGCATGCC  GCATTAA  GGTGAAACCGC  GAATGG  CTC  ATTAAA  TCAGTTATGGTTCCTTAGAT  CGTACC  CACA  TTTA  CTTGGATAACTGTGG  TAATT  CTAGAGCTAATACATG  CAAACCAGA  GTTCCGACCA  GAGA  TGGAAGGAAC  GCTT TTATT    AGATCAAAACCAAT  CGGTGG-CGGG--  tt--cg  --CTCGT-CCACCG  TTTACCTTGGTGACTCTG  AATAA  CTTTGTGCTGA  TCGCATGGT  CTC-GC  ACCGGCGA  CGC  ATCTTTCAAATGTCTGC  CTTATCAACTGTCGATGGTAGG  TTCTGCG  CCTACCATGGTTGTAACGGG  TAA CGGGGAAT  CAGG  GTTCGATTCCG  GAG    A    GGGAGC  CTGAGAAACG  GCTACC  A  CATC  CAAG  GAAG  GCA  GCAGGCGC  GCAAA  TTACCCACTCCCG  GCA  CGGGGAGGTA  G  TGACGAAAA
APC_Coccobius_sp1_D1060_xy                          ---  -----  ---  ---  -  -----  -  -----------  -  --------  -------------  --  ---------------  -------  -----------  ------  ---  ------  --------------------  ------  ----  ----  ---------------  -----  ----------------  ---------  ----------  ----  ----------  ---- -----    --------------  -------------  ------  --------------  ------------------  -----  -----------  ---------  ------  --------  ---  -----------------  ----------------------  -------  --------------------  --- --------  ----  -----------  ---    -    ------  ----------  ------  -  ----  ----  ----  ---  --------  -----  -------------  ---  ----------  -  ---------
APC_Coccobius_sp2_D1063_uvxy                        ---  -----  ---  ---  -  -----  -  -----------  -  --------  -------------  --  ---------------  -------  -----------  ------  ---  ------  --------------------  ------  ----  ----  ---------------  -----  ----------------  ---------  ----------  ----  ----------  ---- -----    --------------  -------------  ------  --------------  ------------------  -----  -----------  ---------  ------  --------  ---  -----------------  ----------------------  -------  --------------------  --- --------  ----  -----------  ---    -    ------  ----------  ------  -  ----  ----  ----  ---  --------  -----  -------------  ---  ----------  -  ---------
APC_Coccobius_sp3_D1387_uvxy                        ---  -----  ---  ---  -  -----  -  -----------  -  --------  -------------  --  ---------------  -------  -----------  ------  ---  ------  --------------------  ------  ----  ----  ---------------  -----  ----------------  ---------  ----------  ----  ----------  ---- -----    --------------  -------------  ------  --------------  ------------------  -----  -----------  ---------  ------  --------  ---  -----------------  ----------------------  -------  --------------------  --- --------  ----  -----------  ---    -    ------  ----------  ------  -  ----  ----  ----  ---  --------  -----  -------------  ---  ----------  -  ---------
APC_Coccobius_sp4_D1492_uvxy                        ---  -----  ---  ---  -  -----  -  -----------  -  --------  -------------  --  ---------------  -------  -----------  ------  ---  ------  --------------------  ------  ----  ----  ---------------  -----  ----------------  ---------  ----------  ----  ----------  ---- -----    --------------  -------------  ------  --------------  ------------------  -----  -----------  ---------  ------  --------  ---  -----------------  ----------------------  -------  --------------------  --- --------  ----  -----------  ---    -    ------  ----------  ------  -  ----  ----  ----  ---  --------  -----  -------------  ---  ----------  -  ---------
APC_Coccobius_sp5_D2702_vxyz                        ---  -----  ---  ---  -  -----  -  -----------  -  --------  -------------  --  ---------------  -------  -----------  ------  ---  ------  --------------------  ------  ----  ----  ---------------  -----  ----------------  ---------  ----------  ----  ----------  ---- -----    --------------  -------------  ------  --------------  ------------------  -----  -----------  ---------  ------  --------  ---  -----------------  ----------------------  -------  --------------------  --- --------  ----  -----------  ---    -    ------  ----------  ------  -  ----  ----  ----  ---  --------  -----  -------------  ---  ----------  -  ---------
APC_Coccobius_sp6_D2703_vxyz                        ---  -----  ---  ---  -  -----  -  -----------  -  --------  -------------  --  ---------------  -------  -----------  ------  ---  ------  --------------------  ------  ----  ----  ---------------  -----  ----------------  ---------  ----------  ----  ----------  ---- -----    --------------  -------------  ------  --------------  ------------------  -----  -----------  ---------  ------  --------  ---  -----------------  ----------------------  -------  --------------------  --- --------  ----  -----------  ---    -    ------  ----------  ------  -  ----  ----  ----  ---  --------  -----  -------------  ---  ----------  -  ---------
APC_Coccobius_sp7_D2706_vxyz                        ---  -----  ---  ---  -  -----  -  -----------  -  --------  -------------  --  ---------------  -------  -----------  ------  ---  ------  --------------------  ------  ----  ----  ---------------  -----  ----------------  ---------  ----------  ----  ----------  ---- -----    --------------  -------------  ------  --------------  ------------------  -----  -----------  ---------  ------  --------  ---  -----------------  ----------------------  -------  --------------------  --- --------  ----  -----------  ---    -    ------  ----------  ------  -  ----  ----  ----  ---  --------  -----  -------------  ---  ----------  -  ---------
APC_Coccophagoides_fuscipennis_D0571_tuvxyz         TAC  CTGGT  TGA  TCC  T  GCCAG  T  AGTCATATGCT  T  GTCTCAAA  GATTAAGCCATGC  AT  GTCTCAGTGCAAGCC  ACATTAA  GGTGAAACCGC  GAATGG  CTC  ATTAAA  TCAGTTATGGTTCCTTAGAT  CGTACC  CACA  TTTA  CTTGGATAACTGTGG  TAATT  CTAGAGCTAATACATG  CAAACCAGA  GTTCCAACCA  GAGA  TGGAAGGAAC  GCTT TTATT    AGATCAAAACCAAT  CGGTGG-CGGGC-  tc--ac  -GCTCGT-CCACCG  TTTACCTTGGTGACTCTG  AATAA  CTTTGTGCTGA  TCGCATGGT  CTC-GT  ACCGGCGA  CGC  ATCTTTCAAATGTCTGC  CTTATCAACTGTCGATGGTAGG  TTCTGCG  CCTACCATGGTTGTAACGGG  TAA CGGGGAAT  CAGG  GTTCGATTCCG  GAG    A    GGGAGC  CTGAGAAACG  GCTACC  A  CATC  CAAG  GAAG  GCA  GCAGGCGC  GCAAA  TTACCCACTCCCG  GCA  CGGGGAGGTA  G  TGACGAAAA
APC_Coccophagus_rusti_D1056_tuvxyz                  TAC  CTGGT  TGA  TCC  T  GCCAG  T  AGTCATATGCT  T  GTCTCAAA  GATTAAGCCATGC  AT  GTCTCAGTGCATGCC  GCATTAA  GGTGAAACCGC  GAATGG  CTC  ATTAAA  TCAGTTATGGTTCCTTAGAT  CGTACC  CACA  TTTA  CTTGGATAACTGTGG  TAATT  CTAGAGCTAATACATG  CAAACCAGA  GTTCCGACCA  GAGA  TGGAAGGAAC  GCTT TTATT    AGATCAAAACCAAT  CGGTGG-CGGGT-  t---ct  -GCTCGT-CCACCG  TTTACCTTGGTGACTCTG  AATAA  CTTTGTGCTGA  TCGCATGGT  CTC-GC  ACCGGCGA  CGC  ATCTTTCAAATGTCTGC  CTTATCAACTGTCGATGGTAGG  TTCTGCG  CCTACCATGGTTGTAACGGG  TAA CGGGGAAT  CAGG  GTTCGATTCCG  GAG    A    GGGAGC  CTGAGAAACG  GCTACC  A  CATC  CAAG  GAAG  GCA  GCAGGCGC  GCAAA  TTACCCACTCCCG  GCA  CGGGGAGGTA  G  TGACGAAAA
APC_Coccophagus_scutellaris_D1601_uvxy              ---  -----  ---  ---  -  -----  -  -----------  -  --------  -------------  --  ---------------  -------  -----------  ------  ---  ------  --------------------  ------  ----  ----  ---------------  -----  ----------------  ---------  ----------  ----  ----------  ---- -----    --------------  -------------  ------  --------------  ------------------  -----  -----------  ---------  ------  --------  ---  -----------------  ----------------------  -------  --------------------  --- --------  ----  -----------  ---    -    ------  ----------  ------  -  ----  ----  ----  ---  --------  -----  -------------  ---  ----------  -  ---------
APC_Coccophagus_sp_1_D0560_uvxyz                    ---  -----  ---  ---  -  -----  -  -----------  -  --------  -------------  --  ---------------  -------  -----------  ------  ---  ------  --------------------  ------  ----  ----  ---------------  -----  ----------------  ---------  ----------  ----  ----------  ---- -----    --------------  -------------  ------  --------------  ------------------  -----  -----------  ---------  ------  --------  ---  -----------------  ----------------------  -------  --------------------  --- --------  ----  -----------  ---    -    ------  ----------  ------  -  ----  ----  ----  ---  --------  -----  -------------  ---  ----------  -  ---------
APC_Coccophagus_sp_2_D0577_uvxy                     ---  -----  ---  ---  -  -----  -  -----------  -  --------  -------------  --  ---------------  -------  -----------  ------  ---  ------  --------------------  ------  ----  ----  ---------------  -----  ----------------  ---------  ----------  ----  ----------  ---- -----    --------------  -------------  ------  --------------  ------------------  -----  -----------  ---------  ------  --------  ---  -----------------  ----------------------  -------  --------------------  --- --------  ----  -----------  ---    -    ------  ----------  ------  -  ----  ----  ----  ---  --------  -----  -------------  ---  ----------  -  ---------
APC_Coccophagus_sp_3_D1036_uvxy                     ---  -----  ---  ---  -  -----  -  -----------  -  --------  -------------  --  ---------------  -------  -----------  ------  ---  ------  --------------------  ------  ----  ----  ---------------  -----  ----------------  ---------  ----------  ----  ----------  ---- -----    --------------  -------------  ------  --------------  ------------------  -----  -----------  ---------  ------  --------  ---  -----------------  ----------------------  -------  --------------------  --- --------  ----  -----------  ---    -    ------  ----------  ------  -  ----  ----  ----  ---  --------  -----  -------------  ---  ----------  -  ---------
APC_Dirphys_sp_D2672_xyz                            ---  -----  ---  ---  -  -----  -  -----------  -  --------  -------------  --  ---------------  -------  -----------  ------  ---  ------  --------------------  ------  ----  ----  ---------------  -----  ----------------  ---------  ----------  ----  ----------  ---- -----    --------------  -------------  ------  --------------  ------------------  -----  -----------  ---------  ------  --------  ---  -----------------  ----------------------  -------  --------------------  --- --------  ----  -----------  ---    -    ------  ----------  ------  -  ----  ----  ----  ---  --------  -----  -------------  ---  ----------  -  ---------
APC_Encarsia_bimaculata_D0152_uxy                   ---  -----  ---  ---  -  -----  -  -----------  -  --------  -------------  --  ---------------  -------  -----------  ------  ---  ------  --------------------  ------  ----  ----  ---------------  -----  ----------------  ---------  ----------  ----  ----------  ---- -----    --------------  -------------  ------  --------------  ------------------  -----  -----------  ---------  ------  --------  ---  -----------------  ----------------------  -------  --------------------  --- --------  ----  -----------  ---    -    ------  ----------  ------  -  ----  ----  ----  ---  --------  -----  -------------  ---  ----------  -  ---------
APC_Encarsia_cibcensis_D0461_xy                     ---  -----  ---  ---  -  -----  -  -----------  -  --------  -------------  --  ---------------  -------  -----------  ------  ---  ------  --------------------  ------  ----  ----  ---------------  -----  ----------------  ---------  ----------  ----  ----------  ---- -----    --------------  -------------  ------  --------------  ------------------  -----  -----------  ---------  ------  --------  ---  -----------------  ----------------------  -------  --------------------  --- --------  ----  -----------  ---    -    ------  ----------  ------  -  ----  ----  ----  ---  --------  -----  -------------  ---  ----------  -  ---------
APC_Encarsia_citrina_D0272_xy                       ---  -----  ---  ---  -  -----  -  -----------  -  --------  -------------  --  ---------------  -------  -----------  ------  ---  ------  --------------------  ------  ----  ----  ---------------  -----  ----------------  ---------  ----------  ----  ----------  ---- -----    --------------  -------------  ------  --------------  ------------------  -----  -----------  ---------  ------  --------  ---  -----------------  ----------------------  -------  --------------------  --- --------  ----  -----------  ---    -    ------  ----------  ------  -  ----  ----  ----  ---  --------  -----  -------------  ---  ----------  -  ---------
APC_Encarsia_formosa_D0302_xy                       ---  -----  ---  ---  -  -----  -  -----------  -  --------  -------------  --  ---------------  -------  -----------  ------  ---  ------  --------------------  ------  ----  ----  ---------------  -----  ----------------  ---------  ----------  ----  ----------  ---- -----    --------------  -------------  ------  --------------  ------------------  -----  -----------  ---------  ------  --------  ---  -----------------  ----------------------  -------  --------------------  --- --------  ----  -----------  ---    -    ------  ----------  ------  -  ----  ----  ----  ---  --------  -----  -------------  ---  ----------  -  ---------
APC_Encarsia_guadeloupae_D0449_xy                   ---  -----  ---  ---  -  -----  -  -----------  -  --------  -------------  --  ---------------  -------  -----------  ------  ---  ------  --------------------  ------  ----  ----  ---------------  -----  ----------------  ---------  ----------  ----  ----------  ---- -----    --------------  -------------  ------  --------------  ------------------  -----  -----------  ---------  ------  --------  ---  -----------------  ----------------------  -------  --------------------  --- --------  ----  -----------  ---    -    ------  ----------  ------  -  ----  ----  ----  ---  --------  -----  -------------  ---  ----------  -  ---------
APC_Encarsia_haitiensis_D0450_xy                    ---  -----  ---  ---  -  -----  -  -----------  -  --------  -------------  --  ---------------  -------  -----------  ------  ---  ------  --------------------  ------  ----  ----  ---------------  -----  ----------------  ---------  ----------  ----  ----------  ---- -----    --------------  -------------  ------  --------------  ------------------  -----  -----------  ---------  ------  --------  ---  -----------------  ----------------------  -------  --------------------  --- --------  ----  -----------  ---    -    ------  ----------  ------  -  ----  ----  ----  ---  --------  -----  -------------  ---  ----------  -  ---------
APC_Encarsia_hispida_D0153_uxy                      ---  -----  ---  ---  -  -----  -  -----------  -  --------  -------------  --  ---------------  -------  -----------  ------  ---  ------  --------------------  ------  ----  ----  ---------------  -----  ----------------  ---------  ----------  ----  ----------  ---- -----    --------------  -------------  ------  --------------  ------------------  -----  -----------  ---------  ------  --------  ---  -----------------  ----------------------  -------  --------------------  --- --------  ----  -----------  ---    -    ------  ----------  ------  -  ----  ----  ----  ---  --------  -----  -------------  ---  ----------  -  ---------
APC_Encarsia_inaron_D0465_xy                        ---  -----  ---  ---  -  -----  -  -----------  -  --------  -------------  --  ---------------  -------  -----------  ------  ---  ------  --------------------  ------  ----  ----  ---------------  -----  ----------------  ---------  ----------  ----  ----------  ---- -----    --------------  -------------  ------  --------------  ------------------  -----  -----------  ---------  ------  --------  ---  -----------------  ----------------------  -------  --------------------  --- --------  ----  -----------  ---    -    ------  ----------  ------  -  ----  ----  ----  ---  --------  -----  -------------  ---  ----------  -  ---------
APC_Encarsia_lutea_D0235_xy                         ---  -----  ---  ---  -  -----  -  -----------  -  --------  -------------  --  ---------------  -------  -----------  ------  ---  ------  --------------------  ------  ----  ----  ---------------  -----  ----------------  ---------  ----------  ----  ----------  ---- -----    --------------  -------------  ------  --------------  ------------------  -----  -----------  ---------  ------  --------  ---  -----------------  ----------------------  -------  --------------------  --- --------  ----  -----------  ---    -    ------  ----------  ------  -  ----  ----  ----  ---  --------  -----  -------------  ---  ----------  -  ---------
APC_Encarsia_luteola_D0243_xy                       ---  -----  ---  ---  -  -----  -  -----------  -  --------  -------------  --  ---------------  -------  -----------  ------  ---  ------  --------------------  ------  ----  ----  ---------------  -----  ----------------  ---------  ----------  ----  ----------  ---- -----    --------------  -------------  ------  --------------  ------------------  -----  -----------  ---------  ------  --------  ---  -----------------  ----------------------  -------  --------------------  --- --------  ----  -----------  ---    -    ------  ----------  ------  -  ----  ----  ----  ---  --------  -----  -------------  ---  ----------  -  ---------
APC_Encarsia_meritoria_D0242_xy                     ---  -----  ---  ---  -  -----  -  -----------  -  --------  -------------  --  ---------------  -------  -----------  ------  ---  ------  --------------------  ------  ----  ----  ---------------  -----  ----------------  ---------  ----------  ----  ----------  ---- -----    --------------  -------------  ------  --------------  ------------------  -----  -----------  ---------  ------  --------  ---  -----------------  ----------------------  -------  --------------------  --- --------  ----  -----------  ---    -    ------  ----------  ------  -  ----  ----  ----  ---  --------  -----  -------------  ---  ----------  -  ---------
APC_Encarsia_nigricephala_D0471_xy                  ---  -----  ---  ---  -  -----  -  -----------  -  --------  -------------  --  ---------------  -------  -----------  ------  ---  ------  --------------------  ------  ----  ----  ---------------  -----  ----------------  ---------  ----------  ----  ----------  ---- -----    --------------  -------------  ------  --------------  ------------------  -----  -----------  ---------  ------  --------  ---  -----------------  ----------------------  -------  --------------------  --- --------  ----  -----------  ---    -    ------  ----------  ------  -  ----  ----  ----  ---  --------  -----  -------------  ---  ----------  -  ---------
APC_Encarsia_noyesi_D0133_xy                        ---  -----  ---  ---  -  -----  -  -----------  -  --------  -------------  --  ---------------  -------  -----------  ------  ---  ------  --------------------  ------  ----  ----  ---------------  -----  ----------------  ---------  ----------  ----  ----------  ---- -----    --------------  -------------  ------  --------------  ------------------  -----  -----------  ---------  ------  --------  ---  -----------------  ----------------------  -------  --------------------  --- --------  ----  -----------  ---    -    ------  ----------  ------  -  ----  ----  ----  ---  --------  -----  -------------  ---  ----------  -  ---------
APC_Encarsia_nr_azimi_D0463_xy                      ---  -----  ---  ---  -  -----  -  -----------  -  --------  -------------  --  ---------------  -------  -----------  ------  ---  ------  --------------------  ------  ----  ----  ---------------  -----  ----------------  ---------  ----------  ----  ----------  ---- -----    --------------  -------------  ------  --------------  ------------------  -----  -----------  ---------  ------  --------  ---  -----------------  ----------------------  -------  --------------------  --- --------  ----  -----------  ---    -    ------  ----------  ------  -  ----  ----  ----  ---  --------  -----  -------------  ---  ----------  -  ---------
APC_Encarsia_nr_citri_D0456_xy                      ---  -----  ---  ---  -  -----  -  -----------  -  --------  -------------  --  ---------------  -------  -----------  ------  ---  ------  --------------------  ------  ----  ----  ---------------  -----  ----------------  ---------  ----------  ----  ----------  ---- -----    --------------  -------------  ------  --------------  ------------------  -----  -----------  ---------  ------  --------  ---  -----------------  ----------------------  -------  --------------------  --- --------  ----  -----------  ---    -    ------  ----------  ------  -  ----  ----  ----  ---  --------  -----  -------------  ---  ----------  -  ---------
APC_Encarsia_nr_inaron_D0589_vxy                    ---  -----  ---  ---  -  -----  -  -----------  -  --------  -------------  --  ---------------  -------  -----------  ------  ---  ------  --------------------  ------  ----  ----  ---------------  -----  ----------------  ---------  ----------  ----  ----------  ---- -----    --------------  -------------  ------  --------------  ------------------  -----  -----------  ---------  ------  --------  ---  -----------------  ----------------------  -------  --------------------  --- --------  ----  -----------  ---    -    ------  ----------  ------  -  ----  ----  ----  ---  --------  -----  -------------  ---  ----------  -  ---------
APC_Encarsia_nr_perniciosi_D0132_xy                 ---  -----  ---  ---  -  -----  -  -----------  -  --------  -------------  --  ---------------  -------  -----------  ------  ---  ------  --------------------  ------  ----  ----  ---------------  -----  ----------------  ---------  ----------  ----  ----------  ---- -----    --------------  -------------  ------  --------------  ------------------  -----  -----------  ---------  ------  --------  ---  -----------------  ----------------------  -------  --------------------  --- --------  ----  -----------  ---    -    ------  ----------  ------  -  ----  ----  ----  ---  --------  -----  -------------  ---  ----------  -  ---------
APC_Encarsia_nr_strenua_D0974_vxyz                  ---  -----  ---  ---  -  -----  -  -----------  -  --------  -------------  --  ---------------  -------  -----------  ------  ---  ------  --------------------  ------  ----  ----  ---------------  -----  ----------------  ---------  ----------  ----  ----------  ---- -----    --------------  -------------  ------  --------------  ------------------  -----  -----------  ---------  ------  --------  ---  -----------------  ----------------------  -------  --------------------  --- --------  ----  -----------  ---    -    ------  ----------  ------  -  ----  ----  ----  ---  --------  -----  -------------  ---  ----------  -  ---------
APC_Encarsia_oakeyensis_D0459_xy                    ---  -----  ---  ---  -  -----  -  -----------  -  --------  -------------  --  ---------------  -------  -----------  ------  ---  ------  --------------------  ------  ----  ----  ---------------  -----  ----------------  ---------  ----------  ----  ----------  ---- -----    --------------  -------------  ------  --------------  ------------------  -----  -----------  ---------  ------  --------  ---  -----------------  ----------------------  -------  --------------------  --- --------  ----  -----------  ---    -    ------  ----------  ------  -  ----  ----  ----  ---  --------  -----  -------------  ---  ----------  -  ---------
APC_Encarsia_pergandiella_a_D0145_xy                ---  -----  ---  ---  -  -----  -  -----------  -  --------  -------------  --  ---------------  -------  -----------  ------  ---  ------  --------------------  ------  ----  ----  ---------------  -----  ----------------  ---------  ----------  ----  ----------  ---- -----    --------------  -------------  ------  --------------  ------------------  -----  -----------  ---------  ------  --------  ---  -----------------  ----------------------  -------  --------------------  --- --------  ----  -----------  ---    -    ------  ----------  ------  -  ----  ----  ----  ---  --------  -----  -------------  ---  ----------  -  ---------
APC_Encarsia_pergandiella_b_D0221_uxy               ---  -----  ---  ---  -  -----  -  -----------  -  --------  -------------  --  ---------------  -------  -----------  ------  ---  ------  --------------------  ------  ----  ----  ---------------  -----  ----------------  ---------  ----------  ----  ----------  ---- -----    --------------  -------------  ------  --------------  ------------------  -----  -----------  ---------  ------  --------  ---  -----------------  ----------------------  -------  --------------------  --- --------  ----  -----------  ---    -    ------  ----------  ------  -  ----  ----  ----  ---  --------  -----  -------------  ---  ----------  -  ---------
APC_Encarsia_perplexa_D0296_xy                      ---  -----  ---  ---  -  -----  -  -----------  -  --------  -------------  --  ---------------  -------  -----------  ------  ---  ------  --------------------  ------  ----  ----  ---------------  -----  ----------------  ---------  ----------  ----  ----------  ---- -----    --------------  -------------  ------  --------------  ------------------  -----  -----------  ---------  ------  --------  ---  -----------------  ----------------------  -------  --------------------  --- --------  ----  -----------  ---    -    ------  ----------  ------  -  ----  ----  ----  ---  --------  -----  -------------  ---  ----------  -  ---------
APC_Encarsia_protransvena_D0136_xy                  ---  -----  ---  ---  -  -----  -  -----------  -  --------  -------------  --  ---------------  -------  -----------  ------  ---  ------  --------------------  ------  ----  ----  ---------------  -----  ----------------  ---------  ----------  ----  ----------  ---- -----    --------------  -------------  ------  --------------  ------------------  -----  -----------  ---------  ------  --------  ---  -----------------  ----------------------  -------  --------------------  --- --------  ----  -----------  ---    -    ------  ----------  ------  -  ----  ----  ----  ---  --------  -----  -------------  ---  ----------  -  ---------
APC_Encarsia_quercicola_D0140_tvxyz                 TAC  CTGGT  TGA  TCC  T  GCCAG  T  AGTCATATGCT  T  GTCTCAAA  GATTAAGCCATGC  AT  GTCTCAGTGCATGCC  GCATTAA  GGTGAAACCGC  GAATGG  CTC  ATTAAA  TCAGTTATGGTTCCTTAGAT  CGTACC  CACA  TTTA  CTTGGATAACTGTGG  TAATT  CTAGAGCTAATACATG  CAAACTAGA  GTCCCGACCA  GAGA  TGGAAGGGAC  GCTT TTATT    AGATCAAAACCAAT  CGGTGG-CGGAC-  t---tt  -GTTCGT-CCATCG  TTTACCTTGGTGACTCTG  AATAA  CTTTGTGCTGA  TCGCATGGT  CTC-GC  ACCGGCGA  CGC  ATCTTTCAAATGTCTGC  CTTATCAACTGTCGATGGTAGG  TTCTGCG  CCTACCATGGTTGTAACGGG  TAA CGGGGAAT  CAGG  GTTCGATTCCG  GAG    A    GGGAGC  CTGAGAAACG  GCTACC  A  CATC  CAAG  GAAG  GCA  GCAGGCGC  GCAAA  TTACCCACTCCCG  GCA  CGGGGAGGTA  G  TGACGAAAA
APC_Encarsia_smithi_D0299_uxy                       ---  -----  ---  ---  -  -----  -  -----------  -  --------  -------------  --  ---------------  -------  -----------  ------  ---  ------  --------------------  ------  ----  ----  ---------------  -----  ----------------  ---------  ----------  ----  ----------  ---- -----    --------------  -------------  ------  --------------  ------------------  -----  -----------  ---------  ------  --------  ---  -----------------  ----------------------  -------  --------------------  --- --------  ----  -----------  ---    -    ------  ----------  ------  -  ----  ----  ----  ---  --------  -----  -------------  ---  ----------  -  ---------
APC_Encarsia_sophia_D0218_xy                        ---  -----  ---  ---  -  -----  -  -----------  -  --------  -------------  --  ---------------  -------  -----------  ------  ---  ------  --------------------  ------  ----  ----  ---------------  -----  ----------------  ---------  ----------  ----  ----------  ---- -----    --------------  -------------  ------  --------------  ------------------  -----  -----------  ---------  ------  --------  ---  -----------------  ----------------------  -------  --------------------  --- --------  ----  -----------  ---    -    ------  ----------  ------  -  ----  ----  ----  ---  --------  -----  -------------  ---  ----------  -  ---------
APC_Pteroptrix_sp1_D2704_tuvxyz                     TAC  CTGGT  TGA  TCC  T  GCCAG  T  AGTCATATGCT  T  GTCTCAAA  GATTAAGCCATGC  AT  GTCTCAGTCCATGCC  GTATTAA  GGTGAAACCGC  GAATGG  CTC  ATTAAA  TCAGTTATGGTTCCTTAGAT  CGTACC  CAC-  TTTA  CTTGGATAACTGTGG  TAATT  CTAGAGCTAATACATG  CAAACCAGA  GTTCCGACCA  GAGA  TGGGAGGAAC  GCTT TTATT    AGATCAAAACCAAT  CGGTGG-CGGGC-  t---tt  -GCTCGT-CCACCG  TTTACCTTGGTGACTCTG  AATAA  CTTTGTGCTGA  TCGCATGGT  CTC-GC  ACCGGCGA  CGC  ATCTTTCAAATGTCTGC  CTTATCAACTGTCGATGGTAGG  TTCCGCG  CCTACCATGGTTGTAACGGG  TAA CGGGGAAT  CAGG  GTTCGATTCCG  GAG    A    GGGAGC  CTGAGAAACG  GCTACC  A  CATC  CAAG  GAAG  GCA  GCAGGCGC  GCAAA  TTACCCACTCCCG  GCA  CGGGGAGGTA  G  TGACGAAAA
APC_Pteroptrix_sp2_D2750_xyz                        ---  -----  ---  ---  -  -----  -  -----------  -  --------  -------------  --  ---------------  -------  -----------  ------  ---  ------  --------------------  ------  ----  ----  ---------------  -----  ----------------  ---------  ----------  ----  ----------  ---- -----    --------------  -------------  ------  --------------  ------------------  -----  -----------  ---------  ------  --------  ---  -----------------  ----------------------  -------  --------------------  --- --------  ----  -----------  ---    -    ------  ----------  ------  -  ----  ----  ----  ---  --------  -----  -------------  ---  ----------  -  ---------
APC_Pteroptrix_sp3_D2819_tuvxyz                     TAC  CTGGT  TGA  TCC  T  GCCAG  T  AGTCATATGCT  T  GTCTCAAA  GATTAAGCCATGC  AT  GTCTCAGTGCATGCC  GCATTAA  GGTGAAACCGC  GAATGG  CTC  ATTAAA  TCAGTTATGGTTCCTTAGAT  CGTACC  CACA  TTTA  CTTGGATAACTGTGG  TAATT  CTAGAGCTAATACATG  CAAACCAGA  GTTCCGACCA  GAGA  TGGAAGGAGC  GCTT TTATT    AGATCAAAACCAAT  CGGTGG-CGGGT-  ctc-gt  -GCTCGT-CCACCG  TTTACCTTGGTGACTCTG  AATAA  CTTTGTGCTGA  TCGCATGGT  CTC-GC  ACCGGCGA  CGC  ATCTTTCAAATGTCTGC  CTTATCAACTGTCGATGGTAGG  TTCTGCG  CCTACCATGGTTGTAACGGG  TAA CGGGGAAT  CAGG  GTTCGATTCCG  GAG    A    GGGAGC  CTGAGAAACG  GCTACC  A  CATC  CAAG  GAAG  GCA  GCAGGCGC  GCAAA  TTACCCACTCCCG  GCA  CGGGGAGGTA  G  TGACGAAAA
APR_Euryischia_sp_D0650_uxy                         ---  -----  ---  ---  -  -----  -  -----------  -  --------  -------------  --  ---------------  -------  -----------  ------  ---  ------  --------------------  ------  ----  ----  ---------------  -----  ----------------  ---------  ----------  ----  ----------  ---- -----    --------------  -------------  ------  --------------  ------------------  -----  -----------  ---------  ------  --------  ---  -----------------  ----------------------  -------  --------------------  --- --------  ----  -----------  ---    -    ------  ----------  ------  -  ----  ----  ----  ---  --------  -----  -------------  ---  ----------  -  ---------
APR_Euryischomyia_sp_D1806_tuvxyz                   TAC  CTGGT  TGA  TCC  T  GCCAG  T  AGTCATATGCT  T  GTCTCAAA  GATTAAGCCATGC  AT  GTCTCAGTGCACGCC  GAATTAA  GGTGAAACCGC  GAATGG  CTC  ATTAAA  TCAGTTATGGTTCCTTAGAT  TGTACC  CACA  TTTA  CTTGGATAACTGTGG  TAATT  CTAGAGCTAATACATG  CAAACCAGA  GTTCCGACCA  GAGA  TGGAAGGAAC  GCTT TTATT    AGATCAAAACCAAT  CGGTGG-CGGGCC  t---tt  GGTTCGT-CCACCG  TTTACCTTGGTGACTCTG  AATAA  CTTTGTGCTGA  TCGCACGGT  CTC-GC  ACCGGCGA  CAA  ATCTTTCAAATGTCTGC  CTTATCAACTGTCGATGGTAGG  TTCTGCG  CCTACCATGGTTGTAACGGG  TAA CGGGGAAT  CAGG  GTTCGATTCCG  GAG    A    GGGAGC  CTGAGAAACG  GCTACC  A  CATC  CAAG  GAAG  GCA  GCAGGCGC  GCAAA  TTACCCACTCCCG  GCA  CGGGGAGGTA  G  TGACGAAAA
API_Aphelininae_ng1_D2749_xyz                       ---  -----  ---  ---  -  -----  -  -----------  -  --------  -------------  --  ---------------  -------  -----------  ------  ---  ------  --------------------  ------  ----  ----  ---------------  -----  ----------------  ---------  ----------  ----  ----------  ---- -----    --------------  -------------  ------  --------------  ------------------  -----  -----------  ---------  ------  --------  ---  -----------------  ----------------------  -------  --------------------  --- --------  ----  -----------  ---    -    ------  ----------  ------  -  ----  ----  ----  ---  --------  -----  -------------  ---  ----------  -  ---------
API_Aphelininae_ng2_D1354_uxyz                      ---  -----  ---  ---  -  -----  -  -----------  -  --------  -------------  --  ---------------  -------  -----------  ------  ---  ------  --------------------  ------  ----  ----  ---------------  -----  ----------------  ---------  ----------  ----  ----------  ---- -----    --------------  -------------  ------  --------------  ------------------  -----  -----------  ---------  ------  --------  ---  -----------------  ----------------------  -------  --------------------  --- --------  ----  -----------  ---    -    ------  ----------  ------  -  ----  ----  ----  ---  --------  -----  -------------  ---  ----------  -  ---------
API_Aphelininae_ng3_D2751_xyz                       ---  -----  ---  ---  -  -----  -  -----------  -  --------  -------------  --  ---------------  -------  -----------  ------  ---  ------  --------------------  ------  ----  ----  ---------------  -----  ----------------  ---------  ----------  ----  ----------  ---- -----    --------------  -------------  ------  --------------  ------------------  -----  -----------  ---------  ------  --------  ---  -----------------  ----------------------  -------  --------------------  --- --------  ----  -----------  ---    -    ------  ----------  ------  -  ----  ----  ----  ---  --------  -----  -------------  ---  ----------  -  ---------
API_Aphelininae_ng4_D2752_xyz                       ---  -----  ---  ---  -  -----  -  -----------  -  --------  -------------  --  ---------------  -------  -----------  ------  ---  ------  --------------------  ------  ----  ----  ---------------  -----  ----------------  ---------  ----------  ----  ----------  ---- -----    --------------  -------------  ------  --------------  ------------------  -----  -----------  ---------  ------  --------  ---  -----------------  ----------------------  -------  --------------------  --- --------  ----  -----------  ---    -    ------  ----------  ------  -  ----  ----  ----  ---  --------  -----  -------------  ---  ----------  -  ---------
APZ_Ablerus_clisiocampae_D0401_xy                   ---  -----  ---  ---  -  -----  -  -----------  -  --------  -------------  --  ---------------  -------  -----------  ------  ---  ------  --------------------  ------  ----  ----  ---------------  -----  ----------------  ---------  ----------  ----  ----------  ---- -----    --------------  -------------  ------  --------------  ------------------  -----  -----------  ---------  ------  --------  ---  -----------------  ----------------------  -------  --------------------  --- --------  ----  -----------  ---    -    ------  ----------  ------  -  ----  ----  ----  ---  --------  -----  -------------  ---  ----------  -  ---------
APZ_Ablerus_sp1_D0404_tuvxyz                        TAC  CTGGT  TGA  TCC  T  GCCAG  T  AGTCATATGCT  T  GTCTCAAA  GATTAAGCCATGC  AT  GTCTCAGTGCATGCC  GAATTAA  GGTGAAACCGC  GAATGG  CTC  ATTAAA  TCAGTTATGGTTCCTTAGAT  CGTACC  CACA  TTTA  CTTGGATAACTGTGG  TAATT  CTAGAGCTAATACATG  CAAACCAGA  GTTCCGACCA  GAGA  TGGAAGGAAC  GCTT TTATT    AGATCAAAACCAAT  CGGTGG-CGGGC-  t---ca  -GTCCGT-CCACCG  TTTACCTTGGTGACTCTG  AATAA  CTTTGTGCTGA  TCGCACGGT  CTC-GC  ACCGGCGA  CGC  ATCTTTCAAATGTCTGC  CTTATCAACTGTCGATGGTAGG  TTCTGCG  CCTACCATGGTTGTAACGGG  TAA CGGGGAAT  CAGG  GTTCGATTCCG  GAG    A    GGGAGC  CTGAGAAACG  GCTACC  A  CATC  CAAG  GAAG  GCA  GCAGGCGC  GCAAA  TTACCCACTCCCG  GCA  CGGGGAGGTA  G  TGACGAAAA
APZ_Ablerus_sp10_D0827_vxyz                         ---  -----  ---  ---  -  -----  -  -----------  -  --------  -------------  --  ---------------  -------  -----------  ------  ---  ------  --------------------  ------  ----  ----  ---------------  -----  ----------------  ---------  ----------  ----  ----------  ---- -----    --------------  -------------  ------  --------------  ------------------  -----  -----------  ---------  ------  --------  ---  -----------------  ----------------------  -------  --------------------  --- --------  ----  -----------  ---    -    ------  ----------  ------  -  ----  ----  ----  ---  --------  -----  -------------  ---  ----------  -  ---------
APZ_Ablerus_sp11_D1061_uvxy                         ---  -----  ---  ---  -  -----  -  -----------  -  --------  -------------  --  ---------------  -------  -----------  ------  ---  ------  --------------------  ------  ----  ----  ---------------  -----  ----------------  ---------  ----------  ----  ----------  ---- -----    --------------  -------------  ------  --------------  ------------------  -----  -----------  ---------  ------  --------  ---  -----------------  ----------------------  -------  --------------------  --- --------  ----  -----------  ---    -    ------  ----------  ------  -  ----  ----  ----  ---  --------  -----  -------------  ---  ----------  -  ---------
APZ_Ablerus_sp2_D0833_vxyz                          ---  -----  ---  ---  -  -----  -  -----------  -  --------  -------------  --  ---------------  -------  -----------  ------  ---  ------  --------------------  ------  ----  ----  ---------------  -----  ----------------  ---------  ----------  ----  ----------  ---- -----    --------------  -------------  ------  --------------  ------------------  -----  -----------  ---------  ------  --------  ---  -----------------  ----------------------  -------  --------------------  --- --------  ----  -----------  ---    -    ------  ----------  ------  -  ----  ----  ----  ---  --------  -----  -------------  ---  ----------  -  ---------
APZ_Ablerus_sp3_D0834_vxyz                          ---  -----  ---  ---  -  -----  -  -----------  -  --------  -------------  --  ---------------  -------  -----------  ------  ---  ------  --------------------  ------  ----  ----  ---------------  -----  ----------------  ---------  ----------  ----  ----------  ---- -----    --------------  -------------  ------  --------------  ------------------  -----  -----------  ---------  ------  --------  ---  -----------------  ----------------------  -------  --------------------  --- --------  ----  -----------  ---    -    ------  ----------  ------  -  ----  ----  ----  ---  --------  -----  -------------  ---  ----------  -  ---------
APZ_Ablerus_sp4_D0838_vxy                           ---  -----  ---  ---  -  -----  -  -----------  -  --------  -------------  --  ---------------  -------  -----------  ------  ---  ------  --------------------  ------  ----  ----  ---------------  -----  ----------------  ---------  ----------  ----  ----------  ---- -----    --------------  -------------  ------  --------------  ------------------  -----  -----------  ---------  ------  --------  ---  -----------------  ----------------------  -------  --------------------  --- --------  ----  -----------  ---    -    ------  ----------  ------  -  ----  ----  ----  ---  --------  -----  -------------  ---  ----------  -  ---------
APZ_Ablerus_sp5_D0841_xy                            ---  -----  ---  ---  -  -----  -  -----------  -  --------  -------------  --  ---------------  -------  -----------  ------  ---  ------  --------------------  ------  ----  ----  ---------------  -----  ----------------  ---------  ----------  ----  ----------  ---- -----    --------------  -------------  ------  --------------  ------------------  -----  -----------  ---------  ------  --------  ---  -----------------  ----------------------  -------  --------------------  --- --------  ----  -----------  ---    -    ------  ----------  ------  -  ----  ----  ----  ---  --------  -----  -------------  ---  ----------  -  ---------
APZ_Ablerus_sp6_D1022_uvxyz                         ---  -----  ---  ---  -  -----  -  -----------  -  --------  -------------  --  ---------------  -------  -----------  ------  ---  ------  --------------------  ------  ----  ----  ---------------  -----  ----------------  ---------  ----------  ----  ----------  ---- -----    --------------  -------------  ------  --------------  ------------------  -----  -----------  ---------  ------  --------  ---  -----------------  ----------------------  -------  --------------------  --- --------  ----  -----------  ---    -    ------  ----------  ------  -  ----  ----  ----  ---  --------  -----  -------------  ---  ----------  -  ---------
APZ_Ablerus_sp7_D0507_uvxyz                         ---  -----  ---  ---  -  -----  -  -----------  -  --------  -------------  --  ---------------  -------  -----------  ------  ---  ------  --------------------  ------  ----  ----  ---------------  -----  ----------------  ---------  ----------  ----  ----------  ---- -----    --------------  -------------  ------  --------------  ------------------  -----  -----------  ---------  ------  --------  ---  -----------------  ----------------------  -------  --------------------  --- --------  ----  -----------  ---    -    ------  ----------  ------  -  ----  ----  ----  ---  --------  -----  -------------  ---  ----------  -  ---------
APZ_Ablerus_sp8_D0403_uvxyz                         ---  -----  ---  ---  -  -----  -  -----------  -  --------  -------------  --  ---------------  -------  -----------  ------  ---  ------  --------------------  ------  ----  ----  ---------------  -----  ----------------  ---------  ----------  ----  ----------  ---- -----    --------------  -------------  ------  --------------  ------------------  -----  -----------  ---------  ------  --------  ---  -----------------  ----------------------  -------  --------------------  --- --------  ----  -----------  ---    -    ------  ----------  ------  -  ----  ----  ----  ---  --------  -----  -------------  ---  ----------  -  ---------
APZ_Ablerus_sp9_D0816_uvxyz                         ---  -----  ---  ---  -  -----  -  -----------  -  --------  -------------  --  ---------------  -------  -----------  ------  ---  ------  --------------------  ------  ----  ----  ---------------  -----  ----------------  ---------  ----------  ----  ----------  ---- -----    --------------  -------------  ------  --------------  ------------------  -----  -----------  ---------  ------  --------  ---  -----------------  ----------------------  -------  --------------------  --- --------  ----  -----------  ---    -    ------  ----------  ------  -  ----  ----  ----  ---  --------  -----  -------------  ---  ----------  -  ---------
CAL_Cales_berryi_D1428_tuvxyz                       TAC  CTGGT  TGA  TCC  T  GCCAG  T  AGTCATATGCT  T  GTCTCAAA  GATTAAGCCATGC  AT  GTCTCAGTGCATGCC  AAATTAA  GGTGAAACCGC  GAATGG  CTC  ATTAAA  TCAGTTATGGTTCCTTAGAT  CGTACC  CACA  TTTA  CTTGGATAACTGTGG  TAATT  CTAGAGCTAATACATG  CAAACCAGA  GTTCCGACCA  GAGA  TGGAAGGAAC  GCTT TTATT    AGATCAAAACCAAT  CGGTGG-CGG---  ctc-gt  ---TCGT-CCACCG  TTTATTATGGTGACTCTG  AATAA  CTTTGTGCTGA  TCGCATGGT  CTC-GC  ACCGGCGA  CGC  ATCTTTCAAATGTCTGC  CTTATCAACTGTCGATGGTAGG  TTCTGCG  CCTACCATGGTTGTAACGGG  TAA CGGGGAAT  CAGG  GTTCGATTCCG  GAG    A    GGGAGC  CTGAGAAACG  GCTACC  A  CATC  CAAG  GAAG  GCA  GCAGGCGC  GCAAA  TTACCCACTCCCG  GCA  CGGGGAGGTA  G  TGACGAAAA
CAL_Cales_noacki_D1290_uvxy                         ---  -----  ---  ---  -  -----  -  -----------  -  --------  -------------  --  ---------------  -------  -----------  ------  ---  ------  --------------------  ------  ----  ----  ---------------  -----  ----------------  ---------  ----------  ----  ----------  ---- -----    --------------  -------------  ------  --------------  ------------------  -----  -----------  ---------  ------  --------  ---  -----------------  ----------------------  -------  --------------------  --- --------  ----  -----------  ---    -    ------  ----------  ------  -  ----  ----  ----  ---  --------  -----  -------------  ---  ----------  -  ---------
CAL_Cales_noacki_D1519_tuvxyz                       TAC  CTGGT  TGA  TCC  T  GCCAG  T  AGTCATATGCT  T  GTCTCAAA  GATTAAGCCATGC  AT  GTCTCAGTGCATGCC  GAATTAA  GGTGAAACCGC  GAATGG  CTC  ATTAAA  TCAGTTATGGTTCCTTAGAT  CGTACC  CACA  TTTA  CTTGGATAACTGTGG  TAATT  CTAGAGCTAATACATG  CAAACCAGA  GTTCCAACCA  GAGA  TGGAAGGAAC  GCTT TTATT    AGATCAAAACCAAT  CGGTGG-CGGA--  ct--tg  --TCCGT-CCACCG  TTTACTATGGTGACTCTG  AATAA  CTTTGTGCTGA  TCGCATGGT  CTC-GT  ACCGGCGA  CGC  ATCTTTCAAATGTCTGC  CTTATCAACTGTCGATGGTAGG  TTCTGCG  CCTACCATGGTTGTAACGGG  TAA CGGGGAAT  CAGG  GTTCGATTCCG  GAG    A    GGGAGC  CTGAGAAACG  GCTACC  A  CATC  CAAG  GAAG  GCA  GCAGGCGC  GCAAA  TTACCCACTCCCG  GCA  CGGGGAGGTA  G  TGACGAAAA
CAL_Cales_sp_D0604_tuvxy                            TAC  CTGGT  TGA  TCC  T  GCCAG  T  AGTCATATGCT  T  GTCTCAAA  GATTAAGCCATGC  AT  GTCTCAGTGCATGCC  GAATTAA  GGTGAAACCGC  GAATGG  CTC  ATTAAA  TCAGTTATGGTTCCTTAGAT  CGTACC  CACA  TTTA  CTTGGATAACTGTGG  TAATT  CTAGAGCTAATACATG  CAAACCAGA  GTTCCAACCA  GAGA  TGGAAGGAAC  GCTT TTATT    AGATCAAAACCAAT  CGGTGG-CGGA--  ct--tg  --TCCGT-CCACCG  TTTACTATGGTGACTCTG  AATAA  CTTTGTGCTGA  TCGCATGGT  CTC-GT  ACCGGCGA  CGC  ATCTTTCAAATGTCTGC  CTTATCAACTGTCGATGGTAGG  TTCTGCG  CCTACCATGGTTGTAACGGG  TAA CGGGGAAT  CAGG  GTTCGATTCCG  GAG    A    GGGAGC  CTGAGAAACG  GCTACC  A  CATC  CAAG  GAAG  GCA  GCAGGCGC  GCAAA  TTACCCACTCCCG  GCA  CGGGGAGGTA  G  TGACGAAAA
CHCB_Brachymeria_sp1_D1802_uxyz                     ---  -----  ---  ---  -  -----  -  -----------  -  --------  -------------  --  ---------------  -------  -----------  ------  ---  ------  --------------------  ------  ----  ----  ---------------  -----  ----------------  ---------  ----------  ----  ----------  ---- -----    --------------  -------------  ------  --------------  ------------------  -----  -----------  ---------  ------  --------  ---  -----------------  ----------------------  -------  --------------------  --- --------  ----  -----------  ---    -    ------  ----------  ------  -  ----  ----  ----  ---  --------  -----  -------------  ---  ----------  -  ---------
CHCB_Brachymeria_sp2_D1831_xyz                      ---  -----  ---  ---  -  -----  -  -----------  -  --------  -------------  --  ---------------  -------  -----------  ------  ---  ------  --------------------  ------  ----  ----  ---------------  -----  ----------------  ---------  ----------  ----  ----------  ---- -----    --------------  -------------  ------  --------------  ------------------  -----  -----------  ---------  ------  --------  ---  -----------------  ----------------------  -------  --------------------  --- --------  ----  -----------  ---    -    ------  ----------  ------  -  ----  ----  ----  ---  --------  -----  -------------  ---  ----------  -  ---------
CHCB_Brachymeria_sp3_D1837_xyz                      ---  -----  ---  ---  -  -----  -  -----------  -  --------  -------------  --  ---------------  -------  -----------  ------  ---  ------  --------------------  ------  ----  ----  ---------------  -----  ----------------  ---------  ----------  ----  ----------  ---- -----    --------------  -------------  ------  --------------  ------------------  -----  -----------  ---------  ------  --------  ---  -----------------  ----------------------  -------  --------------------  --- --------  ----  -----------  ---    -    ------  ----------  ------  -  ----  ----  ----  ---  --------  -----  -------------  ---  ----------  -  ---------
CHCB_Brachymeria_sp4_D1893_tuvxyz                   TAC  CTGGT  TGA  TCC  T  GCCAG  T  AGTCATATGCT  T  GTCTCAAA  GATTAAGCCATGC  AT  GTCTCAGTGCAAGCC  GAATTAA  GGTGAAACCGC  GAATGG  CTC  ATTAAA  TCAGTTATGGTTCCTTAGAT  CGTACC  CACA  TTTA  CTTGGATAACTGTGG  TAATT  CTAGAGCTAATACATG  CAAACTAGA  GTTCCAACCA  GAGA  TGGAAGGAAT  GCTT TTATT    AGATCAAAATCAAT  CGGTGGGCGGG--  tt--cg  --CTCGT-CTACCG  TTTACATTGGTGACTCTG  AATAA  CTTTGTGCTGA  TCGCACGGT  CTA-GC  ACCGGCGA  CGC  ATCTTTCAAATGTCTGC  CTTATCAACTGTCGATGGTAGG  TTCTGCG  CCTACCATGGTTGTAACGGG  TAA CGGGGAAT  CAGG  GTTCGATTCCG  GAG    A    GGGAGC  CTGAGAAACG  GCTACC  A  CATC  CAAG  GAAG  GCA  GCAGGCGC  GCAAA  TTACCCACTCCCG  GCA  CGGGGAGGTA  G  TGACGAAAA
CHCB_Brachymeria_sp5_D1886_vxyz                     ---  -----  ---  ---  -  -----  -  -----------  -  --------  -------------  --  ---------------  -------  -----------  ------  ---  ------  --------------------  ------  ----  ----  ---------------  -----  ----------------  ---------  ----------  ----  ----------  ---- -----    --------------  -------------  ------  --------------  ------------------  -----  -----------  ---------  ------  --------  ---  -----------------  ----------------------  -------  --------------------  --- --------  ----  -----------  ---    -    ------  ----------  ------  -  ----  ----  ----  ---  --------  -----  -------------  ---  ----------  -  ---------
CHCB_Brachymeria_sp6_D2689_xyz                      ---  -----  ---  ---  -  -----  -  -----------  -  --------  -------------  --  ---------------  -------  -----------  ------  ---  ------  --------------------  ------  ----  ----  ---------------  -----  ----------------  ---------  ----------  ----  ----------  ---- -----    --------------  -------------  ------  --------------  ------------------  -----  -----------  ---------  ------  --------  ---  -----------------  ----------------------  -------  --------------------  --- --------  ----  -----------  ---    -    ------  ----------  ------  -  ----  ----  ----  ---  --------  -----  -------------  ---  ----------  -  ---------
CHCC_Chalcis_flebilis_D2272_tuvxyz                  TAC  CTGGT  TGA  TCC  T  GCCAG  T  AGTCATATGCT  T  GTCTCAAA  GATTAAGCCATGC  AT  GTCTCAGTGCAAGCC  AAATTAA  GGTGAAACCGC  GAATGG  CTC  ATTAAA  TCAGTTATGGTTCCTTAGAT  CGTACC  CACA  TTTA  CTTGGATAACTGTGG  TAATT  CTAGAGCTAATACATG  CAAACTAGA  GTTCCGACCA  GAGA  TGGAAGGAAC  GCTT TTATT    AGATCAAAACCAAT  CGGTGT-CGGG--  tt--cg  --CTCGT-GCACCG  TTTACTTTGGTGACTCTG  AATAA  CTTTGTGCTGA  TCGCACGGT  CAACGT  ACCGGCGA  CGC  ATCTTTCAAATGTCTGC  CTTATCAACTGTCGATGGTAGG  TTCTGCG  CCTACCATGGTTGTAACGGG  TAA CGGGGAAT  CAGG  GTTCGATTCCG  GAG    A    GGGAGC  CTGAGAAACG  GCTACC  A  CATC  CAAG  GAAG  GCA  GCAGGCGC  GCAAA  TTACCCACTCCCG  GCA  CGGGGAGGTA  G  TGACGAAAA
CHCC_Chalcis_sispes_D2302_Cxyz                      ---  -----  ---  ---  -  -----  -  -----------  -  --------  -------------  --  ---------------  -------  -----------  ------  ---  ------  --------------------  ------  ----  ----  ---------------  -----  ----------------  ---------  ----------  ----  ----------  ---- -----    --------------  -------------  ------  --------------  ------------------  -----  -----------  ---------  ------  --------  ---  -----------------  ----------------------  -------  --------------------  --- --------  ----  -----------  ---    -    ------  ----------  ------  -  ----  ----  ----  ---  --------  -----  -------------  ---  ----------  -  ---------
CHCC_Conura_debilis_grp_a_D1778_tuxyz               TAC  CTGGT  TGA  TCC  T  GCCAG  T  AgTcATATGCt  T  GTCTCAAA  GAtTAAGCCATGC  AT  GTcTCAgTGCAAGGC  GAATtAA  GGtGAAACCGG  GAATGG  CTC  ATTAAA  TCAGTTATGGTTCCTTAgAT  CGTACC  CACA  TTTA  CTTGGATAACTGTGG  TAATT  CTAAAGCTAATACATG  CAAACTAGA  GTTCCGACCA  GAGA  TGGAAGGAAC  GCTT TTATT    AAATCAAAACCAAT  CGGTGT-CGGG--  tt--cg  --CTCGT-TCACCG  TTTACTTTGGTGACTCTG  AATAA  CTTTGTGCTGA  TCGCACGGT  CAC-GC  ACCGGCGA  CGC  ATCTTTCAAATGTCTGC  CTTATCAACTGTCAATGGTAGG  TTTTGCG  CCTACCATGGTTGTAACGGG  TAA CGGGGAAT  CAGG  GTTCGATTCCG  GAG    A    GGGAGC  CTGAGAAACG  GCTACC  A  CATC  CAAG  GAAG  GCA  GCAGGCGC  GCAAA  TTACCCACTCCCG  GCA  CGGGGAGGTA  G  TGACAAAAA
CHCC_Conura_debilis_grp_b_D1779_uvxyz               ---  -----  ---  ---  -  -----  -  -----------  -  --------  -------------  --  ---------------  -------  -----------  ------  ---  ------  --------------------  ------  ----  ----  ---------------  -----  ----------------  ---------  ----------  ----  ----------  ---- -----    --------------  -------------  ------  --------------  ------------------  -----  -----------  ---------  ------  --------  ---  -----------------  ----------------------  -------  --------------------  --- --------  ----  -----------  ---    -    ------  ----------  ------  -  ----  ----  ----  ---  --------  -----  -------------  ---  ----------  -  ---------
CHCC_Conura_delumbis_D1470_tuvxyz                   TAC  CTGGT  TGA  TCC  T  GCCAG  T  AGTCATATGCT  T  GTCTCAAA  GATTAAGCCATGC  AT  GTCTCAGTGCAAGCC  GAATTAA  GGTGAAACCGC  GAATGG  CTC  ATTAAA  TCAGTTATGGTTCCTTAGAT  CGTACC  CACA  TTTA  CTTGGATAACTGTGG  TAATT  CTAGAGCTAATACATG  CAAACTAGA  GTTCCGACCA  GAGA  TGGAAGGAAC  GCTT TTATT    AGATCAAAACCAAT  CGGTGT-CGGG--  tt--cg  --CTCGT-TCACCG  TTTACTTTGGTGACTCTG  AATAA  CTTTGTGCTGA  TCGCACGGT  CAC-GC  ACCGGCGA  CGC  ATCTTTCAAATGTCTGC  CTTATCAACTGTCGATGGTAGG  TTCTGCG  CCTACCATGGTTGTAACGGG  TAA CGGGGAAT  CAGG  GTTCGATTCCG  GAG    A    GGGAGC  CTGAGAAACG  GCTACC  A  CATC  CAAG  GAAG  GCA  GCAGGCGC  GCAAA  TTACCCACTCCCG  GCA  CGGGGAGGTA  G  TGACGAAAA
CHCC_Conura_sp1_D2527_vxyz                          ---  -----  ---  ---  -  -----  -  -----------  -  --------  -------------  --  ---------------  -------  -----------  ------  ---  ------  --------------------  ------  ----  ----  ---------------  -----  ----------------  ---------  ----------  ----  ----------  ---- -----    --------------  -------------  ------  --------------  ------------------  -----  -----------  ---------  ------  --------  ---  -----------------  ----------------------  -------  --------------------  --- --------  ----  -----------  ---    -    ------  ----------  ------  -  ----  ----  ----  ---  --------  -----  -------------  ---  ----------  -  ---------
CHCC_Conura_sp2_D2528_xyz                           ---  -----  ---  ---  -  -----  -  -----------  -  --------  -------------  --  ---------------  -------  -----------  ------  ---  ------  --------------------  ------  ----  ----  ---------------  -----  ----------------  ---------  ----------  ----  ----------  ---- -----    --------------  -------------  ------  --------------  ------------------  -----  -----------  ---------  ------  --------  ---  -----------------  ----------------------  -------  --------------------  --- --------  ----  -----------  ---    -    ------  ----------  ------  -  ----  ----  ----  ---  --------  -----  -------------  ---  ----------  -  ---------
CHCC_Conura_sp3_D2529_xyz                           ---  -----  ---  ---  -  -----  -  -----------  -  --------  -------------  --  ---------------  -------  -----------  ------  ---  ------  --------------------  ------  ----  ----  ---------------  -----  ----------------  ---------  ----------  ----  ----------  ---- -----    --------------  -------------  ------  --------------  ------------------  -----  -----------  ---------  ------  --------  ---  -----------------  ----------------------  -------  --------------------  --- --------  ----  -----------  ---    -    ------  ----------  ------  -  ----  ----  ----  ---  --------  -----  -------------  ---  ----------  -  ---------
CHCC_Conura_sp4_D2530_vxyz                          ---  -----  ---  ---  -  -----  -  -----------  -  --------  -------------  --  ---------------  -------  -----------  ------  ---  ------  --------------------  ------  ----  ----  ---------------  -----  ----------------  ---------  ----------  ----  ----------  ---- -----    --------------  -------------  ------  --------------  ------------------  -----  -----------  ---------  ------  --------  ---  -----------------  ----------------------  -------  --------------------  --- --------  ----  -----------  ---    -    ------  ----------  ------  -  ----  ----  ----  ---  --------  -----  -------------  ---  ----------  -  ---------
CHCP_Parastypiura_pulchripennis_D2285_tuvxyz        TAC  CTGGT  TGA  TCC  T  GCCAG  T  AGTCATATGCT  T  GTCTCAAA  GATTAAGCCATGC  AT  GTCTCAGTGCAAGCC  AAATTAA  GGTGAAACCGC  GAATGG  CTC  ATTAAA  TCAGTTATGGTTCCTTGGAT  CGTACC  CACA  TTTA  CTTGGATAACTGTGG  TAATT  CTAGAGCTAATACATG  CAAACCAGA  GTTCCGACCA  GAGA  TGGAAGGAAC  GCTT TTATT    AGATCAAAACCAAT  CGGTGG-CGTGC-  ttc-tc  -GCATGT-CCACCG  TTTGACTTGGTGACTCTG  AATAA  CTTTGTGCTGA  TCGCACGGT  CTC-GC  ACCGGCGA  CGC  ATCCTTCAAATGTCTGC  CTTATCAACTGTCGATGGTAGG  TTCTGCG  CCTACCATGGTTGTAACGGG  TAA CGGGGAAT  CAGG  GTTCGATTCCG  GAG    A    GGGAGC  CTGAGAAACG  GCTACC  A  CATC  CAAG  GAAG  GCA  GCAGGCGC  GCAAA  TTACCCACTCCCG  GCA  CGGGGAGGTA  G  TGACGAAAA
CHCP_Stypiura_sp_D2688_tuvxyz                       TAC  CTGGT  TGA  TCC  T  GCCAG  T  AGTCATANGCT  T  GTCTCAAA  GATTANNCCATGC  AT  GTCTCAGTGCAAGCC  AAATTAA  GGTGAAACCGC  GAATGG  CTC  ATTAAA  TCAGTTATGGTTCCTTAGAT  CGTACC  CACA  TTTA  CTTGGATAACTGTGG  TAATT  CTAGAGCTAATACATG  CAAACCAGA  GTTCCGACCA  GAGA  TGGAAGGAAC  GCTT TTATT    AGATCAAAACCAAT  CGGTGG-CGTGC-  tc--tc  -GCGCGT-CCACCG  TTTACCTTGGTGACTCTG  AATAA  CTTTGTGCTGA  TCGCACGGT  CTC-GC  ACCGGCGA  CGC  ATCTTTCAAATGTCTGC  CTTATCAACTGTCGATGGTAGG  TTCTGCG  CCTACCATGGTTGTAACGGG  TAA CGGGGAAT  CAGG  GTTCGATTCCG  GAG    A    GGGAGC  CTGAGAAACG  GCTACC  A  CATC  CAAG  GAAG  GCA  GCAGGCGC  GCAAA  TTACCCACTCCCG  GCA  CGGGGAGGTA  G  TGACGAAAA
CHCR_Acanthochalcis_nigricans_D2317_tuvxyz          TAC  CTGGT  TGA  TCC  T  GCCAG  T  AGTCATATGCT  T  GTCTCAAA  GATTAAGCCATGC  AT  GTCTCAGTGCATGCC  GAATTAA  GGTGAAACCGC  GAATGG  CTC  ATTAAA  TCAGTTATGGTTCCTTAGAT  CGTACC  CACA  TTTA  CTTGGATAACTGTGG  TAATT  CTAGAGCTAATACATG  CAAACCAGA  GTTCCGAGCA  GCAA  TGC-AGGAAC  GCTT TTATT    AGATCAAAACCAAT  CGGTGG-GGGGT-  tt--tg  -GCCCTTACCACCG  TTTACTTTGGTGACTCTG  AATAA  CTTTGTGCTGA  TCGCACGGT  CTC-GC  ACCGGCGA  CGC  ATCTTTCAAATGTCTGC  CTTATCAACTGTCGATGGTAGG  TTCTGCG  CCTACCATGGTTGTAACGGG  TAA CGGGGAAT  CAGG  GTTCGATTCCG  GAG    A    GGGAGC  CTGAGAAACG  GCTACC  A  CATC  CAAG  GAAG  GCA  GCAGGCGC  GCAAA  TTACCCACTCCCG  GCA  CGGGGAGGTA  G  TGACGAAAA
CHCR_Cratocentrus_pruinosus_D1776_uxy               ---  -----  ---  ---  -  -----  -  -----------  -  --------  -------------  --  ---------------  -------  -----------  ------  ---  ------  --------------------  ------  ----  ----  ---------------  -----  ----------------  ---------  ----------  ----  ----------  ---- -----    --------------  -------------  ------  --------------  ------------------  -----  -----------  ---------  ------  --------  ---  -----------------  ----------------------  -------  --------------------  --- --------  ----  -----------  ---    -    ------  ----------  ------  -  ----  ----  ----  ---  --------  -----  -------------  ---  ----------  -  ---------
CHCR_Trigonura_californica_D2687_tuvxyz             TAC  CTGGT  TGA  TCC  T  GCCAG  T  AGTCATATGCT  T  GTCTCAAA  GATTAAGCCATGC  AT  GTCTCAGTGCAAGCC  GAATTAA  GGTGAAACCGC  GAATGG  CTC  ATTAAA  TCAGTTATGGTTCCTTAGAT  CGTACC  CACA  TTTA  CTTGGATAACTGTGG  TAATT  CTAGAGCTAATACATG  CAAACCAGA  GTTCCGACCA  GAGA  TGGAAGGAAC  GCTT TTATT    AGATCAAAACCAAT  CGGTGG-CGGGCG  gt--ca  CGCTCGT-CCACCG  TTTACCTTGGTGACTCTG  AATAA  CTTTGTGCTGA  TCGCACGGT  CTC-GC  ACCGGCGA  CGC  ATCTTTCAAATGTCTGC  CTTATCAACTGTCGATGGTAGG  TTCTGCG  CCTACCATGGTTGTAACGGG  TAA CGGGGAAT  CAGG  GTTCGATTCCG  GAG    A    GGGAGC  CTGAGAAACG  GCTACC  A  CATC  CAAG  GAAG  GCA  GCAGGCGC  GCAAA  TTACCCACTCCCG  GCA  CGGGGAGGTA  G  TGACGAAAA
CHD_Dirhinus_sp1_D1526_uxy                          ---  -----  ---  ---  -  -----  -  -----------  -  --------  -------------  --  ---------------  -------  -----------  ------  ---  ------  --------------------  ------  ----  ----  ---------------  -----  ----------------  ---------  ----------  ----  ----------  ---- -----    --------------  -------------  ------  --------------  ------------------  -----  -----------  ---------  ------  --------  ---  -----------------  ----------------------  -------  --------------------  --- --------  ----  -----------  ---    -    ------  ----------  ------  -  ----  ----  ----  ---  --------  -----  -------------  ---  ----------  -  ---------
CHD_Dirhinus_sp2_D1775_uvxyz                        ---  -----  ---  ---  -  -----  -  -----------  -  --------  -------------  --  ---------------  -------  -----------  ------  ---  ------  --------------------  ------  ----  ----  ---------------  -----  ----------------  ---------  ----------  ----  ----------  ---- -----    --------------  -------------  ------  --------------  ------------------  -----  -----------  ---------  ------  --------  ---  -----------------  ----------------------  -------  --------------------  --- --------  ----  -----------  ---    -    ------  ----------  ------  -  ----  ----  ----  ---  --------  -----  -------------  ---  ----------  -  ---------
CHD_Dirhinus_sp3_D1827_uvxyz                        ---  -----  ---  ---  -  -----  -  -----------  -  --------  -------------  --  ---------------  -------  -----------  ------  ---  ------  --------------------  ------  ----  ----  ---------------  -----  ----------------  ---------  ----------  ----  ----------  ---- -----    --------------  -------------  ------  --------------  ------------------  -----  -----------  ---------  ------  --------  ---  -----------------  ----------------------  -------  --------------------  --- --------  ----  -----------  ---    -    ------  ----------  ------  -  ----  ----  ----  ---  --------  -----  -------------  ---  ----------  -  ---------
CHD_Dirhinus_sp4_D2523_uvxyz                        ---  -----  ---  ---  -  -----  -  -----------  -  --------  -------------  --  ---------------  -------  -----------  ------  ---  ------  --------------------  ------  ----  ----  ---------------  -----  ----------------  ---------  ----------  ----  ----------  ---- -----    --------------  -------------  ------  --------------  ------------------  -----  -----------  ---------  ------  --------  ---  -----------------  ----------------------  -------  --------------------  --- --------  ----  -----------  ---    -    ------  ----------  ------  -  ----  ----  ----  ---  --------  -----  -------------  ---  ----------  -  ---------
CHD_Dirhinus_sp5_D2690_tvxyz                        TAC  CTGGT  TGA  TCC  T  GCCAG  T  AGTCATATGCT  T  GTCTCAAA  GATTAAGCCATGC  AT  GTCTCAGTGCAAGCC  GAATTAA  GGTGAAACCGC  GAATGG  CTC  ATTAAA  TCAGTTATGGTTCCTTAGAT  CGTACC  TACA  TTTA  CTTGGATAACTGTGG  TAATT  CTAGAGCTAATACATG  CAAACCAGA  GTTCCGACCA  GAGA  TGGAAGGAAC  GCTT TTATT    AGATCAAAACCAGT  CGGTTA-------  cac-gt  --------TAACCG  TTTGACTTGGTGACTCTG  AATAA  CTTTGTGCTGA  TCGCACGGT  CTC-GC  ACCGGCGA  CGC  ATCTTTCAAATGTCTGA  CTTATCAACTGTCGATGGTAGG  TTCTGCG  CCTACCATGGTTGTAACGGG  TAA CGGGGAAT  CAGG  GTTCGATTCCG  GAG    A    GGGAGC  CTGAGAAACG  GCTACC  A  CATC  CAAG  GAAG  GCA  GCAGGCGC  GCAAA  TTACCCACTCCCG  GCA  CGGGGAGGTA  G  TGACGAAAA
CHE_Epitranus_sp1_D1774_vxyz                        ---  -----  ---  ---  -  -----  -  -----------  -  --------  -------------  --  ---------------  -------  -----------  ------  ---  ------  --------------------  ------  ----  ----  ---------------  -----  ----------------  ---------  ----------  ----  ----------  ---- -----    --------------  -------------  ------  --------------  ------------------  -----  -----------  ---------  ------  --------  ---  -----------------  ----------------------  -------  --------------------  --- --------  ----  -----------  ---    -    ------  ----------  ------  -  ----  ----  ----  ---  --------  -----  -------------  ---  ----------  -  ---------
CHE_Epitranus_sp2_D1824_xyz                         ---  -----  ---  ---  -  -----  -  -----------  -  --------  -------------  --  ---------------  -------  -----------  ------  ---  ------  --------------------  ------  ----  ----  ---------------  -----  ----------------  ---------  ----------  ----  ----------  ---- -----    --------------  -------------  ------  --------------  ------------------  -----  -----------  ---------  ------  --------  ---  -----------------  ----------------------  -------  --------------------  --- --------  ----  -----------  ---    -    ------  ----------  ------  -  ----  ----  ----  ---  --------  -----  -------------  ---  ----------  -  ---------
CHE_Epitranus_sp3_D2685_tuvxyz                      TAC  CTGGT  TGA  TCC  T  GCCAG  T  AGTCATATGCT  T  GTCTCAAA  GATTAAGCCATGC  AT  GTCTCAGTGCAAGCC  GAGTTAA  GGTGAAACCGC  GAATGG  CTC  ATTAAA  TCAGTTATGGTTCCTTGGAT  CGTACC  CACA  TTTA  CTTGGATAACTGTGG  TAATT  CTAGAGCTAATACATG  CAAACCAGA  GTTCCGACCA  GAGA  TGGAAGGAAC  GCTT TTATT    AGATCAAAACCAAT  CGGTGT-CGAG--  tt--cg  --CTCGT-TCACCG  TTTACCTTGGTGACTCTG  AATAA  CTTTGTGCTGA  TCGCACGGT  CTC-GC  ACCGGCGA  CGC  ATCTTTCAAATGTCTGC  CTTATCAACTGTCGATGGTAGG  TTCTGCG  CCTACCATGGTTGTAACGGG  TAA CGGGGAAT  CAGG  GTTCGATTCCG  GAG    A    GGGAGC  CTGAGAAACG  GCTACC  A  CATC  CAAG  GAAG  GCA  GCAGGCGC  GCAAA  TTACCCACTCCCG  GCA  CGGGGAGGTA  G  TGACGAAAA
CHHA_Antrocephalus_sp1_D1838_uxyz                   ---  -----  ---  ---  -  -----  -  -----------  -  --------  -------------  --  ---------------  -------  -----------  ------  ---  ------  --------------------  ------  ----  ----  ---------------  -----  ----------------  ---------  ----------  ----  ----------  ---- -----    --------------  -------------  ------  --------------  ------------------  -----  -----------  ---------  ------  --------  ---  -----------------  ----------------------  -------  --------------------  --- --------  ----  -----------  ---    -    ------  ----------  ------  -  ----  ----  ----  ---  --------  -----  -------------  ---  ----------  -  ---------
CHHA_Antrocephalus_sp2_D1874_uvxyz                  ---  -----  ---  ---  -  -----  -  -----------  -  --------  -------------  --  ---------------  -------  -----------  ------  ---  ------  --------------------  ------  ----  ----  ---------------  -----  ----------------  ---------  ----------  ----  ----------  ---- -----    --------------  -------------  ------  --------------  ------------------  -----  -----------  ---------  ------  --------  ---  -----------------  ----------------------  -------  --------------------  --- --------  ----  -----------  ---    -    ------  ----------  ------  -  ----  ----  ----  ---  --------  -----  -------------  ---  ----------  -  ---------
CHHA_Antrocephalus_sp3_D1883_uvxyz                  ---  -----  ---  ---  -  -----  -  -----------  -  --------  -------------  --  ---------------  -------  -----------  ------  ---  ------  --------------------  ------  ----  ----  ---------------  -----  ----------------  ---------  ----------  ----  ----------  ---- -----    --------------  -------------  ------  --------------  ------------------  -----  -----------  ---------  ------  --------  ---  -----------------  ----------------------  -------  --------------------  --- --------  ----  -----------  ---    -    ------  ----------  ------  -  ----  ----  ----  ---  --------  -----  -------------  ---  ----------  -  ---------
CHHA_Antrocephalus_sp4_D1891_tuvxyz                 TAC  CTGGT  TGA  TCC  T  GCCAG  T  AGTCATATGCT  T  GTCTCAAA  GATTAAGCCATGC  AT  GTCTCAGTGCAAGCC  AAATTAA  GGTGAAACCGC  GAATGG  CTC  ATTAAA  TCAGTTATGGTTCCTTAGAT  CGTACC  CACA  TTTA  CTTGGATAACTGTGG  TAATT  CTAGAGCTAATACATG  CAAACCAGA  GTTCCGACCA  GAGA  TGGGAGGAAC  GCTT TTATT    AGATCAAAACCAAT  CGGTGG-CGTGT-  gtaaca  -GCTCGT-CCACCG  TTTACCTTGGTGACTCTG  AATAA  CTTTGTGCTGA  TCGCACGGT  CTC-GC  ACCGGCGA  CGC  ATCTTTCAAATGTCTGC  CTTATCAACTGTCGATGGTAGG  TTCTGCG  CCTACCATGGTTGTAACGGG  TAA CGGGGAAT  CAGG  GTTCGATTCCG  GAG    A    GGGAGC  CTGAGAAACG  GCTACC  A  CATC  CAAG  GAAG  GCA  GCAGGCGC  GCAAA  TTACCCACTCCCG  GCA  CGGGGAGGTA  G  TGACGAAAA
CHHA_Antrocephalus_sp5_D1892_xyz                    ---  -----  ---  ---  -  -----  -  -----------  -  --------  -------------  --  ---------------  -------  -----------  ------  ---  ------  --------------------  ------  ----  ----  ---------------  -----  ----------------  ---------  ----------  ----  ----------  ---- -----    --------------  -------------  ------  --------------  ------------------  -----  -----------  ---------  ------  --------  ---  -----------------  ----------------------  -------  --------------------  --- --------  ----  -----------  ---    -    ------  ----------  ------  -  ----  ----  ----  ---  --------  -----  -------------  ---  ----------  -  ---------
CHHA_Aspirrhina_sp_D1780_uvxyz                      ---  -----  ---  ---  -  -----  -  -----------  -  --------  -------------  --  ---------------  -------  -----------  ------  ---  ------  --------------------  ------  ----  ----  ---------------  -----  ----------------  ---------  ----------  ----  ----------  ---- -----    --------------  -------------  ------  --------------  ------------------  -----  -----------  ---------  ------  --------  ---  -----------------  ----------------------  -------  --------------------  --- --------  ----  -----------  ---    -    ------  ----------  ------  -  ----  ----  ----  ---  --------  -----  -------------  ---  ----------  -  ---------
CHHA_Haltichella_sp_D1781_uvxyz                     ---  -----  ---  ---  -  -----  -  -----------  -  --------  -------------  --  ---------------  -------  -----------  ------  ---  ------  --------------------  ------  ----  ----  ---------------  -----  ----------------  ---------  ----------  ----  ----------  ---- -----    --------------  -------------  ------  --------------  ------------------  -----  -----------  ---------  ------  --------  ---  -----------------  ----------------------  -------  --------------------  --- --------  ----  -----------  ---    -    ------  ----------  ------  -  ----  ----  ----  ---  --------  -----  -------------  ---  ----------  -  ---------
CHHA_Hockeria_sp_D1796_tuvxyz                       TAC  CTGGT  TGA  TCC  T  GCCAG  T  AGTCATATGCT  T  GTCTCAAA  GATTAAGCCATGC  AT  GTCTCAGTGCAAGCC  GAATTAA  GGTGAAACCGC  GAATGG  CTC  ATTAAA  TCAGTTATGGTTCCTTAGAT  CGTACC  CACA  TTTA  CTTGGATAACTGTGG  TAATT  CTAGAGCTAATACATG  CAAACCAGA  GTTCCGACCA  GAGA  TGGGAGGAAC  GCTT TTATT    AGATCAAAACCAAT  CGGTGG-CGGG--  ttaact  --CTCGT-CCACCG  TTTACCTTGGTGACTCTG  AATAA  CTTTGTGCTGA  TCGCACGGT  CTC-GC  ACCGGCGA  CGC  ATCTTTCAAATGTCTGC  CTTATCAACTGTCGATGGTAGG  TTCTGCG  CCTACCATGGTTGTAACGGG  TAA CGGGGAAT  CAGG  GTTCGATTCCG  GAG    A    GGGAGC  CTGAGAAACG  GCTACC  A  CATC  CAAG  GAAG  GCA  GCAGGCGC  GCAAA  TTACCCACTCCCG  GCA  CGGGGAGGTA  G  TGACGAAAA
CHHA_Kriechbaumerella_sp_D1885_uvxyz                ---  -----  ---  ---  -  -----  -  -----------  -  --------  -------------  --  ---------------  -------  -----------  ------  ---  ------  --------------------  ------  ----  ----  ---------------  -----  ----------------  ---------  ----------  ----  ----------  ---- -----    --------------  -------------  ------  --------------  ------------------  -----  -----------  ---------  ------  --------  ---  -----------------  ----------------------  -------  --------------------  --- --------  ----  -----------  ---    -    ------  ----------  ------  -  ----  ----  ----  ---  --------  -----  -------------  ---  ----------  -  ---------
CHHY_Irichohalticella_sp_D1882_uvxyz                ---  -----  ---  ---  -  -----  -  -----------  -  --------  -------------  --  ---------------  -------  -----------  ------  ---  ------  --------------------  ------  ----  ----  ---------------  -----  ----------------  ---------  ----------  ----  ----------  ---- -----    --------------  -------------  ------  --------------  ------------------  -----  -----------  ---------  ------  --------  ---  -----------------  ----------------------  -------  --------------------  --- --------  ----  -----------  ---    -    ------  ----------  ------  -  ----  ----  ----  ---  --------  -----  -------------  ---  ----------  -  ---------
CHHY_Notaspidium_sp_D2525_uvxyz                     ---  -----  ---  ---  -  -----  -  -----------  -  --------  -------------  --  ---------------  -------  -----------  ------  ---  ------  --------------------  ------  ----  ----  ---------------  -----  ----------------  ---------  ----------  ----  ----------  ---- -----    --------------  -------------  ------  --------------  ------------------  -----  -----------  ---------  ------  --------  ---  -----------------  ----------------------  -------  --------------------  --- --------  ----  -----------  ---    -    ------  ----------  ------  -  ----  ----  ----  ---  --------  -----  -------------  ---  ----------  -  ---------
CHHY_Schwarzella_arizonensis_D2548_xy               ---  -----  ---  ---  -  -----  -  -----------  -  --------  -------------  --  ---------------  -------  -----------  ------  ---  ------  --------------------  ------  ----  ----  ---------------  -----  ----------------  ---------  ----------  ----  ----------  ---- -----    --------------  -------------  ------  --------------  ------------------  -----  -----------  ---------  ------  --------  ---  -----------------  ----------------------  -------  --------------------  --- --------  ----  -----------  ---    -    ------  ----------  ------  -  ----  ----  ----  ---  --------  -----  -------------  ---  ----------  -  ---------
CHS_Smicromorpha_sp_D2651_tuvxyz                    TAC  CTGGT  TGA  TCC  T  GCCAG  T  AGTCATATGCT  T  GTCTCAAA  GATTAAGCCATGC  AT  GTCTCAGTGCAAGCC  AAATTAA  GGTGAAACCGC  GAATGG  CTC  ATTAAA  TCAGTTATGGTTTCTTAGAT  CCTACT  AA-A  TTTA  CTTGGATAACTGTGG  TAATT  CTAGAGCTAATACATG  CAAACTTGA  GTTCCGACCA  GAGA  TGGAAGGGAT  GCTT TTATT    AGATCAAAACCAAT  CGGTGT-CGGG--  tt--tt  --CTCGT-ACACCG  TTTACTTTGGTGACTCTG  AATAA  CTTTGTGCTGA  TCGCACGGT  CTC-GC  ACCGGCGA  CGC  ATCTTTCAAATGTCTGC  CTTATCAACTGTCGATGGTAGG  CTCTGCG  CCTACCATGGTTGTAACGGG  TAA CGGGGAAT  CAGG  GTTCGATTCCG  GAG    A    GGGAGC  CTGAGAAACG  GCTACC  A  CATC  CAAG  GAAG  GCA  GCAGGCGC  GCAAA  TTACCCACTCCCG  GCA  CGGGGAGGTA  G  TGACGAAAA
ELE_Chrysocharis_sp_D2157_tvxyz                     ---  -----  ---  ---  -  -----  -  -----------  -  --------  -------------  --  ---------------  -------  -----------  ------  ---  ------  ------------CCTTAGAT  CGTACC  CACA  TTTA  CTTGGATAACTGTGG  TAATT  CTAGAGCTAATACATG  CAAACCAGA  GTTCCGACCA  GAGA  TGGAAGGAAC  GCTT TTATT    AGATCAAAACCAAT  CGGTGG-CGGG--  tt--cg  --CTCGT-CCACCG  TTTACTTTGGTGACTCTG  AATAA  CTTTGTGCTGA  TCGTACGGC  CTA-GC  GCCGACGA  CGC  ATCTTTCAAATGTCTGC  CTTATCAACTGTCGATGGTAGG  TTCTGCG  CCTACCATGGTTGTAACGGG  TAA CGGGGAAT  CAGG  GTTCGATTCCG  GAG    A    GGGAGC  CTGAGAAACG  GCTACC  A  CATC  CAAG  GAAG  GCA  GCAGGCGC  GCAAA  TTACCCACTCCCG  GCA  CGGGGAGGTA  G  TGACGAAAA
ELE_Closterocerus_trifasciatus_D1932_tuxyz          ---  -----  ---  ---  -  -----  -  -----------  -  --------  -------------  --  ---------------  -------  -----------  ------  ---  ------  ------------CCTTAGAT  CGTACC  CACA  TTTA  CTTGGATAACTGTGG  TAATT  CTAGAGCTAATACATG  CAAACCAGA  GTTCCGACCA  GAGA  TGGAAGGAAC  GCTT TTATT    AGATCAAAACCAAT  CGGTGG-CGGG--  tt--cg  --CTCGT-CCACCG  TTTACCTTGGTGACTCTG  AATAA  CTTTGTGCTGA  TCGTATGGT  CTC-GT  ACCGACGA  CGC  ATCTTTCAAATGTCTGC  CTTATCAACTGTCGATGGTAGG  TTCTGCG  CCTACCATGGTTGTAACGGG  TAA CGGGGAAT  CAGG  GTTCGATTCCG  GAG    A    GGGAGC  CTGAGAAACG  GCTACC  A  CATC  CAAG  GAAG  GCA  GCAGGCGC  GCAAA  TTACCCACTCCCG  GCA  CGGGGAGGTA  G  TGACGAAAA
ELE_Dasyomphale_chilensis_D2189_uvxyz               ---  -----  ---  ---  -  -----  -  -----------  -  --------  -------------  --  ---------------  -------  -----------  ------  ---  ------  --------------------  ------  ----  ----  ---------------  -----  ----------------  ---------  ----------  ----  ----------  ---- -----    --------------  -------------  ------  --------------  ------------------  -----  -----------  ---------  ------  --------  ---  -----------------  ----------------------  -------  --------------------  --- --------  ----  -----------  ---    -    ------  ----------  ------  -  ----  ----  ----  ---  --------  -----  -------------  ---  ----------  -  ---------
ELE_Entedon_zanara_D1936_txz                        ---  -----  ---  ---  -  -----  -  -----------  -  --------  -------------  --  ---------------  -------  -----------  ------  ---  ------  ------------CCTTAGAT  CGTACC  CACA  TTTA  CTTGGATAACTGTGG  TAATT  CTAGAGCTAATACATG  CAAACCAGA  GTTCCGACCA  GAGA  TGGAAGGAAC  GCTT TTATT    AGATCAAAACCAAT  CGGTGG-CGGG--  tt--cg  --CTCGT-CCACCG  TTTACTTTGGTGACTCTG  AATAA  CTTTGTGCTGA  TCGTACGGC  CCA-GT  GCCGGCGA  CGC  ATCTTTCAAATGTCTGC  CTTATCAACTGTCGATGGTAGG  TTCTGCG  CCTACCATGGTTGTAACGGG  TAA CGGGGAAT  CAGG  GTTCGATTCCG  GAG    A    GGGAGC  CTGAGAAACG  GCTACC  A  CATC  CAAG  GAAG  GCA  GCAGGCGC  GCAAA  TTACCCACTCCCG  GCA  CGGGGAGGTA  G  TGACGAAAA
ELE_Entedononecremnus_krauteri_D0041_xyz            ---  -----  ---  ---  -  -----  -  -----------  -  --------  -------------  --  ---------------  -------  -----------  ------  ---  ------  --------------------  ------  ----  ----  ---------------  -----  ----------------  ---------  ----------  ----  ----------  ---- -----    --------------  -------------  ------  --------------  ------------------  -----  -----------  ---------  ------  --------  ---  -----------------  ----------------------  -------  --------------------  --- --------  ----  -----------  ---    -    ------  ----------  ------  -  ----  ----  ----  ---  --------  -----  -------------  ---  ----------  -  ---------
ELE_Euderomphale_sp_D2557_vxyz                      ---  -----  ---  ---  -  -----  -  -----------  -  --------  -------------  --  ---------------  -------  -----------  ------  ---  ------  --------------------  ------  ----  ----  ---------------  -----  ----------------  ---------  ----------  ----  ----------  ---- -----    --------------  -------------  ------  --------------  ------------------  -----  -----------  ---------  ------  --------  ---  -----------------  ----------------------  -------  --------------------  --- --------  ----  -----------  ---    -    ------  ----------  ------  -  ----  ----  ----  ---  --------  -----  -------------  ---  ----------  -  ---------
ELE_Neopomphale_sp_D2192_xyz                        ---  -----  ---  ---  -  -----  -  -----------  -  --------  -------------  --  ---------------  -------  -----------  ------  ---  ------  --------------------  ------  ----  ----  ---------------  -----  ----------------  ---------  ----------  ----  ----------  ---- -----    --------------  -------------  ------  --------------  ------------------  -----  -----------  ---------  ------  --------  ---  -----------------  ----------------------  -------  --------------------  --- --------  ----  -----------  ---    -    ------  ----------  ------  -  ----  ----  ----  ---  --------  -----  -------------  ---  ----------  -  ---------
ELE_Trisecodes_agromyzae_D2244_tuvxyz               TAC  CTGGT  TGA  TCC  T  GCCAG  T  AGTCATATGCT  T  GTCTCAAA  GATTAAGCCATGC  AT  GTCTCAGTGCATGCC  GAATTAA  GGTGAAACCGC  GAATGG  CTC  ATTAAA  TCAGTTATGGTTCCTTAGAT  CGTACT  CACA  TTTA  CTTGGATAACTGTGG  TAATT  CTAGAGCTAATACATG  CAAACCAGA  GTTCCGACCA  GAGA  TGGAAGGAAC  GCTT TTATT    AGATCAAAACCAAT  CGGTGG-CGGAT-  t---cc  -GTCCGT-CCACCG  TTTATCTTGGTGACTCTG  AATAA  CTTTGTGCTGA  TCGCACGGT  CTA-GC  ACCGGCGA  CGC  ATCTTTCAAATGTCTGC  CTTATCAACTGTCGATGGTAGG  TTCTGCG  CCTACCATGGTTGTAACGGG  TAA CGGGGAAT  CAGG  GTTCGATTCCG  GAG    A    GGGAGC  CTGAGAAACG  GCTACC  A  CATC  CAAG  GAAG  GCA  GCAGGCGC  GCAAA  TTACCCACTCCCG  GCA  CGGGGAGGTA  G  TGACGAAAA
ELO_Ophelimus_sp_D1559_uvxyz                           ---  -----  ---  ---  -  -----  -  -----------  -  --------  -------------  --  ---------------  -------  -----------  ------  ---  ------  --------------------  ------  ----  ----  ---------------  -----  ----------------  ---------  ----------  ----  ----------  ---- -----    --------------  -------------  ------  --------------  ------------------  -----  -----------  ---------  ------  --------  ---  -----------------  ----------------------  -------  --------------------  --- --------  ----  -----------  ---    -    ------  ----------  ------  -  ----  ----  ----  ---  --------  -----  -------------  ---  ----------  -  ---------
ELN_Acrias_sp_D2044_uvxyz                           ---  -----  ---  ---  -  -----  -  -----------  -  --------  -------------  --  ---------------  -------  -----------  ------  ---  ------  --------------------  ------  ----  ----  ---------------  -----  ----------------  ---------  ----------  ----  ----------  ---- -----    --------------  -------------  ------  --------------  ------------------  -----  -----------  ---------  ------  --------  ---  -----------------  ----------------------  -------  --------------------  --- --------  ----  -----------  ---    -    ------  ----------  ------  -  ----  ----  ----  ---  --------  -----  -------------  ---  ----------  -  ---------
ELN_Astichus_mirissimus_D0695_uvxyz                 ---  -----  ---  ---  -  -----  -  -----------  -  --------  -------------  --  ---------------  -------  -----------  ------  ---  ------  --------------------  ------  ----  ----  ---------------  -----  ----------------  ---------  ----------  ----  ----------  ---- -----    --------------  -------------  ------  --------------  ------------------  -----  -----------  ---------  ------  --------  ---  -----------------  ----------------------  -------  --------------------  --- --------  ----  -----------  ---    -    ------  ----------  ------  -  ----  ----  ----  ---  --------  -----  -------------  ---  ----------  -  ---------
ELN_Astichus_sp_D0693_uvxyz                         ---  -----  ---  ---  -  -----  -  -----------  -  --------  -------------  --  ---------------  -------  -----------  ------  ---  ------  --------------------  ------  ----  ----  ---------------  -----  ----------------  ---------  ----------  ----  ----------  ---- -----    --------------  -------------  ------  --------------  ------------------  -----  -----------  ---------  ------  --------  ---  -----------------  ----------------------  -------  --------------------  --- --------  ----  -----------  ---    -    ------  ----------  ------  -  ----  ----  ----  ---  --------  -----  -------------  ---  ----------  -  ---------
ELN_Bellerus_sp_D2028_tuxyz                         TAC  CTGGT  TGA  TCC  T  GCCAG  T  AGTCATATGCT  T  GTCTCAAA  GATTAAGCCATGC  AT  GTCTCAGTGCATGCC  GAATTAA  GGTGAAACCGC  GAATGG  CTC  ATTAAA  TCAGTTATGGTTCCTTAGAT  CGTACC  CACA  TTTA  CTTGGATAACTGTGG  TAATT  CTAGAGCTAATACATG  CAAACCAGA  GTTCCGACCA  GAGA  TGGAAGGAAC  GCTT TTATT    AGATCAAAACCAAT  CGGTGG-CGAG--  tt--cg  --CTCGT-CCACCG  TTTACCTTGGTGACTCTG  AATAA  CTTTGTGCTGA  TCGCACGGT  CTC-GC  ACCGGCGA  CGC  ATCTTTCAAATGTCTGC  CTTATCAACTGTCGATGGTAGG  TTCTGCG  CCTACCATGGTTGTAACGGG  TAA CGGGGAAT  CAGG  GTTCGATTCCG  GAG    A    GGGAGC  CTGAGAAACG  GCTACC  A  CATC  CAAG  GAAG  GCA  GCAGGCGC  GCAAA  TTACCCACTCCCG  GCA  CGGGGAGGTA  G  TGACGAAAA
ELN_Euderus_sp_D0703_tuxy                           ---  -----  ---  ---  -  -----  -  -----------  -  --------  -------------  --  ---------------  -------  -----------  ------  ---  ------  ------------CCTTAGAT  CGTACC  CACA  TTTA  CTTGGATAACTGTGG  TAATT  CTAGAGCTAATACATG  CAAACCAGA  GTTCCGACCA  GAGA  TGGAAGGAAC  GCTT TTATT    AGATCAAAACCAAT  CGGTGG-CGG---  ctc-gt  ---CCGT-CCACCG  TTTACCTTGGTGACTCTG  AATAA  CTTTGTGCTGA  TCGCACGGT  CTC-GC  ACCGGCGA  CGC  ATCTTTCAAATGTCTGC  CTTATCAACTGTCGATGGTAGG  TTCTGCG  CCTACCATGGTTGTAACGGG  TAA CGGGGAAT  CAGG  GTTCGATTCCG  GAG    A    GGGAGC  CTGAGAAACG  GCTACC  A  CATC  CAAG  GAAG  GCA  GCAGGCGC  GCAAA  TTACCCACTCCCG  GCA  CGGGGAGGTA  G  TGACGAAAA
ELN_Hubbardiella_sp_D0806_uvxyz                     ---  -----  ---  ---  -  -----  -  -----------  -  --------  -------------  --  ---------------  -------  -----------  ------  ---  ------  --------------------  ------  ----  ----  ---------------  -----  ----------------  ---------  ----------  ----  ----------  ---- -----    --------------  -------------  ------  --------------  ------------------  -----  -----------  ---------  ------  --------  ---  -----------------  ----------------------  -------  --------------------  --- --------  ----  -----------  ---    -    ------  ----------  ------  -  ----  ----  ----  ---  --------  -----  -------------  ---  ----------  -  ---------
ELT_Aprostocetus_sp_D0098_tuxyz                     ---  -----  ---  ---  -  -----  -  -----------  -  --------  -------------  --  ---------------  -------  -----------  ------  ---  ------  ------------CCTTAGAT  CGTACC  CACA  TTTA  CTTGGATAACTGTGG  TAATT  CTAGAGCTAATACATG  CAAACCAGA  GTTCCGACCA  GAGA  TGGAAGGAAC  GCTT TTATT    AGATCAAAACCAAT  CGGTGG-CGGG--  tt--cg  --CTCGT-CCACCG  TTTACTTTGGTGACTCTG  AATAA  CTTTGTGCTGA  TCGCATGGT  CTC-GT  ACCGGCGA  CGC  ATCTTTCAAATGTCTGC  CTTATCAACTGTCGATGGTAGG  TTCTGCG  CCTACCATGGTTGTAACGGG  TAA CGGGGAAT  CAGG  GTTCGATTCCG  GAG    A    GGGAGC  CTGAGAAACG  GCTACC  A  CATC  CAAG  GAAG  GCA  GCAGGCGC  GCAAA  TTACCCACTCCCG  GCA  CGGGGAGGTA  G  TGACGAAAA
ELT_Crataepus_marbis_D2646_xyz                      ---  -----  ---  ---  -  -----  -  -----------  -  --------  -------------  --  ---------------  -------  -----------  ------  ---  ------  --------------------  ------  ----  ----  ---------------  -----  ----------------  ---------  ----------  ----  ----------  ---- -----    --------------  -------------  ------  --------------  ------------------  -----  -----------  ---------  ------  --------  ---  -----------------  ----------------------  -------  --------------------  --- --------  ----  -----------  ---    -    ------  ----------  ------  -  ----  ----  ----  ---  --------  -----  -------------  ---  ----------  -  ---------
ELT_Hadrotrichodes_waukheon_D2585_tuvxyz            TAC  CTGGT  TGA  TCC  T  GCCAG  T  AGTCATATGCT  T  GTCTCAAA  GATTAAGCCATGC  AT  GTCTCAGTGCATGCC  GAATTAA  GGTGAAACCGC  GAATGG  CTC  ATTAAA  TCAGTTATGGTTCCTTAGAT  CGTACC  CACA  TTTA  CTTGGATAACTGTGG  TAATT  CTAGAGCTAATACATG  CAAACCAGA  GTTCCGACCA  GAGA  TGGAAGGAAC  GCTT TTATT    AGATCAAAACCAAT  CGGTGG-CGGG--  ct--tg  --CTCGT-CCACCG  TTTACTTTGGTGACTCTG  AATAA  CTTTGTGCTGA  TCGCATGGT  CTC-GT  ACCGGCGA  CGC  ATCTTTCAAATGTCTGC  CTTATCAACTGTCGATGGTAGG  TTCTGCG  CCTACCATGGTTGTAACGGG  TAA CGGGGAAT  CAGG  GTTCGATTCCG  GAG    A    GGGAGC  CTGAGAAACG  GCTACC  A  CATC  CAAG  GAAG  GCA  GCAGGCGC  GCAAA  TTACCCACTCCCG  GCA  CGGGGAGGTA  G  TGACGAAAA
ELU_Cirrospilus_coachellae_D1647_tuvxyz             TAC  CTGGT  TGA  TCC  T  GCCAG  T  AGTCATATGCT  T  GTCTCAAA  GATTAAGCCATGC  AT  GTCTCAGTACATGCC  GAATTAA  GGTGAAACCGC  GAATGG  CTC  ATTAAA  TCAGTTATGGTTCCTTAGAT  CGTACC  CACA  TTTA  CTTGGATAACTGTGG  TAATT  CTAGAGCTAATACATG  CAAACTAGA  GTTCCGACCA  GAGA  TGGAAGGAAC  GCTT TTATT    AGATCAAAACCAAT  CGGTGG-CTGG--  ct--cg  --CCGGT-CCACCG  TTTACTTTGGTGACTCTG  AATAA  CTTTGTGCTGA  TCGCACGGT  CTC-GC  ACCGGCGA  CGC  ATCTTTCAAATGTCTGC  CTTATCAACTTTCGATGGTAGG  TTCTGCG  CCTACCATGGTTGTAACGGG  TAA CGGGGAAT  CAGG  GTTCGATTCCG  GAG    A    GGGAGC  CTGAGAAACG  GCTACC  A  CATC  CAAG  GAAG  GCA  GCAGGCGC  GCAAA  TTACCCACTCCCG  GCA  CGGGGAGGTA  G  TGACGAAAA
ELU_Elachertus_sp_D1580_txyz                        ---  -----  ---  ---  -  -----  -  -----------  -  --------  -------------  --  ---------------  -------  -----------  ------  ---  ------  ------------CCTTAGAT  CGTACC  CACA  TTTA  CTTGGATAACTGTGG  TAATT  CTAGAGCTAATACATG  CAAACCAGA  GTTCCGACCA  GAGA  TGGAAGGAAC  GCTT TTATT    AGATCAAAACCAAT  CGGTGG-CTGG--  ct--cg  --CCAGT-CCATCG  TTTACTTTGGTGACTCTG  AATAA  CTTTGTGCTGA  TCGCATGGT  CTC-GC  ACCGGCGA  CGC  ATCTTTCAAATGTCTGC  CTTATCAACTGTCGATGGTAGG  TTCTGCG  CCTACCATGGTTGTAACGGG  TAA CGGGGAAT  CAGG  GTTCGATTCCG  GAG    A    GGGAGC  CTGAGAAACG  GCTACC  A  CATC  CAAG  GAAG  GCA  GCAGGCGC  GCAAA  TTACCCACTCCCG  GCA  CGGGGAGGTA  G  TGACGAAAA
ELU_Elasmus_polistis_D0137_tuxyz                    ---  -----  ---  ---  -  -----  -  -----------  -  --------  -------------  --  ---------------  -------  -----------  ------  ---  ------  ------------CCTTAGAT  CGTACC  CACA  TTTA  CTTGGATAACTGTGG  TAATT  CTAGAGCTAATACATG  CAAACCAGA  GTTCCGACCA  GAGA  TGGAAGGAAC  GCTT TTATT    AGATCAAAACCAAT  CGGTGG-CTGG--  tt--cg  --CCAGT-CCATCG  TTTACTTTGGTGACTCTG  AATAA  CTTTGTGCTGA  TCGCATGGT  CTC-GC  ACCGGCGA  CGC  ATCTTTCAAATGTCTGC  CTTATCAACTGTCGATGGTAGG  TTCTGCG  CCTACCATGGTTGTAACGGG  TAA CGGGGAAT  CAGG  GTTCGATTCCG  GAG    A    GGGAGC  CTGAGAAACG  GCTACC  A  CATC  CAAG  GAAG  GCA  GCAGGCGC  GCAAA  TTACCCACTCCCG  GCA  CGGGGAGGTA  G  TGACGAAAA
ELU_Eulophus_sp_D1619_tuxyz                         ---  -----  ---  ---  -  -----  -  -----------  -  --------  -------------  --  ---------------  -------  -----------  ------  ---  ------  ------------CCTTAGAT  CGTACC  CACA  TTTA  CTTGGATAACTGTGG  TAATT  CTAGAGCTAATACATG  CAAACCAGA  GTTCCGACCA  GAGA  TGGAAGGAAC  GCTT TTATT    AGATCAAAACCAAT  CGGTGG-CCGG--  tt--cg  --CCGGT-CCATCG  TTTACTTTGGTGACTCTG  AATAA  CTTTGTGCTGA  TCGCATGGT  CTC-GT  ACCGGCGA  CGC  ATCTTTCAAATGTCTGC  CTTATCAACTGTCGATGGTAGG  TTCTGCG  CCTACCATGGTTGTAACGGG  TAA CGGGGAAT  CAGG  GTTCGATTCCG  GAG    A    GGGAGC  CTGAGAAACG  GCTACC  A  CATC  CAAG  GAAG  GCA  GCAGGCGC  GCAAA  TTACCCACTCCCG  GCA  CGGGGAGGTA  G  TGACGAAAA
ELU_Euplectrus_sp_D2168_tvxyz                       ---  -----  ---  ---  -  -----  -  -----------  -  --------  -------------  --  ---------------  -------  -----------  ------  ---  ------  ------------CCTTAGAT  CGTACC  CACA  TTTA  CTTGGATAACTGTGG  TAATT  CTAGAGCTAATACATG  CAAACCAGA  GTTCCGACCA  GAGA  TGGAAGGAAC  GCTT TTATT    AGATCAAAACCAAT  CGGTGG-CTGG--  tt--ca  --CCAGT-CCATCG  TTTACTTTGGTGACTCTG  AATAA  CTTTGTGCTGA  TCGCATGGT  CTC-GC  ACCGGCGA  CGC  ATCTTTCAAATGTCTGC  CTTATCAACTGTCGATGGTAGG  TTCTGCG  CCTACCATGGTTGTAACGGG  TAA CGGGGAAT  CAGG  GTTCGATTCCG  GAG    A    GGGAGC  CTGAGAAACG  GCTACC  A  CATC  CAAG  GAAG  GCA  GCAGGCGC  GCAAA  TTACCCACTCCCG  GCA  CGGGGAGGTA  G  TGACGAAAA
ELU_Perthiola_mazaneci_D2826_tuvxyz                 TAC  CTGGT  TGA  TCC  T  GCCAG  T  AGTCATATGCT  T  GTCTCAAA  GATTAAGCCATGC  AT  GTCTCAGTACATGCC  GAATTAA  GGTGAAACCGC  GAATGG  CTC  ATTAAA  TCAGTTATGGTTCCTTAGAT  CGTACC  CACA  TTTA  CTTGGATAACTGTGG  TAATT  CTAGAGCTAATACATG  CAAACCAGA  GTTCCGACCA  GAGA  TGGAAGGAAC  GCTT TTATT    AGATCAAAACCAAT  CGGTGG-CGGGT-  t---tc  -ACCCGT-CCATCG  TATACCTTGGTGACTCTG  AGTAA  CTTTGTGCTGA  TCGCATGGT  CTC-GT  ACCGGCGA  CGC  ATCTTTCAAATGTCTGC  CTTATCAACTGTCGATGGTAGG  TTCTGCG  CCTACCATGGTTGTAACGGG  TAA CGGGGAAT  CAGG  GTTCGATTCCG  GAG    A    GGGAGC  CTGAGAAACG  GCTACC  A  CATC  CAAG  GAAG  GCA  GCAGGCGC  GCAAA  TTACCCACTCCCG  GCA  CGGGGAGGTA  G  TGACGAAAA
ELU_Elachertus_sp_D2049_tvxyz                       ---  -----  ---  ---  -  -----  -  -----------  -  --------  -------------  --  ---------------  -------  -----------  ------  ---  ------  ------------CCTTAGAT  CGTACC  CACA  TTTA  CTTGGATAACTGTGG  TAATT  CTAGAGCTAATACATG  CAAACCAGA  GTTCCGACCA  GAGA  TGGAAGGAAC  GCTT TTATT    AGATCAAAACCAAT  CGGTGG-CTGG--  tt--cg  --CCAGT-CCATCG  TTTACTTTGGTGACTCTG  AATAA  CTTTGTGCTGA  TCGCATGGT  CTC-GC  ACCGGCGA  CGC  ATCTTTCAAATGTCTGC  CTTATCAACTGTCGATGGTAGG  TTCTGCG  CCTACCATGGTTGTAACGGG  TAA CGGGGAAT  CAGG  GTTCGATTCCG  GAG    A    GGGAGC  CTGAGAAACG  GCTACC  A  CATC  CAAG  GAAG  GCA  GCAGGCGC  GCAAA  TTACCCACTCCCG  GCA  CGGGGAGGTA  G  TGACGAAAA
ELU_Pnigalio_sp_D1497_tuvxyz                        ---  -----  ---  ---  -  -----  -  -----------  -  --------  -------------  --  ---------------  -------  -----------  ------  ---  ------  ------------CCTTAGAT  CGTACC  CACA  TTTA  CTTGGATAACTGTGG  TAATT  CTAGAGCTAATACATG  CAAACCAGA  GTTCCGACCA  GAGA  TGGAAGGAAC  GCTT TTATT    AGATCAAAACCAAT  CGGTGG-CTGG--  tt--cg  --CCAGT-CCATCG  TTTACTTTGGTGACTCTG  AATAA  CTTTGTGCTGA  TCGCATGGT  CTC-GC  ACCGGCGA  CGC  ATCTTTCAAATGTCTGC  CTTATCAACTGTCGATGGTAGG  TTCTGCG  CCTACCATGGTTGTAACGGG  TAA CGGGGAAT  CAGG  GTTCGATTCCG  GAG    A    GGGAGC  CTGAGAAACG  GCTACC  A  CATC  CAAG  GAAG  GCA  GCAGGCGC  GCAAA  TTACCCACTCCCG  GCA  CGGGGAGGTA  G  TGACGAAAA
ELU_Trichospilus_sp_D2108_tuvxyz                    TAC  CTGGT  TGA  TCC  T  GCCAG  T  AGTCATATGCT  T  GTCTCAAA  GATTAAGCCATGC  AT  GTCTCAGTGCATGCC  GAATTAA  GGTGAAACCGC  GAATGG  CTC  ATTAAA  TCAGTTATGGTTCCTTAGAT  CGTACC  CACA  TTTA  CTTGGATAACTGTGG  TAATT  CTAGAGCTAATACATG  CAAACCAGA  GTTCCGACCA  GAGA  TGGAAGGAAC  GCTT TTATT    AGATCAAAACCAAT  CGGTGG-CTGG--  ct--cg  --CCAGT-CCATCG  TTTACTTTGGTGACTCTG  AATAA  CTTTGTGCTGA  TCGCACGGT  CTC-GC  ACCGGCGA  CGC  ATCTTTCAAATGTCTGC  CTTATCAACTGTCGATGGTAGG  TTCTGCG  CCTACCATGGTTGTAACGGG  TAA CGGGGAAT  CAGG  GTTCGATTCCG  GAG    A    GGGAGC  CTGAGAAACG  GCTACC  A  CATC  CAAG  GAAG  GCA  GCAGGCGC  GCAAA  TTACCCACTCCCG  GCA  CGGGGAGGTA  G  TGACGAAAA
ELU_Zagrammosoma_americanum_D0111_uxyz              ---  -----  ---  ---  -  -----  -  -----------  -  --------  -------------  --  ---------------  -------  -----------  ------  ---  ------  --------------------  ------  ----  ----  ---------------  -----  ----------------  ---------  ----------  ----  ----------  ---- -----    --------------  -------------  ------  --------------  ------------------  -----  -----------  ---------  ------  --------  ---  -----------------  ----------------------  -------  --------------------  --- --------  ----  -----------  ---    -    ------  ----------  ------  -  ----  ----  ----  ---  --------  -----  -------------  ---  ----------  -  ---------
ENE_Acerophagus_sp_D0585_uvxyz                      ---  -----  ---  ---  -  -----  -  -----------  -  --------  -------------  --  ---------------  -------  -----------  ------  ---  ------  --------------------  ------  ----  ----  ---------------  -----  ----------------  ---------  ----------  ----  ----------  ---- -----    --------------  -------------  ------  --------------  ------------------  -----  -----------  ---------  ------  --------  ---  -----------------  ----------------------  -------  --------------------  --- --------  ----  -----------  ---    -    ------  ----------  ------  -  ----  ----  ----  ---  --------  -----  -------------  ---  ----------  -  ---------
ENE_Cheiloneurus_fulvescens_D1356_vxy               ---  -----  ---  ---  -  -----  -  -----------  -  --------  -------------  --  ---------------  -------  -----------  ------  ---  ------  --------------------  ------  ----  ----  ---------------  -----  ----------------  ---------  ----------  ----  ----------  ---- -----    --------------  -------------  ------  --------------  ------------------  -----  -----------  ---------  ------  --------  ---  -----------------  ----------------------  -------  --------------------  --- --------  ----  -----------  ---    -    ------  ----------  ------  -  ----  ----  ----  ---  --------  -----  -------------  ---  ----------  -  ---------
ENE_Comperiella_bifasciata_D0599_xy                 ---  -----  ---  ---  -  -----  -  -----------  -  --------  -------------  --  ---------------  -------  -----------  ------  ---  ------  --------------------  ------  ----  ----  ---------------  -----  ----------------  ---------  ----------  ----  ----------  ---- -----    --------------  -------------  ------  --------------  ------------------  -----  -----------  ---------  ------  --------  ---  -----------------  ----------------------  -------  --------------------  --- --------  ----  -----------  ---    -    ------  ----------  ------  -  ----  ----  ----  ---  --------  -----  -------------  ---  ----------  -  ---------
ENE_Copidosoma_floridanum_D0562_vxy                 ---  -----  ---  ---  -  -----  -  -----------  -  --------  -------------  --  ---------------  -------  -----------  ------  ---  ------  --------------------  ------  ----  ----  ---------------  -----  ----------------  ---------  ----------  ----  ----------  ---- -----    --------------  -------------  ------  --------------  ------------------  -----  -----------  ---------  ------  --------  ---  -----------------  ----------------------  -------  --------------------  --- --------  ----  -----------  ---    -    ------  ----------  ------  -  ----  ----  ----  ---  --------  -----  -------------  ---  ----------  -  ---------
ENE_Copidosoma_truncatellum_D0575_vxy               ---  -----  ---  ---  -  -----  -  -----------  -  --------  -------------  --  ---------------  -------  -----------  ------  ---  ------  --------------------  ------  ----  ----  ---------------  -----  ----------------  ---------  ----------  ----  ----------  ---- -----    --------------  -------------  ------  --------------  ------------------  -----  -----------  ---------  ------  --------  ---  -----------------  ----------------------  -------  --------------------  --- --------  ----  -----------  ---    -    ------  ----------  ------  -  ----  ----  ----  ---  --------  -----  -------------  ---  ----------  -  ---------
ENE_Metaphycus_sp_D0587_uvxyz                       ---  -----  ---  ---  -  -----  -  -----------  -  --------  -------------  --  ---------------  -------  -----------  ------  ---  ------  --------------------  ------  ----  ----  ---------------  -----  ----------------  ---------  ----------  ----  ----------  ---- -----    --------------  -------------  ------  --------------  ------------------  -----  -----------  ---------  ------  --------  ---  -----------------  ----------------------  -------  --------------------  --- --------  ----  -----------  ---    -    ------  ----------  ------  -  ----  ----  ----  ---  --------  -----  -------------  ---  ----------  -  ---------
ENE_Neocladia_sp_D2439_uxyz                         ---  -----  ---  ---  -  -----  -  -----------  -  --------  -------------  --  ---------------  -------  -----------  ------  ---  ------  --------------------  ------  ----  ----  ---------------  -----  ----------------  ---------  ----------  ----  ----------  ---- -----    --------------  -------------  ------  --------------  ------------------  -----  -----------  ---------  ------  --------  ---  -----------------  ----------------------  -------  --------------------  --- --------  ----  -----------  ---    -    ------  ----------  ------  -  ----  ----  ----  ---  --------  -----  -------------  ---  ----------  -  ---------
ENE_Plagiomerus_nr_diaspidis_D0569_uxy              ---  -----  ---  ---  -  -----  -  -----------  -  --------  -------------  --  ---------------  -------  -----------  ------  ---  ------  --------------------  ------  ----  ----  ---------------  -----  ----------------  ---------  ----------  ----  ----------  ---- -----    --------------  -------------  ------  --------------  ------------------  -----  -----------  ---------  ------  --------  ---  -----------------  ----------------------  -------  --------------------  --- --------  ----  -----------  ---    -    ------  ----------  ------  -  ----  ----  ----  ---  --------  -----  -------------  ---  ----------  -  ---------
ENE_Trechnites_sp_D0573_xy                          ---  -----  ---  ---  -  -----  -  -----------  -  --------  -------------  --  ---------------  -------  -----------  ------  ---  ------  --------------------  ------  ----  ----  ---------------  -----  ----------------  ---------  ----------  ----  ----------  ---- -----    --------------  -------------  ------  --------------  ------------------  -----  -----------  ---------  ------  --------  ---  -----------------  ----------------------  -------  --------------------  --- --------  ----  -----------  ---    -    ------  ----------  ------  -  ----  ----  ----  ---  --------  -----  -------------  ---  ----------  -  ---------
ENT_Anagyrus_nr_pseudococci_D0581_xy                ---  -----  ---  ---  -  -----  -  -----------  -  --------  -------------  --  ---------------  -------  -----------  ------  ---  ------  --------------------  ------  ----  ----  ---------------  -----  ----------------  ---------  ----------  ----  ----------  ---- -----    --------------  -------------  ------  --------------  ------------------  -----  -----------  ---------  ------  --------  ---  -----------------  ----------------------  -------  --------------------  --- --------  ----  -----------  ---    -    ------  ----------  ------  -  ----  ----  ----  ---  --------  -----  -------------  ---  ----------  -  ---------
ENT_Anagyrus_sp_D1030_uxyz                          ---  -----  ---  ---  -  -----  -  -----------  -  --------  -------------  --  ---------------  -------  -----------  ------  ---  ------  --------------------  ------  ----  ----  ---------------  -----  ----------------  ---------  ----------  ----  ----------  ---- -----    --------------  -------------  ------  --------------  ------------------  -----  -----------  ---------  ------  --------  ---  -----------------  ----------------------  -------  --------------------  --- --------  ----  -----------  ---    -    ------  ----------  ------  -  ----  ----  ----  ---  --------  -----  -------------  ---  ----------  -  ---------
ENT_Leptomastidea_sp_D1029_uvxyz                    ---  -----  ---  ---  -  -----  -  -----------  -  --------  -------------  --  ---------------  -------  -----------  ------  ---  ------  --------------------  ------  ----  ----  ---------------  -----  ----------------  ---------  ----------  ----  ----------  ---- -----    --------------  -------------  ------  --------------  ------------------  -----  -----------  ---------  ------  --------  ---  -----------------  ----------------------  -------  --------------------  --- --------  ----  -----------  ---    -    ------  ----------  ------  -  ----  ----  ----  ---  --------  -----  -------------  ---  ----------  -  ---------
ENT_Neodusmetia_sangwani_D0558_uxy                  ---  -----  ---  ---  -  -----  -  -----------  -  --------  -------------  --  ---------------  -------  -----------  ------  ---  ------  --------------------  ------  ----  ----  ---------------  -----  ----------------  ---------  ----------  ----  ----------  ---- -----    --------------  -------------  ------  --------------  ------------------  -----  -----------  ---------  ------  --------  ---  -----------------  ----------------------  -------  --------------------  --- --------  ----  -----------  ---    -    ------  ----------  ------  -  ----  ----  ----  ---  --------  -----  -------------  ---  ----------  -  ---------
ENT_Savzdargia_sp_D2657_xyz                         ---  -----  ---  ---  -  -----  -  -----------  -  --------  -------------  --  ---------------  -------  -----------  ------  ---  ------  --------------------  ------  ----  ----  ---------------  -----  ----------------  ---------  ----------  ----  ----------  ---- -----    --------------  -------------  ------  --------------  ------------------  -----  -----------  ---------  ------  --------  ---  -----------------  ----------------------  -------  --------------------  --- --------  ----  -----------  ---    -    ------  ----------  ------  -  ----  ----  ----  ---  --------  -----  -------------  ---  ----------  -  ---------
EPC_Balcha_sp_D1790_uxyz                            ---  -----  ---  ---  -  -----  -  -----------  -  --------  -------------  --  ---------------  -------  -----------  ------  ---  ------  --------------------  ------  ----  ----  ---------------  -----  ----------------  ---------  ----------  ----  ----------  ---- -----    --------------  -------------  ------  --------------  ------------------  -----  -----------  ---------  ------  --------  ---  -----------------  ----------------------  -------  --------------------  --- --------  ----  -----------  ---    -    ------  ----------  ------  -  ----  ----  ----  ---  --------  -----  -------------  ---  ----------  -  ---------
EPC_Calosota_sp_D2069_tuxyz                         TAC  CTGGT  TGA  TCC  T  GCCAG  T  AGTCATATGCT  T  GTCTCAAA  GATTAAGCCATGC  AT  GTCTCAGTGCATGCC  GAATTAA  GGTGAAACCGC  GAATGG  CTC  ATTAAA  TCAGTTATGGTTCCTTAGAT  CGTACC  CACA  TTTA  CTTGGATAACTGTGG  TAATT  CTAGAGCTAATACATG  CAAACCAGA  GTTCCGACCA  GAGA  TGGAAGGAAC  GCTT TTATT    AGATCAAAACCAAT  CGGTGG-CGGGC-  t---tc  -GCTTGT-CCACCG  TTTACCTTGGTGACTCTG  AATAA  CTTTGTGCTGA  TCGCAGGGT  CTA-GC  ACCGGCGA  CGC  ATCTTTCAAATGTCTGC  CTTATCAACTGTCGATGGTAGG  TTCTGCG  CCTACCATGGTTGTAACGGG  TAA CGGGGAAT  CAGG  GTTCGATTCCG  GAG    A    GGGAGC  CTGAGAAACG  GCTACC  A  CATC  CAAG  GAAG  GCA  GCAGGCGC  GCAAA  TTACCCACTCCCG  GCA  CGGGGAGGTA  G  TGACGAAAA
EPC_Eusandalum_sp1_D1521_uxyz                       ---  -----  ---  ---  -  -----  -  -----------  -  --------  -------------  --  ---------------  -------  -----------  ------  ---  ------  --------------------  ------  ----  ----  ---------------  -----  ----------------  ---------  ----------  ----  ----------  ---- -----    --------------  -------------  ------  --------------  ------------------  -----  -----------  ---------  ------  --------  ---  -----------------  ----------------------  -------  --------------------  --- --------  ----  -----------  ---    -    ------  ----------  ------  -  ----  ----  ----  ---  --------  -----  -------------  ---  ----------  -  ---------
EPC_Eusandalum_sp2_D2665_xyz                        ---  -----  ---  ---  -  -----  -  -----------  -  --------  -------------  --  ---------------  -------  -----------  ------  ---  ------  --------------------  ------  ----  ----  ---------------  -----  ----------------  ---------  ----------  ----  ----------  ---- -----    --------------  -------------  ------  --------------  ------------------  -----  -----------  ---------  ------  --------  ---  -----------------  ----------------------  -------  --------------------  --- --------  ----  -----------  ---    -    ------  ----------  ------  -  ----  ----  ----  ---  --------  -----  -------------  ---  ----------  -  ---------
EPC_Eusandalum_sp3_D2666_xyz                        ---  -----  ---  ---  -  -----  -  -----------  -  --------  -------------  --  ---------------  -------  -----------  ------  ---  ------  --------------------  ------  ----  ----  ---------------  -----  ----------------  ---------  ----------  ----  ----------  ---- -----    --------------  -------------  ------  --------------  ------------------  -----  -----------  ---------  ------  --------  ---  -----------------  ----------------------  -------  --------------------  --- --------  ----  -----------  ---    -    ------  ----------  ------  -  ----  ----  ----  ---  --------  -----  -------------  ---  ----------  -  ---------
EPC_Licrooides_umbilicatus_D1968_uvxyz              ---  -----  ---  ---  -  -----  -  -----------  -  --------  -------------  --  ---------------  -------  -----------  ------  ---  ------  --------------------  ------  ----  ----  ---------------  -----  ----------------  ---------  ----------  ----  ----------  ---- -----    --------------  -------------  ------  --------------  ------------------  -----  -----------  ---------  ------  --------  ---  -----------------  ----------------------  -------  --------------------  --- --------  ----  -----------  ---    -    ------  ----------  ------  -  ----  ----  ----  ---  --------  -----  -------------  ---  ----------  -  ---------
EPE_Anastatus_sp_D2271_vxyz                         ---  -----  ---  ---  -  -----  -  -----------  -  --------  -------------  --  ---------------  -------  -----------  ------  ---  ------  --------------------  ------  ----  ----  ---------------  -----  ----------------  ---------  ----------  ----  ----------  ---- -----    --------------  -------------  ------  --------------  ------------------  -----  -----------  ---------  ------  --------  ---  -----------------  ----------------------  -------  --------------------  --- --------  ----  -----------  ---    -    ------  ----------  ------  -  ----  ----  ----  ---  --------  -----  -------------  ---  ----------  -  ---------
EPE_Arachnophaga_eucnemia_D1991_uvxyz               ---  -----  ---  ---  -  -----  -  -----------  -  --------  -------------  --  ---------------  -------  -----------  ------  ---  ------  --------------------  ------  ----  ----  ---------------  -----  ----------------  ---------  ----------  ----  ----------  ---- -----    --------------  -------------  ------  --------------  ------------------  -----  -----------  ---------  ------  --------  ---  -----------------  ----------------------  -------  --------------------  --- --------  ----  -----------  ---    -    ------  ----------  ------  -  ----  ----  ----  ---  --------  -----  -------------  ---  ----------  -  ---------
EPC_Archaeopelma_tropeotergum_D2753_xyz             ---  -----  ---  ---  -  -----  -  -----------  -  --------  -------------  --  ---------------  -------  -----------  ------  ---  ------  --------------------  ------  ----  ----  ---------------  -----  ----------------  ---------  ----------  ----  ----------  ---- -----    --------------  -------------  ------  --------------  ------------------  -----  -----------  ---------  ------  --------  ---  -----------------  ----------------------  -------  --------------------  --- --------  ----  -----------  ---    -    ------  ----------  ------  -  ----  ----  ----  ---  --------  -----  -------------  ---  ----------  -  ---------
EPE_Brasema_sp_D1351_uxyz                           ---  -----  ---  ---  -  -----  -  -----------  -  --------  -------------  --  ---------------  -------  -----------  ------  ---  ------  --------------------  ------  ----  ----  ---------------  -----  ----------------  ---------  ----------  ----  ----------  ---- -----    --------------  -------------  ------  --------------  ------------------  -----  -----------  ---------  ------  --------  ---  -----------------  ----------------------  -------  --------------------  --- --------  ----  -----------  ---    -    ------  ----------  ------  -  ----  ----  ----  ---  --------  -----  -------------  ---  ----------  -  ---------
EPE_Eupelmus_Episolindelia_sp_D2440_uxyz            ---  -----  ---  ---  -  -----  -  -----------  -  --------  -------------  --  ---------------  -------  -----------  ------  ---  ------  --------------------  ------  ----  ----  ---------------  -----  ----------------  ---------  ----------  ----  ----------  ---- -----    --------------  -------------  ------  --------------  ------------------  -----  -----------  ---------  ------  --------  ---  -----------------  ----------------------  -------  --------------------  --- --------  ----  -----------  ---    -    ------  ----------  ------  -  ----  ----  ----  ---  --------  -----  -------------  ---  ----------  -  ---------
EPE_Eupelmus_falcata_R1317_17_uxyz                  ---  -----  ---  ---  -  -----  -  -----------  -  --------  -------------  --  ---------------  -------  -----------  ------  ---  ------  --------------------  ------  ----  ----  ---------------  -----  ----------------  ---------  ----------  ----  ----------  ---- -----    --------------  -------------  ------  --------------  ------------------  -----  -----------  ---------  ------  --------  ---  -----------------  ----------------------  -------  --------------------  --- --------  ----  -----------  ---    -    ------  ----------  ------  -  ----  ----  ----  ---  --------  -----  -------------  ---  ----------  -  ---------
EPE_Eupelmus_sp_D1358_tuvxyz                        TAC  CTGGT  TGA  TCC  T  GCCAG  T  AGTCATATGCT  T  GTCTCAAA  GATTAAGCCATGC  AT  GTCTCAGTGCATGCC  GAATTAA  GGTGAAACCGC  GAATGG  CTC  ATTAAA  TCAGTTATGGTTCCTTAGAT  CGTACC  CACA  TTTA  CTTGGATAACTGTGG  TAATT  CTAGAGCTAATACATG  CAAACCAGA  GTTCCGACCA  GAGA  TGGAAGGAAC  GCTT TTATT    AGATCAAAACCAAT  CGGTGG-CGGG--  tt--cg  --CTCGT-CCACCG  TTTACCTTGGTGACTCTG  AATAA  CTTTGTGCTGA  TCGCACGGT  CTC-GC  ACCGGCGA  CGC  ATCTTTCAAATGTCTGC  CTTATCAACTGTCGATGGTAGG  TTCTGCG  CCTACCATGGTTGTAACGGG  TAA CGGGGAAT  CAGG  GTTCGATTCCG  GAG    A    GGGAGC  CTGAGAAACG  GCTACC  A  CATC  CAAG  GAAG  GCA  GCAGGCGC  GCAAA  TTACCCACTCCCG  GCA  CGGGGAGGTA  G  TGACGAAAA
EPE_Mesocomys_vuiletti_D2320_uvxyz                  ---  -----  ---  ---  -  -----  -  -----------  -  --------  -------------  --  ---------------  -------  -----------  ------  ---  ------  --------------------  ------  ----  ----  ---------------  -----  ----------------  ---------  ----------  ----  ----------  ---- -----    --------------  -------------  ------  --------------  ------------------  -----  -----------  ---------  ------  --------  ---  -----------------  ----------------------  -------  --------------------  --- --------  ----  -----------  ---    -    ------  ----------  ------  -  ----  ----  ----  ---  --------  -----  -------------  ---  ----------  -  ---------
EPE_Paranastatus_nigriscutellatus_D2322_uxyz        ---  -----  ---  ---  -  -----  -  -----------  -  --------  -------------  --  ---------------  -------  -----------  ------  ---  ------  --------------------  ------  ----  ----  ---------------  -----  ----------------  ---------  ----------  ----  ----------  ---- -----    --------------  -------------  ------  --------------  ------------------  -----  -----------  ---------  ------  --------  ---  -----------------  ----------------------  -------  --------------------  --- --------  ----  -----------  ---    -    ------  ----------  ------  -  ----  ----  ----  ---  --------  -----  -------------  ---  ----------  -  ---------
EPE_Phlebopenes_sp_D2225_uvxyz                      ---  -----  ---  ---  -  -----  -  -----------  -  --------  -------------  --  ---------------  -------  -----------  ------  ---  ------  --------------------  ------  ----  ----  ---------------  -----  ----------------  ---------  ----------  ----  ----------  ---- -----    --------------  -------------  ------  --------------  ------------------  -----  -----------  ---------  ------  --------  ---  -----------------  ----------------------  -------  --------------------  --- --------  ----  -----------  ---    -    ------  ----------  ------  -  ----  ----  ----  ---  --------  -----  -------------  ---  ----------  -  ---------
EPE_Reikosiella_sp_D1960_uxyz                       ---  -----  ---  ---  -  -----  -  -----------  -  --------  -------------  --  ---------------  -------  -----------  ------  ---  ------  --------------------  ------  ----  ----  ---------------  -----  ----------------  ---------  ----------  ----  ----------  ---- -----    --------------  -------------  ------  --------------  ------------------  -----  -----------  ---------  ------  --------  ---  -----------------  ----------------------  -------  --------------------  --- --------  ----  -----------  ---    -    ------  ----------  ------  -  ----  ----  ----  ---  --------  -----  -------------  ---  ----------  -  ---------
EPE_Tineobius_sp_D1962_uxyz                         ---  -----  ---  ---  -  -----  -  -----------  -  --------  -------------  --  ---------------  -------  -----------  ------  ---  ------  --------------------  ------  ----  ----  ---------------  -----  ----------------  ---------  ----------  ----  ----------  ---- -----    --------------  -------------  ------  --------------  ------------------  -----  -----------  ---------  ------  --------  ---  -----------------  ----------------------  -------  --------------------  --- --------  ----  -----------  ---    -    ------  ----------  ------  -  ----  ----  ----  ---  --------  -----  -------------  ---  ----------  -  ---------
EPE_Uropelma_formosum_D2323_uvxyz                   ---  -----  ---  ---  -  -----  -  -----------  -  --------  -------------  --  ---------------  -------  -----------  ------  ---  ------  --------------------  ------  ----  ----  ---------------  -----  ----------------  ---------  ----------  ----  ----------  ---- -----    --------------  -------------  ------  --------------  ------------------  -----  -----------  ---------  ------  --------  ---  -----------------  ----------------------  -------  --------------------  --- --------  ----  -----------  ---    -    ------  ----------  ------  -  ----  ----  ----  ---  --------  -----  -------------  ---  ----------  -  ---------
EPE_Xenanastatus_sp_D2074_tuvxyz                    TAC  CTGGT  TGA  TCC  T  GCCAG  T  AGTCATATGCT  T  GTCTCAAA  GATTAAGCCATGC  AT  GTCTCAGTGCATGCC  GAATTAA  GGTGAAACCGC  GAATGG  CTC  ATTAAA  TCAGTTATGGTTCCTTAGAT  CGTACC  CACA  TTTA  CTTGGATAACTGTGG  TAATT  CTAGAGCTAATACATG  CAAACCAGA  GTTCCGACCA  GAGA  TGGAAGGAAC  GCTT TTATT    AGATCAAAACCAAT  CGGCGG-CGGGC-  t---tt  -GCTCGT-CCACCG  TTTACCTTGGTGATTCTG  AATAA  CTTTGTGCTGA  TCGCACGGT  CTC-GC  ACCGGCGA  CGC  ATCTTTCAAATGTCTGC  CTTATCAACTGTCGATGGTAGG  TTCTGCG  CCTACCATGGTTGTAACGGG  TAA CGGGGAAT  CAGG  GTTCGATTCCG  GAG    A    GGGAGC  CTGAGAAACG  GCTACC  A  CATC  CAAG  GAAG  GCA  GCAGGCGC  GCAAA  TTACCCACTCCCG  GCA  CGGGGAGGTA  G  TGACGAAAA
EPE_Zaischnopsis_sp_D2319_uvxyz                     ---  -----  ---  ---  -  -----  -  -----------  -  --------  -------------  --  ---------------  -------  -----------  ------  ---  ------  --------------------  ------  ----  ----  ---------------  -----  ----------------  ---------  ----------  ----  ----------  ---- -----    --------------  -------------  ------  --------------  ------------------  -----  -----------  ---------  ------  --------  ---  -----------------  ----------------------  -------  --------------------  --- --------  ----  -----------  ---    -    ------  ----------  ------  -  ----  ----  ----  ---  --------  -----  -------------  ---  ----------  -  ---------
EPN_Metapelma_sp1_D2185_D2526_uvxyz                 ---  -----  ---  ---  -  -----  -  -----------  -  --------  -------------  --  ---------------  -------  -----------  ------  ---  ------  --------------------  ------  ----  ----  ---------------  -----  ----------------  ---------  ----------  ----  ----------  ---- -----    --------------  -------------  ------  --------------  ------------------  -----  -----------  ---------  ------  --------  ---  -----------------  ----------------------  -------  --------------------  --- --------  ----  -----------  ---    -    ------  ----------  ------  -  ----  ----  ----  ---  --------  -----  -------------  ---  ----------  -  ---------
EPN_Metapelma_sp2_D2667_tvxyz                       TAC  CTGGT  TGA  TCC  T  GCCAG  T  AGTCATATGCT  T  GTCTCAAA  GATTAAGCCATGC  AT  GTCTCAGTGCATGCC  GAATTAA  GGTGAAACCGC  GAATGG  CTC  ATTAAA  TCAGTTATGGTTCCTTAGAT  CGTACC  CACA  TTTA  CTTGGATAACTGTGG  TAATT  CTAGAGCTAATACATG  CAAACCAGA  GTTCCGACCA  GAGA  TGGAAGGAAC  GCTT TTATT    AGATCAAAACCAAT  CGGTGG-CGGGT-  at--cc  -GCTCGT-CCACCG  TTTACCTTGGTGACTCTG  AATAA  CTTTGAGCTGA  TCGCACGGT  CTA-GC  ACCGGCGA  CGC  ATCTTTCAAATGTCTGC  CTTATCAACTGTCGATGGTAGG  TTCTGCG  CCTACCATGGTTGTAACGGG  TAA CGGGGAAT  CAGG  GTTCGATTCCG  GAG    A    GGGAGC  CTGAGAAACG  GCTACC  A  CATC  CAAG  GAAG  GCA  GCAGGCGC  GCAAA  TTACCCACTCCCG  GCA  CGGGGAGGTA  G  TGACGAAAA
EPN_Neanastatus_sp1_D2300_tuvxyz                    TAC  CTGGT  TGA  TCC  T  GCCAG  T  AGTCATATGCT  T  GTCTCAAA  GATTAAGCCATGC  AT  GTCTCAGTGCATGCC  GAATTAA  GGTGAAACCGC  GAATGG  CTC  ATTAAA  TCAGTTATGGTTCCTTAGAT  CGTACC  CACA  TTTA  CTTGGATAACTGTGG  TAATT  CTAGAGCTAATACATG  CAAACCAGA  GTTCCGACCA  GAGA  TGGAAGGAAC  GCTT TTATT    AGATCAAAACCAAT  CGGTGG-CGGGC-  tcaccc  -GCCCGT-CCACCG  TTTACCTTGGTGACTCTG  AATAA  CTTTGTGCTGA  TCGCACGGT  CCC-GA  ACCGGCGA  CGC  ATCTTTCAAATGTCTGC  CTTATCAACTGTCGATGGTAGG  TTCTGCG  CCTACCATGGTTGTAACGGG  TAA CGGGGAAT  CAGG  GTTCGATTCCG  GAG    A    GGGAGC  CTGAGAAACG  GCTACC  A  CATC  CAAG  GAAG  GCA  GCAGGCGC  GCAAA  TTACCCACTCCCG  GCA  CGGGGAGGTA  G  TGACGAAAA
EPN_Neanastatus_sp2_D2301_uvxyz                     ---  -----  ---  ---  -  -----  -  -----------  -  --------  -------------  --  ---------------  -------  -----------  ------  ---  ------  --------------------  ------  ----  ----  ---------------  -----  ----------------  ---------  ----------  ----  ----------  ---- -----    --------------  -------------  ------  --------------  ------------------  -----  -----------  ---------  ------  --------  ---  -----------------  ----------------------  -------  --------------------  --- --------  ----  -----------  ---    -    ------  ----------  ------  -  ----  ----  ----  ---  --------  -----  -------------  ---  ----------  -  ---------
EUE_Ancylotropus_cariniscutis_D0407_uvxyz           ---  -----  ---  ---  -  -----  -  -----------  -  --------  -------------  --  ---------------  -------  -----------  ------  ---  ------  --------------------  ------  ----  ----  ---------------  -----  ----------------  ---------  ----------  ----  ----------  ---- -----    --------------  -------------  ------  --------------  ------------------  -----  -----------  ---------  ------  --------  ---  -----------------  ----------------------  -------  --------------------  --- --------  ----  -----------  ---    -    ------  ----------  ------  -  ----  ----  ----  ---  --------  -----  -------------  ---  ----------  -  ---------
EUE_Ancylotropus_montanus_D2747_uxyz                ---  -----  ---  ---  -  -----  -  -----------  -  --------  -------------  --  ---------------  -------  -----------  ------  ---  ------  --------------------  ------  ----  ----  ---------------  -----  ----------------  ---------  ----------  ----  ----------  ---- -----    --------------  -------------  ------  --------------  ------------------  -----  -----------  ---------  ------  --------  ---  -----------------  ----------------------  -------  --------------------  --- --------  ----  -----------  ---    -    ------  ----------  ------  -  ----  ----  ----  ---  --------  -----  -------------  ---  ----------  -  ---------
EUE_Colocharis_napoana_D0378_uxy                    ---  -----  ---  ---  -  -----  -  -----------  -  --------  -------------  --  ---------------  -------  -----------  ------  ---  ------  --------------------  ------  ----  ----  ---------------  -----  ----------------  ---------  ----------  ----  ----------  ---- -----    --------------  -------------  ------  --------------  ------------------  -----  -----------  ---------  ------  --------  ---  -----------------  ----------------------  -------  --------------------  --- --------  ----  -----------  ---    -    ------  ----------  ------  -  ----  ----  ----  ---  --------  -----  -------------  ---  ----------  -  ---------
EUE_Eucharis_adscendens_D0486_xy                    ---  -----  ---  ---  -  -----  -  -----------  -  --------  -------------  --  ---------------  -------  -----------  ------  ---  ------  --------------------  ------  ----  ----  ---------------  -----  ----------------  ---------  ----------  ----  ----------  ---- -----    --------------  -------------  ------  --------------  ------------------  -----  -----------  ---------  ------  --------  ---  -----------------  ----------------------  -------  --------------------  --- --------  ----  -----------  ---    -    ------  ----------  ------  -  ----  ----  ----  ---  --------  -----  -------------  ---  ----------  -  ---------
EUE_Eucharis_albipennis_D0729_uvxyz                 ---  -----  ---  ---  -  -----  -  -----------  -  --------  -------------  --  ---------------  -------  -----------  ------  ---  ------  --------------------  ------  ----  ----  ---------------  -----  ----------------  ---------  ----------  ----  ----------  ---- -----    --------------  -------------  ------  --------------  ------------------  -----  -----------  ---------  ------  --------  ---  -----------------  ----------------------  -------  --------------------  --- --------  ----  -----------  ---    -    ------  ----------  ------  -  ----  ----  ----  ---  --------  -----  -------------  ---  ----------  -  ---------
EUE_Eucharis_nr_adscendens_D0337_xy                 ---  -----  ---  ---  -  -----  -  -----------  -  --------  -------------  --  ---------------  -------  -----------  ------  ---  ------  --------------------  ------  ----  ----  ---------------  -----  ----------------  ---------  ----------  ----  ----------  ---- -----    --------------  -------------  ------  --------------  ------------------  -----  -----------  ---------  ------  --------  ---  -----------------  ----------------------  -------  --------------------  --- --------  ----  -----------  ---    -    ------  ----------  ------  -  ----  ----  ----  ---  --------  -----  -------------  ---  ----------  -  ---------
EUE_Eucharis_sp_D1843_uxy                           ---  -----  ---  ---  -  -----  -  -----------  -  --------  -------------  --  ---------------  -------  -----------  ------  ---  ------  --------------------  ------  ----  ----  ---------------  -----  ----------------  ---------  ----------  ----  ----------  ---- -----    --------------  -------------  ------  --------------  ------------------  -----  -----------  ---------  ------  --------  ---  -----------------  ----------------------  -------  --------------------  --- --------  ----  -----------  ---    -    ------  ----------  ------  -  ----  ----  ----  ---  --------  -----  -------------  ---  ----------  -  ---------
EUE_Eucharissa_natalica_D0485_xy                    ---  -----  ---  ---  -  -----  -  -----------  -  --------  -------------  --  ---------------  -------  -----------  ------  ---  ------  --------------------  ------  ----  ----  ---------------  -----  ----------------  ---------  ----------  ----  ----------  ---- -----    --------------  -------------  ------  --------------  ------------------  -----  -----------  ---------  ------  --------  ---  -----------------  ----------------------  -------  --------------------  --- --------  ----  -----------  ---    -    ------  ----------  ------  -  ----  ----  ----  ---  --------  -----  -------------  ---  ----------  -  ---------
EUE_Galearia_bruchi_D2522_vxyz                      ---  -----  ---  ---  -  -----  -  -----------  -  --------  -------------  --  ---------------  -------  -----------  ------  ---  ------  --------------------  ------  ----  ----  ---------------  -----  ----------------  ---------  ----------  ----  ----------  ---- -----    --------------  -------------  ------  --------------  ------------------  -----  -----------  ---------  ------  --------  ---  -----------------  ----------------------  -------  --------------------  --- --------  ----  -----------  ---    -    ------  ----------  ------  -  ----  ----  ----  ---  --------  -----  -------------  ---  ----------  -  ---------
EUE_Kapala_floridana_D0432_uxy                      ---  -----  ---  ---  -  -----  -  -----------  -  --------  -------------  --  ---------------  -------  -----------  ------  ---  ------  --------------------  ------  ----  ----  ---------------  -----  ----------------  ---------  ----------  ----  ----------  ---- -----    --------------  -------------  ------  --------------  ------------------  -----  -----------  ---------  ------  --------  ---  -----------------  ----------------------  -------  --------------------  --- --------  ----  -----------  ---    -    ------  ----------  ------  -  ----  ----  ----  ---  --------  -----  -------------  ---  ----------  -  ---------
EUE_Lophyrocera_pretendens_D0634_uvxyz              ---  -----  ---  ---  -  -----  -  -----------  -  --------  -------------  --  ---------------  -------  -----------  ------  ---  ------  --------------------  ------  ----  ----  ---------------  -----  ----------------  ---------  ----------  ----  ----------  ---- -----    --------------  -------------  ------  --------------  ------------------  -----  -----------  ---------  ------  --------  ---  -----------------  ----------------------  -------  --------------------  --- --------  ----  -----------  ---    -    ------  ----------  ------  -  ----  ----  ----  ---  --------  -----  -------------  ---  ----------  -  ---------
EUE_Lophyrocera_variabilis_D2325_vxyz               ---  -----  ---  ---  -  -----  -  -----------  -  --------  -------------  --  ---------------  -------  -----------  ------  ---  ------  --------------------  ------  ----  ----  ---------------  -----  ----------------  ---------  ----------  ----  ----------  ---- -----    --------------  -------------  ------  --------------  ------------------  -----  -----------  ---------  ------  --------  ---  -----------------  ----------------------  -------  --------------------  --- --------  ----  -----------  ---    -    ------  ----------  ------  -  ----  ----  ----  ---  --------  -----  -------------  ---  ----------  -  ---------
EUE_Neolosbanus_palgravei_D0406_uvxyz               ---  -----  ---  ---  -  -----  -  -----------  -  --------  -------------  --  ---------------  -------  -----------  ------  ---  ------  --------------------  ------  ----  ----  ---------------  -----  ----------------  ---------  ----------  ----  ----------  ---- -----    --------------  -------------  ------  --------------  ------------------  -----  -----------  ---------  ------  --------  ---  -----------------  ----------------------  -------  --------------------  --- --------  ----  -----------  ---    -    ------  ----------  ------  -  ----  ----  ----  ---  --------  -----  -------------  ---  ----------  -  ---------
EUE_Neolosbanus_purpureoventris_D0414_uvxyz         ---  -----  ---  ---  -  -----  -  -----------  -  --------  -------------  --  ---------------  -------  -----------  ------  ---  ------  --------------------  ------  ----  ----  ---------------  -----  ----------------  ---------  ----------  ----  ----------  ---- -----    --------------  -------------  ------  --------------  ------------------  -----  -----------  ---------  ------  --------  ---  -----------------  ----------------------  -------  --------------------  --- --------  ----  -----------  ---    -    ------  ----------  ------  -  ----  ----  ----  ---  --------  -----  -------------  ---  ----------  -  ---------
EUE_Neostilbula_ranomafanae_D1446_tuxyz             ---  -----  ---  ---  -  -----  -  -----------  -  --------  -------------  --  ---------------  -------  -----------  ------  ---  ------  ------------CCTTAGAT  CGTACC  CACA  TTTA  CTTGGATAACTGTGG  TAATT  CTAGAGCTAATACATG  CAAACCAGA  GCTCCGACCA  GAGA  TGGAAGGAAC  GCTT TTATT    AGATCAAAACCAAT  CGGTGG-CGAG--  ttt-cc  --CTCGT-CCATCG  TTAGCCTTGGTGACTCTG  AATAA  CTTTGTGCTGA  TCGCACGGT  CTC-GT  ACCGGCGA  CGC  ATCTTTCAAATGTCTGC  CTTATCAACTGTCGATGGTAGG  TTTTGCG  CCTACCATGGTTGTAACGGG  TAA CGGGGAAT  CAGG  GTTCGATTCCG  GAG    A    GGGAGC  CTGAGAAACG  GCTACC  A  CATC  CAAG  GAAG  GCA  GCAGGCGC  GCAAA  TTACCCACTCCCG  GCA  CGGGGAGGTA  G  TGACGAAAA
EUE_Obeza_sp_D2493_uvxyz                            ---  -----  ---  ---  -  -----  -  -----------  -  --------  -------------  --  ---------------  -------  -----------  ------  ---  ------  --------------------  ------  ----  ----  ---------------  -----  ----------------  ---------  ----------  ----  ----------  ---- -----    --------------  -------------  ------  --------------  ------------------  -----  -----------  ---------  ------  --------  ---  -----------------  ----------------------  -------  --------------------  --- --------  ----  -----------  ---    -    ------  ----------  ------  -  ----  ----  ----  ---  --------  -----  -------------  ---  ----------  -  ---------
EUE_Pseudochalcura_prolata_D2494_xyz                ---  -----  ---  ---  -  -----  -  -----------  -  --------  -------------  --  ---------------  -------  -----------  ------  ---  ------  --------------------  ------  ----  ----  ---------------  -----  ----------------  ---------  ----------  ----  ----------  ---- -----    --------------  -------------  ------  --------------  ------------------  -----  -----------  ---------  ------  --------  ---  -----------------  ----------------------  -------  --------------------  --- --------  ----  -----------  ---    -    ------  ----------  ------  -  ----  ----  ----  ---  --------  -----  -------------  ---  ----------  -  ---------
EUE_Pseudometagea_bakeri_D0322_uvxyz                ---  -----  ---  ---  -  -----  -  -----------  -  --------  -------------  --  ---------------  -------  -----------  ------  ---  ------  --------------------  ------  ----  ----  ---------------  -----  ----------------  ---------  ----------  ----  ----------  ---- -----    --------------  -------------  ------  --------------  ------------------  -----  -----------  ---------  ------  --------  ---  -----------------  ----------------------  -------  --------------------  --- --------  ----  -----------  ---    -    ------  ----------  ------  -  ----  ----  ----  ---  --------  -----  -------------  ---  ----------  -  ---------
EUE_Pseudometagea_montana_D0321_uvxy                ---  -----  ---  ---  -  -----  -  -----------  -  --------  -------------  --  ---------------  -------  -----------  ------  ---  ------  --------------------  ------  ----  ----  ---------------  -----  ----------------  ---------  ----------  ----  ----------  ---- -----    --------------  -------------  ------  --------------  ------------------  -----  -----------  ---------  ------  --------  ---  -----------------  ----------------------  -------  --------------------  --- --------  ----  -----------  ---    -    ------  ----------  ------  -  ----  ----  ----  ---  --------  -----  -------------  ---  ----------  -  ---------
EUE_Pseudometagea_schwarzii_D0274b_uvxy             ---  -----  ---  ---  -  -----  -  -----------  -  --------  -------------  --  ---------------  -------  -----------  ------  ---  ------  --------------------  ------  ----  ----  ---------------  -----  ----------------  ---------  ----------  ----  ----------  ---- -----    --------------  -------------  ------  --------------  ------------------  -----  -----------  ---------  ------  --------  ---  -----------------  ----------------------  -------  --------------------  --- --------  ----  -----------  ---    -    ------  ----------  ------  -  ----  ----  ----  ---  --------  -----  -------------  ---  ----------  -  ---------
EUE_Psilocharis_afra_D0156_uxyz                     ---  -----  ---  ---  -  -----  -  -----------  -  --------  -------------  --  ---------------  -------  -----------  ------  ---  ------  --------------------  ------  ----  ----  ---------------  -----  ----------------  ---------  ----------  ----  ----------  ---- -----    --------------  -------------  ------  --------------  ------------------  -----  -----------  ---------  ------  --------  ---  -----------------  ----------------------  -------  --------------------  --- --------  ----  -----------  ---    -    ------  ----------  ------  -  ----  ----  ----  ---  --------  -----  -------------  ---  ----------  -  ---------
EUE_Psilocharis_afra_D2273_tuvxyz                   TAC  CTGGT  TGA  TCC  T  GCCAG  T  AGTCATATGCT  T  GTCTCAAA  GATTAAGCCATGC  AT  GTCTCAGTGCATGCC  GAATTAA  GGTGAAACCGC  GAATGG  CTC  ATTAAA  TCAGTTATGGTTCCTTAGAT  CGTACC  CACA  TTTA  CTTGGATAACTGTGG  TAATT  CTAGAGCTAATACATG  CAAACCAGA  GCTCCGACCA  GAGA  TGGGAGGAGC  GCTT TTATT    AGATCAAAACCAAT  CGGTGG-CGAG--  ttt-cc  --CTCGT-CCATCG  TTAGCCTTGGTGACTCTG  AATAA  CTTTGTGCTGA  TCGCACGGT  CTC-GT  ACCGGCGA  CGC  ATCTTTCAAATGTCTGC  CTTATCAACTGTCGATGGTAGG  TTTTGCG  CCTACCATGGTTGTAACGGG  TAA CGGGGAAT  CAGG  GTTCGATTCCG  GAG    A    GGGAGC  CTGAGAAACG  GCTACC  A  CATC  CAAG  GAAG  GCA  GCAGGCGC  GCAAA  TTACCCACTCCCG  GCA  CGGGGAGGTA  G  TGACGAAAA
EUE_Psilocharis_pacifica_D1259_uvxyz                ---  -----  ---  ---  -  -----  -  -----------  -  --------  -------------  --  ---------------  -------  -----------  ------  ---  ------  --------------------  ------  ----  ----  ---------------  -----  ----------------  ---------  ----------  ----  ----------  ---- -----    --------------  -------------  ------  --------------  ------------------  -----  -----------  ---------  ------  --------  ---  -----------------  ----------------------  -------  --------------------  --- --------  ----  -----------  ---    -    ------  ----------  ------  -  ----  ----  ----  ---  --------  -----  -------------  ---  ----------  -  ---------
EUE_Psilocharis_theocles_D0170b_uxy                 ---  -----  ---  ---  -  -----  -  -----------  -  --------  -------------  --  ---------------  -------  -----------  ------  ---  ------  --------------------  ------  ----  ----  ---------------  -----  ----------------  ---------  ----------  ----  ----------  ---- -----    --------------  -------------  ------  --------------  ------------------  -----  -----------  ---------  ------  --------  ---  -----------------  ----------------------  -------  --------------------  --- --------  ----  -----------  ---    -    ------  ----------  ------  -  ----  ----  ----  ---  --------  -----  -------------  ---  ----------  -  ---------
EUE_Saccharissa_alcocki_D2032_tuvxyz                TAC  CTGGT  TGA  TCC  T  GCCAG  T  AGTCATATGCT  T  GTCTCAAA  GATTAAGCCATGC  AT  GTCTCAGTGCATGCC  GAATTAA  GGTGAAACCGC  GAATGG  CTC  ATTAAA  TCAGTTATGGTTCCTTAGAT  CGTACC  CACA  TTTA  CTTGGATAACTGTGG  TAATT  CTAGAGCTAATACATG  CAAACCAGA  GCTCCGACCA  GAGA  TGGAAGGAAC  GCTT TTATT    AGATCAAAACCAAT  CGGTGG-CGGG--  ttt-ac  --CTCGT-CCATCG  TTAGCCTTGGTGACTCTG  AATAA  CTTTGTGCTGA  TCGCACGGT  CTC-GT  ACCGGCGA  CGC  ATCTTTCAAATGTCTGC  CTTATCAACTGTCGATGGTAGG  TTTTGCG  CCTACCATGGTTGTAACGGG  TAA CGGGGAAT  CAGG  GTTCGATTCCG  GAG    A    GGGAGC  CTGAGAAACG  GCTACC  A  CATC  CAAG  GAAG  GCA  GCAGGCGC  GCAAA  TTACCCACTCCCG  GCA  CGGGGAGGTA  G  TGACGAAAA
EUE_Saccharissa_vicina_D1592_xy                     ---  -----  ---  ---  -  -----  -  -----------  -  --------  -------------  --  ---------------  -------  -----------  ------  ---  ------  --------------------  ------  ----  ----  ---------------  -----  ----------------  ---------  ----------  ----  ----------  ---- -----    --------------  -------------  ------  --------------  ------------------  -----  -----------  ---------  ------  --------  ---  -----------------  ----------------------  -------  --------------------  --- --------  ----  -----------  ---    -    ------  ----------  ------  -  ----  ----  ----  ---  --------  -----  -------------  ---  ----------  -  ---------
EUE_Schizaspidia_aenea_D0655_uxyz                   ---  -----  ---  ---  -  -----  -  -----------  -  --------  -------------  --  ---------------  -------  -----------  ------  ---  ------  --------------------  ------  ----  ----  ---------------  -----  ----------------  ---------  ----------  ----  ----------  ---- -----    --------------  -------------  ------  --------------  ------------------  -----  -----------  ---------  ------  --------  ---  -----------------  ----------------------  -------  --------------------  --- --------  ----  -----------  ---    -    ------  ----------  ------  -  ----  ----  ----  ---  --------  -----  -------------  ---  ----------  -  ---------
EUE_Substilbula_pallidiclava_D0965_uxyz             ---  -----  ---  ---  -  -----  -  -----------  -  --------  -------------  --  ---------------  -------  -----------  ------  ---  ------  --------------------  ------  ----  ----  ---------------  -----  ----------------  ---------  ----------  ----  ----------  ---- -----    --------------  -------------  ------  --------------  ------------------  -----  -----------  ---------  ------  --------  ---  -----------------  ----------------------  -------  --------------------  --- --------  ----  -----------  ---    -    ------  ----------  ------  -  ----  ----  ----  ---  --------  -----  -------------  ---  ----------  -  ---------
EUG_Anorasema_pallidipes_D0408_uxyz                 ---  -----  ---  ---  -  -----  -  -----------  -  --------  -------------  --  ---------------  -------  -----------  ------  ---  ------  --------------------  ------  ----  ----  ---------------  -----  ----------------  ---------  ----------  ----  ----------  ---- -----    --------------  -------------  ------  --------------  ------------------  -----  -----------  ---------  ------  --------  ---  -----------------  ----------------------  -------  --------------------  --- --------  ----  -----------  ---    -    ------  ----------  ------  -  ----  ----  ----  ---  --------  -----  -------------  ---  ----------  -  ---------
EUG_Gollumiella_antennata_D0351a_uxy                ---  -----  ---  ---  -  -----  -  -----------  -  --------  -------------  --  ---------------  -------  -----------  ------  ---  ------  --------------------  ------  ----  ----  ---------------  -----  ----------------  ---------  ----------  ----  ----------  ---- -----    --------------  -------------  ------  --------------  ------------------  -----  -----------  ---------  ------  --------  ---  -----------------  ----------------------  -------  --------------------  --- --------  ----  -----------  ---    -    ------  ----------  ------  -  ----  ----  ----  ---  --------  -----  -------------  ---  ----------  -  ---------
EUG_Gollumiella_longipetiolata_D0405c_vxyz          ---  -----  ---  ---  -  -----  -  -----------  -  --------  -------------  --  ---------------  -------  -----------  ------  ---  ------  --------------------  ------  ----  ----  ---------------  -----  ----------------  ---------  ----------  ----  ----------  ---- -----    --------------  -------------  ------  --------------  ------------------  -----  -----------  ---------  ------  --------  ---  -----------------  ----------------------  -------  --------------------  --- --------  ----  -----------  ---    -    ------  ----------  ------  -  ----  ----  ----  ---  --------  -----  -------------  ---  ----------  -  ---------
EUO_Indosema_indica_D2212_uvxyz                     ---  -----  ---  ---  -  -----  -  -----------  -  --------  -------------  --  ---------------  -------  -----------  ------  ---  ------  --------------------  ------  ----  ----  ---------------  -----  ----------------  ---------  ----------  ----  ----------  ---- -----    --------------  -------------  ------  --------------  ------------------  -----  -----------  ---------  ------  --------  ---  -----------------  ----------------------  -------  --------------------  --- --------  ----  -----------  ---    -    ------  ----------  ------  -  ----  ----  ----  ---  --------  -----  -------------  ---  ----------  -  ---------
EUO_Orasema_communis_D0951_vxyz                     ---  -----  ---  ---  -  -----  -  -----------  -  --------  -------------  --  ---------------  -------  -----------  ------  ---  ------  --------------------  ------  ----  ----  ---------------  -----  ----------------  ---------  ----------  ----  ----------  ---- -----    --------------  -------------  ------  --------------  ------------------  -----  -----------  ---------  ------  --------  ---  -----------------  ----------------------  -------  --------------------  --- --------  ----  -----------  ---    -    ------  ----------  ------  -  ----  ----  ----  ---  --------  -----  -------------  ---  ----------  -  ---------
EUO_Orasema_delicatula_D0632_vxyz                   ---  -----  ---  ---  -  -----  -  -----------  -  --------  -------------  --  ---------------  -------  -----------  ------  ---  ------  --------------------  ------  ----  ----  ---------------  -----  ----------------  ---------  ----------  ----  ----------  ---- -----    --------------  -------------  ------  --------------  ------------------  -----  -----------  ---------  ------  --------  ---  -----------------  ----------------------  -------  --------------------  --- --------  ----  -----------  ---    -    ------  ----------  ------  -  ----  ----  ----  ---  --------  -----  -------------  ---  ----------  -  ---------
EUO_Orasema_glabra_D0183_xyz                        ---  -----  ---  ---  -  -----  -  -----------  -  --------  -------------  --  ---------------  -------  -----------  ------  ---  ------  --------------------  ------  ----  ----  ---------------  -----  ----------------  ---------  ----------  ----  ----------  ---- -----    --------------  -------------  ------  --------------  ------------------  -----  -----------  ---------  ------  --------  ---  -----------------  ----------------------  -------  --------------------  --- --------  ----  -----------  ---    -    ------  ----------  ------  -  ----  ----  ----  ---  --------  -----  -------------  ---  ----------  -  ---------
EUO_Orasema_nr_coloradensis_D0433_uvxyz             ---  -----  ---  ---  -  -----  -  -----------  -  --------  -------------  --  ---------------  -------  -----------  ------  ---  ------  --------------------  ------  ----  ----  ---------------  -----  ----------------  ---------  ----------  ----  ----------  ---- -----    --------------  -------------  ------  --------------  ------------------  -----  -----------  ---------  ------  --------  ---  -----------------  ----------------------  -------  --------------------  --- --------  ----  -----------  ---    -    ------  ----------  ------  -  ----  ----  ----  ---  --------  -----  -------------  ---  ----------  -  ---------
EUO_Orasema_simplex_D2256_tuxyz                     ---  -----  ---  ---  -  -----  -  -----------  -  --------  -------------  --  ---------------  -------  -----------  ------  ---  ------  ------------CCTTAGAT  CGTACC  CACA  TTTA  CTTGGATAACTGTGG  TAATT  CTAGAGCTAATACATG  CAAACCAGA  GCTCCGACCA  GAGA  TGGAAGGAAC  GCTT TTATT    AGATCAAAACCAAT  CGGTGG-CGAG--  ttt-cc  --CTCGT-CCATCG  TTAGCCTTGGTGACTCTG  AATAA  CTTTGTGCTGA  TCGCACGGT  CTC-GT  ACCGGCGA  CGC  ATCTTTCAAATGTCTGC  CTTATCAACTGTCGATGGTAGG  TTCTGCG  CCTACCATGGTTGTAACGGG  TAA CGGGGAAT  CAGG  TTTCGATTCCG  GAG    A    GGGAGC  CTGAGAAACG  GCTACC  A  CATC  CAAG  GAAG  GCA  GCAGGCGC  GCAAA  TTACCCACTCCCG  GCA  CGGGGAGGTA  G  TGACGAAAA
EUO_Orasema_simulatrix_D0422_vxyz                   ---  -----  ---  ---  -  -----  -  -----------  -  --------  -------------  --  ---------------  -------  -----------  ------  ---  ------  --------------------  ------  ----  ----  ---------------  -----  ----------------  ---------  ----------  ----  ----------  ---- -----    --------------  -------------  ------  --------------  ------------------  -----  -----------  ---------  ------  --------  ---  -----------------  ----------------------  -------  --------------------  --- --------  ----  -----------  ---    -    ------  ----------  ------  -  ----  ----  ----  ---  --------  -----  -------------  ---  ----------  -  ---------
EUO_Orasema_sp1_D1263_xyz                           ---  -----  ---  ---  -  -----  -  -----------  -  --------  -------------  --  ---------------  -------  -----------  ------  ---  ------  --------------------  ------  ----  ----  ---------------  -----  ----------------  ---------  ----------  ----  ----------  ---- -----    --------------  -------------  ------  --------------  ------------------  -----  -----------  ---------  ------  --------  ---  -----------------  ----------------------  -------  --------------------  --- --------  ----  -----------  ---    -    ------  ----------  ------  -  ----  ----  ----  ---  --------  -----  -------------  ---  ----------  -  ---------
EUO_Orasema_sp3_D0908_uvxyz                         ---  -----  ---  ---  -  -----  -  -----------  -  --------  -------------  --  ---------------  -------  -----------  ------  ---  ------  --------------------  ------  ----  ----  ---------------  -----  ----------------  ---------  ----------  ----  ----------  ---- -----    --------------  -------------  ------  --------------  ------------------  -----  -----------  ---------  ------  --------  ---  -----------------  ----------------------  -------  --------------------  --- --------  ----  -----------  ---    -    ------  ----------  ------  -  ----  ----  ----  ---  --------  -----  -------------  ---  ----------  -  ---------
EUO_Orasema_synempora_D1803_uvxyz                   ---  -----  ---  ---  -  -----  -  -----------  -  --------  -------------  --  ---------------  -------  -----------  ------  ---  ------  --------------------  ------  ----  ----  ---------------  -----  ----------------  ---------  ----------  ----  ----------  ---- -----    --------------  -------------  ------  --------------  ------------------  -----  -----------  ---------  ------  --------  ---  -----------------  ----------------------  -------  --------------------  --- --------  ----  -----------  ---    -    ------  ----------  ------  -  ----  ----  ----  ---  --------  -----  -------------  ---  ----------  -  ---------
EUO_Orasema_texana_D0123_vxyz                       ---  -----  ---  ---  -  -----  -  -----------  -  --------  -------------  --  ---------------  -------  -----------  ------  ---  ------  --------------------  ------  ----  ----  ---------------  -----  ----------------  ---------  ----------  ----  ----------  ---- -----    --------------  -------------  ------  --------------  ------------------  -----  -----------  ---------  ------  --------  ---  -----------------  ----------------------  -------  --------------------  --- --------  ----  -----------  ---    -    ------  ----------  ------  -  ----  ----  ----  ---  --------  -----  -------------  ---  ----------  -  ---------
EUO_Orasemorpha_didentata_D0279_xy                  ---  -----  ---  ---  -  -----  -  -----------  -  --------  -------------  --  ---------------  -------  -----------  ------  ---  ------  --------------------  ------  ----  ----  ---------------  -----  ----------------  ---------  ----------  ----  ----------  ---- -----    --------------  -------------  ------  --------------  ------------------  -----  -----------  ---------  ------  --------  ---  -----------------  ----------------------  -------  --------------------  --- --------  ----  -----------  ---    -    ------  ----------  ------  -  ----  ----  ----  ---  --------  -----  -------------  ---  ----------  -  ---------
EUO_Orasemorpha_eribotes_D0162_vxyz                 ---  -----  ---  ---  -  -----  -  -----------  -  --------  -------------  --  ---------------  -------  -----------  ------  ---  ------  --------------------  ------  ----  ----  ---------------  -----  ----------------  ---------  ----------  ----  ----------  ---- -----    --------------  -------------  ------  --------------  ------------------  -----  -----------  ---------  ------  --------  ---  -----------------  ----------------------  -------  --------------------  --- --------  ----  -----------  ---    -    ------  ----------  ------  -  ----  ----  ----  ---  --------  -----  -------------  ---  ----------  -  ---------
EUO_Orasemorpha_tridentata_a_D0182_uvxyz            ---  -----  ---  ---  -  -----  -  -----------  -  --------  -------------  --  ---------------  -------  -----------  ------  ---  ------  --------------------  ------  ----  ----  ---------------  -----  ----------------  ---------  ----------  ----  ----------  ---- -----    --------------  -------------  ------  --------------  ------------------  -----  -----------  ---------  ------  --------  ---  -----------------  ----------------------  -------  --------------------  --- --------  ----  -----------  ---    -    ------  ----------  ------  -  ----  ----  ----  ---  --------  -----  -------------  ---  ----------  -  ---------
EUO_Orasemorpha_tridentata_b_D0165_uvxy             ---  -----  ---  ---  -  -----  -  -----------  -  --------  -------------  --  ---------------  -------  -----------  ------  ---  ------  --------------------  ------  ----  ----  ---------------  -----  ----------------  ---------  ----------  ----  ----------  ---- -----    --------------  -------------  ------  --------------  ------------------  -----  -----------  ---------  ------  --------  ---  -----------------  ----------------------  -------  --------------------  --- --------  ----  -----------  ---    -    ------  ----------  ------  -  ----  ----  ----  ---  --------  -----  -------------  ---  ----------  -  ---------
EUO_Timioderus_peridentatus_D0116_uxyz              ---  -----  ---  ---  -  -----  -  -----------  -  --------  -------------  --  ---------------  -------  -----------  ------  ---  ------  --------------------  ------  ----  ----  ---------------  -----  ----------------  ---------  ----------  ----  ----------  ---- -----    --------------  -------------  ------  --------------  ------------------  -----  -----------  ---------  ------  --------  ---  -----------------  ----------------------  -------  --------------------  --- --------  ----  -----------  ---    -    ------  ----------  ------  -  ----  ----  ----  ---  --------  -----  -------------  ---  ----------  -  ---------
EUO_Timioderus_refringens_D0185_xy                  ---  -----  ---  ---  -  -----  -  -----------  -  --------  -------------  --  ---------------  -------  -----------  ------  ---  ------  --------------------  ------  ----  ----  ---------------  -----  ----------------  ---------  ----------  ----  ----------  ---- -----    --------------  -------------  ------  --------------  ------------------  -----  -----------  ---------  ------  --------  ---  -----------------  ----------------------  -------  --------------------  --- --------  ----  -----------  ---    -    ------  ----------  ------  -  ----  ----  ----  ---  --------  -----  -------------  ---  ----------  -  ---------
EYE_Aiolomorphus_rhopaloides_D1634_txyz             ---  -----  ---  ---  -  -----  -  ----ATATGCT  T  GTCTCAAA  GATTAAGCCATGC  AT  GTCTCAGTGCATGCC  GAATTAA  GGTGAAACCGC  GAATGG  CTC  ATTAAA  TCAGTTATGGTTCCTTAGAT  CGTACC  CACA  TTTA  CTTGGATAACTGTGG  TAATT  CTAGAGCTAATACATG  CAAACCAGA  GTTCCGACCA  GAGA  TGGAAGGAAC  GCTT TTATT    AGATCAAAACCAAT  CGGTGG-CGGG--  tt--cg  --CTCGT-CCATCG  TTTACCTTGGTGACTCTG  AATAA  CTTTGTGCTGA  TCGCACGGT  CTC-GC  ACCGGCGA  CGC  ATCTTTCAAATGTCTGC  CTTATCAACTGTCGATGGTAGG  TTCTGCG  CCTACCATGGTTGTAACGGG  TAA CGGGGAAT  CAGG  GTTCGATTCCG  GAG    A    GGGAGC  CTGAGAAACG  GCTACC  A  CATC  CAAG  GAAG  GCA  GCAGGCGC  GCAAA  TTACCCACTCCCG  GCA  CGGGGAGGTA  G  TGACGAAAA
EYE_Axanthosoma_nr_nigrum_D1635_uxy                 ---  -----  ---  ---  -  -----  -  -----------  -  --------  -------------  --  ---------------  -------  -----------  ------  ---  ------  --------------------  ------  ----  ----  ---------------  -----  ----------------  ---------  ----------  ----  ----------  ---- -----    --------------  -------------  ------  --------------  ------------------  -----  -----------  ---------  ------  --------  ---  -----------------  ----------------------  -------  --------------------  --- --------  ----  -----------  ---    -    ------  ----------  ------  -  ----  ----  ----  ---  --------  -----  -------------  ---  ----------  -  ---------
EYE_Buresium_sp_D2223_tuxyz                         TAC  CTGGT  TGA  TCC  T  GCCAG  T  AGTCATATGCT  T  GTCTCAAA  GATTAAGCCATGC  AT  GTCTCAGTGCATGCC  GAATTAA  GGTGAAACCGC  GAATGG  CTC  ATTAAA  TCAGTTATGGTTCCTTAGAT  CGTACC  CACA  TTTA  CTTGGATAACTGTGG  TAATT  CTAGAGCTAATACATG  CAAACCAGA  GTTCCGACCA  GAGA  TGGAAGGAAC  GCTT TTATT    AGATCAAAACCAAT  CGGTGG-CAGG--  ta--cg  --CCAGT-CCACCG  TTTACCTTGGTGACTCTG  AATAA  CTTTGTGCTGA  TCGCACGGT  CTC-GC  ACCGGCGA  CGC  ATCTTTCAAATGTCTGC  CTTATCAACTGTCGATGGTAGG  TTCTGCG  CCTACCATGGTTGTAACGGG  TAA CGGGGAAT  CAGG  GTTCGATTCCG  GAG    A    GGGAGC  CTGAGAAACG  GCTACC  A  CATC  CAAG  GAAG  GCA  GCAGGCGC  GCAAA  TTACCCACTCCCG  GCA  CGGGGAGGTA  G  TGACGAAAA
EYE_Eurytoma_gigantea_D1646_tuvxyz                  TAC  CTGGT  TGA  TCC  T  GCCAG  T  AGTCATATGCT  T  GTCTCAAA  GATTAAGCCATGC  AT  GTCTCAGTGCATGCC  GAATTAA  GGTGAAACCGC  GAATGG  CTC  ATTAAA  TCAGTTATGGTTCCTTAGAT  CGTACC  CACA  TTTA  CTTGGATAACTGTGG  TAATT  CTAGAGCTAATACATG  CAAACCAGA  GTTCCGACCA  GAGA  TGGAAGGAAC  GCTT TTATT    AGATCAAAACCAAT  CGGTGG-CGGG--  tt--cg  --CTCGT-CCATCG  TTTACCTTGGTGACTCTG  AATAA  CTTTGGGCTGA  TCGCACGGT  CTC-GC  ACCGGCGA  CGC  ATCTTTCAAATGTCTGC  CTTATCAACTGTCGATGGTAGG  TTCTGCG  CCTACCATGGTTGTAACGGG  TAA CGGGGAAT  CAGG  GTTCGATTCCG  GAG    A    GGGAGC  CTGAGAAACG  GCTACC  A  CATC  CAAG  GAAG  GCA  GCAGGCGC  GCAAA  TTACCCACTCCCG  GCA  CGGGGAGGTA  G  TGACGAAAA
EYE_Eurytoma_rhois_D1640_uxy                        ---  -----  ---  ---  -  -----  -  -----------  -  --------  -------------  --  ---------------  -------  -----------  ------  ---  ------  --------------------  ------  ----  ----  ---------------  -----  ----------------  ---------  ----------  ----  ----------  ---- -----    --------------  -------------  ------  --------------  ------------------  -----  -----------  ---------  ------  --------  ---  -----------------  ----------------------  -------  --------------------  --- --------  ----  -----------  ---    -    ------  ----------  ------  -  ----  ----  ----  ---  --------  -----  -------------  ---  ----------  -  ---------
EYE_Eurytoma_sp1a_D1343_uvxy                        ---  -----  ---  ---  -  -----  -  -----------  -  --------  -------------  --  ---------------  -------  -----------  ------  ---  ------  --------------------  ------  ----  ----  ---------------  -----  ----------------  ---------  ----------  ----  ----------  ---- -----    --------------  -------------  ------  --------------  ------------------  -----  -----------  ---------  ------  --------  ---  -----------------  ----------------------  -------  --------------------  --- --------  ----  -----------  ---    -    ------  ----------  ------  -  ----  ----  ----  ---  --------  -----  -------------  ---  ----------  -  ---------
EYE_Eurytoma_sp1b_D1344_uxy                         ---  -----  ---  ---  -  -----  -  -----------  -  --------  -------------  --  ---------------  -------  -----------  ------  ---  ------  --------------------  ------  ----  ----  ---------------  -----  ----------------  ---------  ----------  ----  ----------  ---- -----    --------------  -------------  ------  --------------  ------------------  -----  -----------  ---------  ------  --------  ---  -----------------  ----------------------  -------  --------------------  --- --------  ----  -----------  ---    -    ------  ----------  ------  -  ----  ----  ----  ---  --------  -----  -------------  ---  ----------  -  ---------
EYE_Eurytoma_squamosa_D1645_uxy                     ---  -----  ---  ---  -  -----  -  -----------  -  --------  -------------  --  ---------------  -------  -----------  ------  ---  ------  --------------------  ------  ----  ----  ---------------  -----  ----------------  ---------  ----------  ----  ----------  ---- -----    --------------  -------------  ------  --------------  ------------------  -----  -----------  ---------  ------  --------  ---  -----------------  ----------------------  -------  --------------------  --- --------  ----  -----------  ---    -    ------  ----------  ------  -  ----  ----  ----  ---  --------  -----  -------------  ---  ----------  -  ---------
EYE_Ficomila_sp_R1987_02_uxz                        ---  -----  ---  ---  -  -----  -  -----------  -  --------  -------------  --  ---------------  -------  -----------  ------  ---  ------  --------------------  ------  ----  ----  ---------------  -----  ----------------  ---------  ----------  ----  ----------  ---- -----    --------------  -------------  ------  --------------  ------------------  -----  -----------  ---------  ------  --------  ---  -----------------  ----------------------  -------  --------------------  --- --------  ----  -----------  ---    -    ------  ----------  ------  -  ----  ----  ----  ---  --------  -----  -------------  ---  ----------  -  ---------
EYE_Masneroma_angulifera_D1637_tuvxy                TAC  CTGGT  TGA  TCC  T  GCCAG  T  AGTCATATGCT  T  GTCTCAAA  GATTAAGCCATGC  AT  GTTTCAGTGCATGCC  GAATTAA  GGTGAAACCGC  GAATGG  CTC  ATTAAA  TCAGTTATGGTTCCTTAGAT  CGTACC  CACA  TTTA  CTTGGATAACTGTGG  TAATT  CTAGAGCTAATACATG  CAAACCAGA  GTTCCGACCA  GAGA  TGGAAGGAAC  GCTT TTATT    AGATCAAAACCAAT  CGGTGG-CGGG--  tt--cg  --CTCGT-CCATCG  TTTACCTTGGTGACTCTG  AATAA  CTTTGTGCTGA  TCGCACGGT  CTC-GC  ACCGGCGA  CGC  ATCTTTCAAATGTCTGC  CTTATCAACTGTCGATGGTAGG  TTCTGCG  CCTACCATGGTTGTAACGGG  TAA CGGGGAAT  CAGG  GTTCGATTCCG  GAG    A    GGGAGC  CTGAGAAACG  GCTACC  A  CATC  CAAG  GAAG  GCA  GCAGGCGC  GCAAA  TTACCCACTCCCG  GCA  CGGGGAGGTA  G  TGACGAAAA
EYE_Sycophila_sp_D1643_vxy                          ---  -----  ---  ---  -  -----  -  -----------  -  --------  -------------  --  ---------------  -------  -----------  ------  ---  ------  --------------------  ------  ----  ----  ---------------  -----  ----------------  ---------  ----------  ----  ----------  ---- -----    --------------  -------------  ------  --------------  ------------------  -----  -----------  ---------  ------  --------  ---  -----------------  ----------------------  -------  --------------------  --- --------  ----  -----------  ---    -    ------  ----------  ------  -  ----  ----  ----  ---  --------  -----  -------------  ---  ----------  -  ---------
EYE_Sycophila_texana_D1636_tuvxy                    ---  -----  ---  ---  -  -----  -  ----ATATGCT  T  GTCTCAAA  GATTAAGCCATGC  AT  GTCTCAGTGCATGCC  GAATTAA  GGTGAAACCGC  GAATGG  CTC  ATTAAA  TCAGTTATGGTTCCTTAGAT  CGTACC  CACA  TTTA  CTTGGATAACTGTGG  TAATT  CTAGAGCTAATACATG  CAAACCAGA  GTCCCGACCA  GAGA  TGGAAGGGAC  GCTT TTATT    AGATCAAAACCAAT  CGGTGG-CGGG--  tt--cg  --CTCGT-CCATCG  TTTACCTTGGTGACTCTG  AATAA  CTTTGTGCTGA  TCGCACGGT  CTC-GC  ACCGGCGA  CGC  ATCTTTCAAATGTCTGC  CTTATCAACTGTCGATGGTAGG  TTCTGCG  CCTACCATGGTTGTAACGGG  TAA CGGGGAAT  CAGG  GTTCGATTCCG  GAG    A    GGGAGC  CTGAGAAACG  GCTACC  A  CATC  CAAG  GAAG  GCA  GCAGGCGC  GCAAA  TTACCCACTCCCG  GCA  CGGGGAGGTA  G  TGACGAAAA
EYE_Systole_coriandri_D1638_uvxy                    ---  -----  ---  ---  -  -----  -  -----------  -  --------  -------------  --  ---------------  -------  -----------  ------  ---  ------  --------------------  ------  ----  ----  ---------------  -----  ----------------  ---------  ----------  ----  ----------  ---- -----    --------------  -------------  ------  --------------  ------------------  -----  -----------  ---------  ------  --------  ---  -----------------  ----------------------  -------  --------------------  --- --------  ----  -----------  ---    -    ------  ----------  ------  -  ----  ----  ----  ---  --------  -----  -------------  ---  ----------  -  ---------
EYE_Tetramesa_sp1_D1502_uvxy                        ---  -----  ---  ---  -  -----  -  -----------  -  --------  -------------  --  ---------------  -------  -----------  ------  ---  ------  --------------------  ------  ----  ----  ---------------  -----  ----------------  ---------  ----------  ----  ----------  ---- -----    --------------  -------------  ------  --------------  ------------------  -----  -----------  ---------  ------  --------  ---  -----------------  ----------------------  -------  --------------------  --- --------  ----  -----------  ---    -    ------  ----------  ------  -  ----  ----  ----  ---  --------  -----  -------------  ---  ----------  -  ---------
EYE_Tetramesa_sp2_D1642_tuxy                        ---  -----  ---  ---  -  -----  -  ----ATATGCT  T  GTCTCAAA  GATTAAGCCATGC  AT  GTCTCAGTACATGCC  GAATTAA  GGTGAAACCGC  GAATGG  CTC  ATTAAA  TCAGTTATGGTTCCTTAGAT  CGTACC  CACA  TTTA  CTTGGATAACTGTGG  TAATT  CTAGAGCTAATACATG  CAAACCAGA  GTTCCGACCA  GAGA  TGGAAGGAAC  GCTT TTATT    AGATCAAAACCAAT  CGGTGG-CGGG--  tt--cg  --CTCGT-CCATCG  TTTACCTTGGTGACTCTG  AATAA  CTTTGTGCTGA  TCGCACGGT  CTC-GT  ACCGGCGA  CGC  ATCTTTCAAATGTCTGC  CTTATCAACTGTCGATGGTAGG  TTCTGCG  CCTACCATGGTTGTAACGGG  TAA CGGGGAAT  CAGG  GTTCGATTCCG  GAG    A    GGGAGC  CTGAGAAACG  GCTACC  A  CATC  CAAG  GAAG  GCA  GCAGGCGC  GCAAA  TTACCCACTCCCG  GCA  CGGGGAGGTA  G  TGACGAAAA
EYH_Heimbra_opaca_D1440_uvxyz                       ---  -----  ---  ---  -  -----  -  -----------  -  --------  -------------  --  ---------------  -------  -----------  ------  ---  ------  --------------------  ------  ----  ----  ---------------  -----  ----------------  ---------  ----------  ----  ----------  ---- -----    --------------  -------------  ------  --------------  ------------------  -----  -----------  ---------  ------  --------  ---  -----------------  ----------------------  -------  --------------------  --- --------  ----  -----------  ---    -    ------  ----------  ------  -  ----  ----  ----  ---  --------  -----  -------------  ---  ----------  -  ---------
EYR_Austrophotismus_daicles_D1633_xy                ---  -----  ---  ---  -  -----  -  -----------  -  --------  -------------  --  ---------------  -------  -----------  ------  ---  ------  --------------------  ------  ----  ----  ---------------  -----  ----------------  ---------  ----------  ----  ----------  ---- -----    --------------  -------------  ------  --------------  ------------------  -----  -----------  ---------  ------  --------  ---  -----------------  ----------------------  -------  --------------------  --- --------  ----  -----------  ---    -    ------  ----------  ------  -  ----  ----  ----  ---  --------  -----  -------------  ---  ----------  -  ---------
EYR_Rileya_atopogaster_D1644_vxy                    ---  -----  ---  ---  -  -----  -  -----------  -  --------  -------------  --  ---------------  -------  -----------  ------  ---  ------  --------------------  ------  ----  ----  ---------------  -----  ----------------  ---------  ----------  ----  ----------  ---- -----    --------------  -------------  ------  --------------  ------------------  -----  -----------  ---------  ------  --------  ---  -----------------  ----------------------  -------  --------------------  --- --------  ----  -----------  ---    -    ------  ----------  ------  -  ----  ----  ----  ---  --------  -----  -------------  ---  ----------  -  ---------
EYR_Rileya_grisselli_D2027_tuvxyz                   TAC  CTGGT  TGA  TCC  T  GCCAG  T  AGTCATATGCT  T  GTCTCAAA  GATTAAGCCATGC  AT  GTCTCAGTGCATGCC  GTATTAA  GGTGAAACCGC  GAATGG  CTC  ATTAAA  TCAGTTATGGTTCCTTAGAT  CGTACC  CACA  TTTA  CTTGGATAACTGTGG  TAATT  CTAGAGCTAATACATG  CAAACTAGA  GTTCCGACCA  GAGA  TGGAAGGAAC  GCTT TTATT    AGATCAAAACCAAT  CGGTGG-CGGGC-  t---tt  -GCTCGT-CCACCG  TTTACCTTGGTGACTCTG  AATAA  CTTTGTGCTGA  TCGCACGGT  CTC-GC  ACCGGCGA  CGC  ATCTTTCAAATGTCTGC  CTTATCAACTGTCGATGGTAGG  TTCTGCG  CCTACCATGGTTGTAACGGG  TAA CGGGGAAT  CAGG  GTTCGATTCCG  GAG    A    GGGAGC  CTGAGAAACG  GCTACC  A  CATC  CAAG  GAAG  GCA  GCAGGCGC  GCAAA  TTACCCACTCCCG  GCA  CGGGGAGGTA  G  TGACGAAAA
EYR_Rileya_longiterga_D1639_uxyz                    ---  -----  ---  ---  -  -----  -  -----------  -  --------  -------------  --  ---------------  -------  -----------  ------  ---  ------  --------------------  ------  ----  ----  ---------------  -----  ----------------  ---------  ----------  ----  ----------  ---- -----    --------------  -------------  ------  --------------  ------------------  -----  -----------  ---------  ------  --------  ---  -----------------  ----------------------  -------  --------------------  --- --------  ----  -----------  ---    -    ------  ----------  ------  -  ----  ----  ----  ---  --------  -----  -------------  ---  ----------  -  ---------
EYR_Rileya_piercei_D1341_uvxy                       ---  -----  ---  ---  -  -----  -  -----------  -  --------  -------------  --  ---------------  -------  -----------  ------  ---  ------  --------------------  ------  ----  ----  ---------------  -----  ----------------  ---------  ----------  ----  ----------  ---- -----    --------------  -------------  ------  --------------  ------------------  -----  -----------  ---------  ------  --------  ---  -----------------  ----------------------  -------  --------------------  --- --------  ----  -----------  ---    -    ------  ----------  ------  -  ----  ----  ----  ---  --------  -----  -------------  ---  ----------  -  ---------
EYR_Rileya_pallidipes_D1471_uvxyz                   ---  -----  ---  ---  -  -----  -  -----------  -  --------  -------------  --  ---------------  -------  -----------  ------  ---  ------  --------------------  ------  ----  ----  ---------------  -----  ----------------  ---------  ----------  ----  ----------  ---- -----    --------------  -------------  ------  --------------  ------------------  -----  -----------  ---------  ------  --------  ---  -----------------  ----------------------  -------  --------------------  --- --------  ----  -----------  ---    -    ------  ----------  ------  -  ----  ----  ----  ---  --------  -----  -------------  ---  ----------  -  ---------
LEU_Leucospis_affinis_a_D0001_ux                    ---  -----  ---  ---  -  -----  -  -----------  -  --------  -------------  --  ---------------  -------  -----------  ------  ---  ------  --------------------  ------  ----  ----  ---------------  -----  ----------------  ---------  ----------  ----  ----------  ---- -----    --------------  -------------  ------  --------------  ------------------  -----  -----------  ---------  ------  --------  ---  -----------------  ----------------------  -------  --------------------  --- --------  ----  -----------  ---    -    ------  ----------  ------  -  ----  ----  ----  ---  --------  -----  -------------  ---  ----------  -  ---------
LEU_Leucospis_affinis_b_D1784_uvxyz                 ---  -----  ---  ---  -  -----  -  -----------  -  --------  -------------  --  ---------------  -------  -----------  ------  ---  ------  --------------------  ------  ----  ----  ---------------  -----  ----------------  ---------  ----------  ----  ----------  ---- -----    --------------  -------------  ------  --------------  ------------------  -----  -----------  ---------  ------  --------  ---  -----------------  ----------------------  -------  --------------------  --- --------  ----  -----------  ---    -    ------  ----------  ------  -  ----  ----  ----  ---  --------  -----  -------------  ---  ----------  -  ---------
LEU_Leucospis_sp1_D1268_uxyz                        ---  -----  ---  ---  -  -----  -  -----------  -  --------  -------------  --  ---------------  -------  -----------  ------  ---  ------  --------------------  ------  ----  ----  ---------------  -----  ----------------  ---------  ----------  ----  ----------  ---- -----    --------------  -------------  ------  --------------  ------------------  -----  -----------  ---------  ------  --------  ---  -----------------  ----------------------  -------  --------------------  --- --------  ----  -----------  ---    -    ------  ----------  ------  -  ----  ----  ----  ---  --------  -----  -------------  ---  ----------  -  ---------
LEU_Leucospis_sp2_D1368_tuvxyz                      TAC  CTGGT  TGA  TCC  T  GCCAG  T  AGTCATATGCT  T  GTCTCAAA  GATTAAGCCATGC  AT  GTCTCAGTGCATGCC  GAATTAA  GGTGAAACCGC  GAATGG  CTC  ATTAAA  TCAGTTATGGTTCCTTAGAT  CGTACC  CACA  TTTA  CTTGGATAACTGTGG  TAATT  CTAGAGCTAATACATG  CAAACCAGA  GTTCCGACCA  GAGA  TGGAAGGAAC  GCTT TTATT    AGATCAAAACCAAT  CGGTGG-CGGG--  ttt-ct  --CTCGT-CCACCG  TTTACCTTGGTGACTCTG  AATAA  CTTTGTGCTGA  TCGCAGGGT  CTA-GC  ACCGGCGA  CGA  ATCTTTCAAATGTCTGC  CTTATCAACTGTCGATGGTAGG  TTCTGCG  CCTACCATGGTCATAACGGG  TAA CGGGGAAT  CAGG  GTTCGATTCCG  GAG    A    GGGAGC  CTGAGAAACG  GCTACC  A  CATC  CAAG  GAAG  GCA  GCAGGCGC  GCAAA  TTACCCACTCCCG  GCA  CGGGGAGGTA  G  TGACGAAAA
LEU_Leucospis_sp3_D2287_xyz                         ---  -----  ---  ---  -  -----  -  -----------  -  --------  -------------  --  ---------------  -------  -----------  ------  ---  ------  --------------------  ------  ----  ----  ---------------  -----  ----------------  ---------  ----------  ----  ----------  ---- -----    --------------  -------------  ------  --------------  ------------------  -----  -----------  ---------  ------  --------  ---  -----------------  ----------------------  -------  --------------------  --- --------  ----  -----------  ---    -    ------  ----------  ------  -  ----  ----  ----  ---  --------  -----  -------------  ---  ----------  -  ---------
LEU_Leucospis_sp4_D2279_uvxyz                       ---  -----  ---  ---  -  -----  -  -----------  -  --------  -------------  --  ---------------  -------  -----------  ------  ---  ------  --------------------  ------  ----  ----  ---------------  -----  ----------------  ---------  ----------  ----  ----------  ---- -----    --------------  -------------  ------  --------------  ------------------  -----  -----------  ---------  ------  --------  ---  -----------------  ----------------------  -------  --------------------  --- --------  ----  -----------  ---    -    ------  ----------  ------  -  ----  ----  ----  ---  --------  -----  -------------  ---  ----------  -  ---------
LEU_Micrapion_sp_D2278_xyz                          ---  -----  ---  ---  -  -----  -  -----------  -  --------  -------------  --  ---------------  -------  -----------  ------  ---  ------  --------------------  ------  ----  ----  ---------------  -----  ----------------  ---------  ----------  ----  ----------  ---- -----    --------------  -------------  ------  --------------  ------------------  -----  -----------  ---------  ------  --------  ---  -----------------  ----------------------  -------  --------------------  --- --------  ----  -----------  ---    -    ------  ----------  ------  -  ----  ----  ----  ---  --------  -----  -------------  ---  ----------  -  ---------
ORM_Ormyrulus_sp_D2035_uvxyz                        ---  -----  ---  ---  -  -----  -  -----------  -  --------  -------------  --  ---------------  -------  -----------  ------  ---  ------  --------------------  ------  ----  ----  ---------------  -----  ----------------  ---------  ----------  ----  ----------  ---- -----    --------------  -------------  ------  --------------  ------------------  -----  -----------  ---------  ------  --------  ---  -----------------  ----------------------  -------  --------------------  --- --------  ----  -----------  ---    -    ------  ----------  ------  -  ----  ----  ----  ---  --------  -----  -------------  ---  ----------  -  ---------
ORM_Ormyrus_sp_1_D1367_tuxyz                        ---  -----  ---  ---  -  -----  -  -----------  -  --------  -------------  --  ---------------  -------  -----------  ------  ---  ------  ------------CCTTAGAT  CGTACC  CACA  TTTA  CTTGGATAACTGTGG  TAATT  CTAGAGCTAATACATG  CAAACCAGA  GTTCCGACCA  GAGA  TGGAAGGAAC  GCTT TTATT    AGATCAAAACCAAT  CGGTGG-CGGGT-  tc--gc  -GCTCGT-CCACCG  TTTACTTTGGTGACTCTG  AATAA  CTTTGAGCTGA  TCGCACGGT  CTT-GC  ACCGGCGA  CGC  ATCTTTCAAATGTCTGC  CTTATCAACTGTCGATGGTAGG  TTCTGCG  CCTACCATGGTTGTAACGGG  TAA CGGGGAAT  CAGG  GTTCGATTCCG  GAG    A    GGGAGC  CTGAGAAACG  GCTACC  A  CATC  CAAG  GAAG  GCA  GCAGGCGC  GCAAA  TTACCCACTCCCG  GCA  CGGGGAGGTA  G  TGACGAAAA
ORM_Ormyrus_sp_2_D1491_tuxy                         ---  -----  ---  ---  -  -----  -  -----------  -  --------  -------------  --  ---------------  -------  -----------  ------  ----  -----  ------------CCTTAGAT  CGTACC  CACA  TTTA  CTTGGATAACTGTGG  TAATT  CTAGAGCTAATACATG  CAAACCAGA  GTTCCGACCA  GAGA  TGGAAGGAAC  GCTT TTATT    AGATCAAAACCAAT  CGGTGG-CGGGT-  tc--gc  -GCTCGT-CCACCG  TTTACTTTGGTGACTCTG  AATAA  CTTTGAGCTGA  TCGCACGGT  CTT-GC  ACCGGCGA  CGC  ATCTTTCAAATGTCTGC  CTTATCAACTGTCGATGGTAGG  TTCTGCG  CCTACCATGGTTGTAACGGG  TAA CGGGGAAT  CAGG  GTTCGATTCCG  GAG    A    GGGAGC  CTGAGAAACG  GCTACC  A  CATC  CAAG  GAAG  GCA  GCAGGCGC  GCAAA  TTACCCACTCCCG  GCA  CGGGGAGGTA  G  TGACGAAAA
PEA_Akapala_rudis_D0360_uxyz                        ---  -----  ---  ---  -  -----  -  -----------  -  --------  -------------  --  ---------------  -------  -----------  ------  ---  ------  --------------------  ------  ----  ----  ---------------  -----  ----------------  ---------  ----------  ----  ----------  ---- -----    --------------  -------------  ------  --------------  ------------------  -----  -----------  ---------  ------  --------  ---  -----------------  ----------------------  -------  --------------------  --- --------  ----  -----------  ---    -    ------  ----------  ------  -  ----  ----  ----  ---  --------  -----  -------------  ---  ----------  -  ---------
PEC_Brachyelatus_sp_D0316_uvxyz                     ---  -----  ---  ---  -  -----  -  -----------  -  --------  -------------  --  ---------------  -------  -----------  ------  ---  ------  --------------------  ------  ----  ----  ---------------  -----  ----------------  ---------  ----------  ----  ----------  ---- -----    --------------  -------------  ------  --------------  ------------------  -----  -----------  ---------  ------  --------  ---  -----------------  ----------------------  -------  --------------------  --- --------  ----  -----------  ---    -    ------  ----------  ------  -  ----  ----  ----  ---  --------  -----  -------------  ---  ----------  -  ---------
PEC_Austrotoxeuma_sp_D0643_uvxyz                    ---  -----  ---  ---  -  -----  -  -----------  -  --------  -------------  --  ---------------  -------  -----------  ------  ---  ------  --------------------  ------  ----  ----  ---------------  -----  ----------------  ---------  ----------  ----  ----------  ---- -----    --------------  -------------  ------  --------------  ------------------  -----  -----------  ---------  ------  --------  ---  -----------------  ----------------------  -------  --------------------  --- --------  ----  -----------  ---    -    ------  ----------  ------  -  ----  ----  ----  ---  --------  -----  -------------  ---  ----------  -  ---------
PEC_Chrysolampus_elegans_D0722_uxy                  ---  -----  ---  ---  -  -----  -  -----------  -  --------  -------------  --  ---------------  -------  -----------  ------  ---  ------  --------------------  ------  ----  ----  ---------------  -----  ----------------  ---------  ----------  ----  ----------  ---- -----    --------------  -------------  ------  --------------  ------------------  -----  -----------  ---------  ------  --------  ---  -----------------  ----------------------  -------  --------------------  --- --------  ----  -----------  ---    -    ------  ----------  ------  -  ----  ----  ----  ---  --------  -----  -------------  ---  ----------  -  ---------
PEC_Chrysolampus_elegans_D0723_uxy                  ---  -----  ---  ---  -  -----  -  -----------  -  --------  -------------  --  ---------------  -------  -----------  ------  ---  ------  --------------------  ------  ----  ----  ---------------  -----  ----------------  ---------  ----------  ----  ----------  ---- -----    --------------  -------------  ------  --------------  ------------------  -----  -----------  ---------  ------  --------  ---  -----------------  ----------------------  -------  --------------------  --- --------  ----  -----------  ---    -    ------  ----------  ------  -  ----  ----  ----  ---  --------  -----  -------------  ---  ----------  -  ---------
PEC_Chrysolampus_schwarzi_a_D0053_uvxy              ---  -----  ---  ---  -  -----  -  -----------  -  --------  -------------  --  ---------------  -------  -----------  ------  ---  ------  --------------------  ------  ----  ----  ---------------  -----  ----------------  ---------  ----------  ----  ----------  ---- -----    --------------  -------------  ------  --------------  ------------------  -----  -----------  ---------  ------  --------  ---  -----------------  ----------------------  -------  --------------------  --- --------  ----  -----------  ---    -    ------  ----------  ------  -  ----  ----  ----  ---  --------  -----  -------------  ---  ----------  -  ---------
PEC_Chrysolampus_schwarzi_b_D0371_xy                ---  -----  ---  ---  -  -----  -  -----------  -  --------  -------------  --  ---------------  -------  -----------  ------  ---  ------  --------------------  ------  ----  ----  ---------------  -----  ----------------  ---------  ----------  ----  ----------  ---- -----    --------------  -------------  ------  --------------  ------------------  -----  -----------  ---------  ------  --------  ---  -----------------  ----------------------  -------  --------------------  --- --------  ----  -----------  ---    -    ------  ----------  ------  -  ----  ----  ----  ---  --------  -----  -------------  ---  ----------  -  ---------
PEC_Chrysolampus_sisymbrii_D0970_uxy                ---  -----  ---  ---  -  -----  -  -----------  -  --------  -------------  --  ---------------  -------  -----------  ------  ---  ------  --------------------  ------  ----  ----  ---------------  -----  ----------------  ---------  ----------  ----  ----------  ---- -----    --------------  -------------  ------  --------------  ------------------  -----  -----------  ---------  ------  --------  ---  -----------------  ----------------------  -------  --------------------  --- --------  ----  -----------  ---    -    ------  ----------  ------  -  ----  ----  ----  ---  --------  -----  -------------  ---  ----------  -  ---------
PEC_Chrysolampus_sp1_D0160_uvxyz                    ---  -----  ---  ---  -  -----  -  -----------  -  --------  -------------  --  ---------------  -------  -----------  ------  ---  ------  --------------------  ------  ----  ----  ---------------  -----  ----------------  ---------  ----------  ----  ----------  ---- -----    --------------  -------------  ------  --------------  ------------------  -----  -----------  ---------  ------  --------  ---  -----------------  ----------------------  -------  --------------------  --- --------  ----  -----------  ---    -    ------  ----------  ------  -  ----  ----  ----  ---  --------  -----  -------------  ---  ----------  -  ---------
PEC_Chrysolampus_sp2_D1447_uvxyz                    ---  -----  ---  ---  -  -----  -  -----------  -  --------  -------------  --  ---------------  -------  -----------  ------  ---  ------  --------------------  ------  ----  ----  ---------------  -----  ----------------  ---------  ----------  ----  ----------  ---- -----    --------------  -------------  ------  --------------  ------------------  -----  -----------  ---------  ------  --------  ---  -----------------  ----------------------  -------  --------------------  --- --------  ----  -----------  ---    -    ------  ----------  ------  -  ----  ----  ----  ---  --------  -----  -------------  ---  ----------  -  ---------
PEC_Chrysolampus_sp3_D1009_xy                       ---  -----  ---  ---  -  -----  -  -----------  -  --------  -------------  --  ---------------  -------  -----------  ------  ---  ------  --------------------  ------  ----  ----  ---------------  -----  ----------------  ---------  ----------  ----  ----------  ---- -----    --------------  -------------  ------  --------------  ------------------  -----  -----------  ---------  ------  --------  ---  -----------------  ----------------------  -------  --------------------  --- --------  ----  -----------  ---    -    ------  ----------  ------  -  ----  ----  ----  ---  --------  -----  -------------  ---  ----------  -  ---------
PEC_Chrysomalla_hesperis_D0050_uxy                  ---  -----  ---  ---  -  -----  -  -----------  -  --------  -------------  --  ---------------  -------  -----------  ------  ---  ------  --------------------  ------  ----  ----  ---------------  -----  ----------------  ---------  ----------  ----  ----------  ---- -----    --------------  -------------  ------  --------------  ------------------  -----  -----------  ---------  ------  --------  ---  -----------------  ----------------------  -------  --------------------  --- --------  ----  -----------  ---    -    ------  ----------  ------  -  ----  ----  ----  ---  --------  -----  -------------  ---  ----------  -  ---------
PEI_Jambiya_vanharteni_D1598_xyz                    ---  -----  ---  ---  -  -----  -  -----------  -  --------  -------------  --  ---------------  -------  -----------  ------  ---  ------  --------------------  ------  ----  ----  ---------------  -----  ----------------  ---------  ----------  ----  ----------  ---- -----    --------------  -------------  ------  --------------  ------------------  -----  -----------  ---------  ------  --------  ---  -----------------  ----------------------  -------  --------------------  --- --------  ----  -----------  ---    -    ------  ----------  ------  -  ----  ----  ----  ---  --------  -----  -------------  ---  ----------  -  ---------
PEM_Aperilampus_sp_D0900_tuvxyz                     TAC  CTGGT  TGA  TCC  T  GCCAG  T  AGTCATATGCT  T  GTCTCAAA  GATTAAGCCATGC  AT  GTCTCAGTGCATGCC  GAATTAA  GGTGAAACCGC  GAATGG  CTC  ATTAAA  TCAGTTATGGTTTCTTAGAT  CGTACC  CACA  TTTA  CTTGGATAACTGTGG  TAATT  CTAGAGCTAATACATG  CAAACCAGA  GTTCCGACCA  GAGA  TGGAAGGAAC  GCTT TTATT    AGATCAAAACCAAT  CGGTGG-CGGGT-  t---tt  -ACTCGT-CCACCG  TTTAACTTGGTGACTCTG  AATAA  CTTTGTGCTGA  TCGCACGGT  CTC-GT  ACCGGCGA  CGC  ATCTTTCAAATGTCTGA  CTTATCAACTGTCGATGGTAGA  TTCTGCG  CCTACCATGGTTGTAACGGG  TAA CGGGGAAT  CAGG  GTTCGATTCCG  GAG    A    GGGAGC  CTGAGAAACG  GCTACC  A  CATC  CAAG  GAAG  GCA  GCAGGCGC  GCAAA  TTACCCACTCCCG  GCA  CGGGGAGGTA  G  TGACGAAAA
PEM_Philomides_sp_D1269_tuvxyz                      TAC  CTGGT  TGA  TCC  T  GCCAG  T  AGTCATATGCT  T  GTCTCAAA  GATTAAGCCATGC  AT  GTCTCAGTGCATGCC  GAATTAA  GGTGAAACCGC  GAATGG  CTC  ATTAAA  TCAGTTATGGTTTCTTAGAT  CGTACC  CACA  TTTA  CTTGGATAACTGTGG  TAATT  CTAGAGCTAATACATG  CAAACCAGA  GTTCCGACCA  GAGA  TGGAAGGAAC  GCTT TTATT    AGATCAAAACCAAT  CGGTGG-CGGG--  ttt-at  --CTCGT-CCACCG  TTTACCTTGGTGACTCTG  AATAA  CTTTGTGCTGA  TCGCACGGT  CTC-GT  ACCGGCGA  CGC  ATCTTTCAAATGTCTGA  CTTATCAACTGTCGATGGTAGA  TTCTGCG  CCTACCATGGTTGTAACGGG  TAA CGGGGAAT  CAGG  GTTCGATTCCG  GAG    A    GGGAGC  CTGAGAAACG  GCTACC  A  CATC  CAAG  GAAG  GCA  GCAGGCGC  GCAAA  TTACCCACTCCCG  GCA  CGGGGAGGTA  G  TGACGAAAA
PEM_Philomidinae_ng_D0903_uvxyz                     ---  -----  ---  ---  -  -----  -  -----------  -  --------  -------------  --  ---------------  -------  -----------  ------  ---  ------  --------------------  ------  ----  ----  ---------------  -----  ----------------  ---------  ----------  ----  ----------  ---- -----    --------------  -------------  ------  --------------  ------------------  -----  -----------  ---------  ------  --------  ---  -----------------  ----------------------  -------  --------------------  --- --------  ----  -----------  ---    -    ------  ----------  ------  -  ----  ----  ----  ---  --------  -----  -------------  ---  ----------  -  ---------
PEP_Burksilampus_sp1_D1006_vxyz                     ---  -----  ---  ---  -  -----  -  -----------  -  --------  -------------  --  ---------------  -------  -----------  ------  ---  ------  --------------------  ------  ----  ----  ---------------  -----  ----------------  ---------  ----------  ----  ----------  ---- -----    --------------  -------------  ------  --------------  ------------------  -----  -----------  ---------  ------  --------  ---  -----------------  ----------------------  -------  --------------------  --- --------  ----  -----------  ---    -    ------  ----------  ------  -  ----  ----  ----  ---  --------  -----  -------------  ---  ----------  -  ---------
PEP_Burksilampus_sp1_D1500_uvxy                     ---  -----  ---  ---  -  -----  -  -----------  -  --------  -------------  --  ---------------  -------  -----------  ------  ---  ------  --------------------  ------  ----  ----  ---------------  -----  ----------------  ---------  ----------  ----  ----------  ---- -----    --------------  -------------  ------  --------------  ------------------  -----  -----------  ---------  ------  --------  ---  -----------------  ----------------------  -------  --------------------  --- --------  ----  -----------  ---    -    ------  ----------  ------  -  ----  ----  ----  ---  --------  -----  -------------  ---  ----------  -  ---------
PEP_Burksilampus_sp2_D1007_xyz                      ---  -----  ---  ---  -  -----  -  -----------  -  --------  -------------  --  ---------------  -------  -----------  ------  ---  ------  --------------------  ------  ----  ----  ---------------  -----  ----------------  ---------  ----------  ----  ----------  ---- -----    --------------  -------------  ------  --------------  ------------------  -----  -----------  ---------  ------  --------  ---  -----------------  ----------------------  -------  --------------------  --- --------  ----  -----------  ---    -    ------  ----------  ------  -  ----  ----  ----  ---  --------  -----  -------------  ---  ----------  -  ---------
PEP_Euperilampus_beharae_D0963_xy                   ---  -----  ---  ---  -  -----  -  -----------  -  --------  -------------  --  ---------------  -------  -----------  ------  ---  ------  --------------------  ------  ----  ----  ---------------  -----  ----------------  ---------  ----------  ----  ----------  ---- -----    --------------  -------------  ------  --------------  ------------------  -----  -----------  ---------  ------  --------  ---  -----------------  ----------------------  -------  --------------------  --- --------  ----  -----------  ---    -    ------  ----------  ------  -  ----  ----  ----  ---  --------  -----  -------------  ---  ----------  -  ---------
PEP_Euperilampus_triangularis_D0385ab_uxy           ---  -----  ---  ---  -  -----  -  -----------  -  --------  -------------  --  ---------------  -------  -----------  ------  ---  ------  --------------------  ------  ----  ----  ---------------  -----  ----------------  ---------  ----------  ----  ----------  ---- -----    --------------  -------------  ------  --------------  ------------------  -----  -----------  ---------  ------  --------  ---  -----------------  ----------------------  -------  --------------------  --- --------  ----  -----------  ---    -    ------  ----------  ------  -  ----  ----  ----  ---  --------  -----  -------------  ---  ----------  -  ---------
PEP_Monacon_canaliculatum_D0709_uvxyz               ---  -----  ---  ---  -  -----  -  -----------  -  --------  -------------  --  ---------------  -------  -----------  ------  ---  ------  --------------------  ------  ----  ----  ---------------  -----  ----------------  ---------  ----------  ----  ----------  ---- -----    --------------  -------------  ------  --------------  ------------------  -----  -----------  ---------  ------  --------  ---  -----------------  ----------------------  -------  --------------------  --- --------  ----  -----------  ---    -    ------  ----------  ------  -  ----  ----  ----  ---  --------  -----  -------------  ---  ----------  -  ---------
PEP_Monacon_roberstsi_D0318_uvxyz                   ---  -----  ---  ---  -  -----  -  -----------  -  --------  -------------  --  ---------------  -------  -----------  ------  ---  ------  --------------------  ------  ----  ----  ---------------  -----  ----------------  ---------  ----------  ----  ----------  ---- -----    --------------  -------------  ------  --------------  ------------------  -----  -----------  ---------  ------  --------  ---  -----------------  ----------------------  -------  --------------------  --- --------  ----  -----------  ---    -    ------  ----------  ------  -  ----  ----  ----  ---  --------  -----  -------------  ---  ----------  -  ---------
PEP_Monacon_spinosum_D1014_uvxyz                    ---  -----  ---  ---  -  -----  -  -----------  -  --------  -------------  --  ---------------  -------  -----------  ------  ---  ------  --------------------  ------  ----  ----  ---------------  -----  ----------------  ---------  ----------  ----  ----------  ---- -----    --------------  -------------  ------  --------------  ------------------  -----  -----------  ---------  ------  --------  ---  -----------------  ----------------------  -------  --------------------  --- --------  ----  -----------  ---    -    ------  ----------  ------  -  ----  ----  ----  ---  --------  -----  -------------  ---  ----------  -  ---------
PEP_Perilampus_fulviconis_D0713_uvxyz               ---  -----  ---  ---  -  -----  -  -----------  -  --------  -------------  --  ---------------  -------  -----------  ------  ---  ------  --------------------  ------  ----  ----  ---------------  -----  ----------------  ---------  ----------  ----  ----------  ---- -----    --------------  -------------  ------  --------------  ------------------  -----  -----------  ---------  ------  --------  ---  -----------------  ----------------------  -------  --------------------  --- --------  ----  -----------  ---    -    ------  ----------  ------  -  ----  ----  ----  ---  --------  -----  -------------  ---  ----------  -  ---------
PEP_Perilampus_granulosus_D0263_uvxy                ---  -----  ---  ---  -  -----  -  -----------  -  --------  -------------  --  ---------------  -------  -----------  ------  ---  ------  --------------------  ------  ----  ----  ---------------  -----  ----------------  ---------  ----------  ----  ----------  ---- -----    --------------  -------------  ------  --------------  ------------------  -----  -----------  ---------  ------  --------  ---  -----------------  ----------------------  -------  --------------------  --- --------  ----  -----------  ---    -    ------  ----------  ------  -  ----  ----  ----  ---  --------  -----  -------------  ---  ----------  -  ---------
PEP_Perilampus_hyalinus_D0254_vxy                   ---  -----  ---  ---  -  -----  -  -----------  -  --------  -------------  --  ---------------  -------  -----------  ------  ---  ------  --------------------  ------  ----  ----  ---------------  -----  ----------------  ---------  ----------  ----  ----------  ---- -----    --------------  -------------  ------  --------------  ------------------  -----  -----------  ---------  ------  --------  ---  -----------------  ----------------------  -------  --------------------  --- --------  ----  -----------  ---    -    ------  ----------  ------  -  ----  ----  ----  ---  --------  -----  -------------  ---  ----------  -  ---------
PEP_Perilampus_hyalinus_D0972_uvxyz                 ---  -----  ---  ---  -  -----  -  -----------  -  --------  -------------  --  ---------------  -------  -----------  ------  ---  ------  --------------------  ------  ----  ----  ---------------  -----  ----------------  ---------  ----------  ----  ----------  ---- -----    --------------  -------------  ------  --------------  ------------------  -----  -----------  ---------  ------  --------  ---  -----------------  ----------------------  -------  --------------------  --- --------  ----  -----------  ---    -    ------  ----------  ------  -  ----  ----  ----  ---  --------  -----  -------------  ---  ----------  -  ---------
PEP_Perilampus_regalis_D0113_xy                     ---  -----  ---  ---  -  -----  -  -----------  -  --------  -------------  --  ---------------  -------  -----------  ------  ---  ------  --------------------  ------  ----  ----  ---------------  -----  ----------------  ---------  ----------  ----  ----------  ---- -----    --------------  -------------  ------  --------------  ------------------  -----  -----------  ---------  ------  --------  ---  -----------------  ----------------------  -------  --------------------  --- --------  ----  -----------  ---    -    ------  ----------  ------  -  ----  ----  ----  ---  --------  -----  -------------  ---  ----------  -  ---------
PEP_Perilampus_ruficornis_D0361_uvxyz               ---  -----  ---  ---  -  -----  -  -----------  -  --------  -------------  --  ---------------  -------  -----------  ------  ---  ------  --------------------  ------  ----  ----  ---------------  -----  ----------------  ---------  ----------  ----  ----------  ---- -----    --------------  -------------  ------  --------------  ------------------  -----  -----------  ---------  ------  --------  ---  -----------------  ----------------------  -------  --------------------  --- --------  ----  -----------  ---    -    ------  ----------  ------  -  ----  ----  ----  ---  --------  -----  -------------  ---  ----------  -  ---------
PEP_Perilampus_sp1_D0649_xyz                        ---  -----  ---  ---  -  -----  -  -----------  -  --------  -------------  --  ---------------  -------  -----------  ------  ---  ------  --------------------  ------  ----  ----  ---------------  -----  ----------------  ---------  ----------  ----  ----------  ---- -----    --------------  -------------  ------  --------------  ------------------  -----  -----------  ---------  ------  --------  ---  -----------------  ----------------------  -------  --------------------  --- --------  ----  -----------  ---    -    ------  ----------  ------  -  ----  ----  ----  ---  --------  -----  -------------  ---  ----------  -  ---------
PEP_Perilampus_sp2_D0688_uxyz                       ---  -----  ---  ---  -  -----  -  -----------  -  --------  -------------  --  ---------------  -------  -----------  ------  ---  ------  --------------------  ------  ----  ----  ---------------  -----  ----------------  ---------  ----------  ----  ----------  ---- -----    --------------  -------------  ------  --------------  ------------------  -----  -----------  ---------  ------  --------  ---  -----------------  ----------------------  -------  --------------------  --- --------  ----  -----------  ---    -    ------  ----------  ------  -  ----  ----  ----  ---  --------  -----  -------------  ---  ----------  -  ---------
PEP_Perilampus_sp3_D0854_xy                         ---  -----  ---  ---  -  -----  -  -----------  -  --------  -------------  --  ---------------  -------  -----------  ------  ---  ------  --------------------  ------  ----  ----  ---------------  -----  ----------------  ---------  ----------  ----  ----------  ---- -----    --------------  -------------  ------  --------------  ------------------  -----  -----------  ---------  ------  --------  ---  -----------------  ----------------------  -------  --------------------  --- --------  ----  -----------  ---    -    ------  ----------  ------  -  ----  ----  ----  ---  --------  -----  -------------  ---  ----------  -  ---------
PEP_Perilampus_sp4_D0967_vxyz                       ---  -----  ---  ---  -  -----  -  -----------  -  --------  -------------  --  ---------------  -------  -----------  ------  ---  ------  --------------------  ------  ----  ----  ---------------  -----  ----------------  ---------  ----------  ----  ----------  ---- -----    --------------  -------------  ------  --------------  ------------------  -----  -----------  ---------  ------  --------  ---  -----------------  ----------------------  -------  --------------------  --- --------  ----  -----------  ---    -    ------  ----------  ------  -  ----  ----  ----  ---  --------  -----  -------------  ---  ----------  -  ---------
PEP_Perilampus_sp5_D1266_uvxyz                      ---  -----  ---  ---  -  -----  -  -----------  -  --------  -------------  --  ---------------  -------  -----------  ------  ---  ------  --------------------  ------  ----  ----  ---------------  -----  ----------------  ---------  ----------  ----  ----------  ---- -----    --------------  -------------  ------  --------------  ------------------  -----  -----------  ---------  ------  --------  ---  -----------------  ----------------------  -------  --------------------  --- --------  ----  -----------  ---    -    ------  ----------  ------  -  ----  ----  ----  ---  --------  -----  -------------  ---  ----------  -  ---------
PEP_Perilampus_sp6_D1362_uxy                        ---  -----  ---  ---  -  -----  -  -----------  -  --------  -------------  --  ---------------  -------  -----------  ------  ---  ------  --------------------  ------  ----  ----  ---------------  -----  ----------------  ---------  ----------  ----  ----------  ---- -----    --------------  -------------  ------  --------------  ------------------  -----  -----------  ---------  ------  --------  ---  -----------------  ----------------------  -------  --------------------  --- --------  ----  -----------  ---    -    ------  ----------  ------  -  ----  ----  ----  ---  --------  -----  -------------  ---  ----------  -  ---------
PEP_Perilampus_subcarinatus_D0264_uvxyz             ---  -----  ---  ---  -  -----  -  -----------  -  --------  -------------  --  ---------------  -------  -----------  ------  ---  ------  --------------------  ------  ----  ----  ---------------  -----  ----------------  ---------  ----------  ----  ----------  ---- -----    --------------  -------------  ------  --------------  ------------------  -----  -----------  ---------  ------  --------  ---  -----------------  ----------------------  -------  --------------------  --- --------  ----  -----------  ---    -    ------  ----------  ------  -  ----  ----  ----  ---  --------  -----  -------------  ---  ----------  -  ---------
PEP_Steffanolampus_salicetum_D0320_uxyz             ---  -----  ---  ---  -  -----  -  -----------  -  --------  -------------  --  ---------------  -------  -----------  ------  ---  ------  --------------------  ------  ----  ----  ---------------  -----  ----------------  ---------  ----------  ----  ----------  ---- -----    --------------  -------------  ------  --------------  ------------------  -----  -----------  ---------  ------  --------  ---  -----------------  ----------------------  -------  --------------------  --- --------  ----  -----------  ---    -    ------  ----------  ------  -  ----  ----  ----  ---  --------  -----  -------------  ---  ----------  -  ---------
PT01_Asaphes_suspensus_D1541_tuvxyz                 ---  -----  ---  ---  -  -----  -  -----------  -  ---TCAAA  GATTAAGCCATGC  AT  GTCTCAGTGCATGCC  AAATTAA  GGTGAAACCGC  GAATGG  CTC  ATTAAA  TCAGTTATGGTTCCTTAGAT  CGTACC  CACA  TTTA  CTTGGATAACTGTGG  TAATT  CTAGAGCTAATACATG  CAAACCAGA  GTTCCGACCA  GAGA  TGGAAGGAAC  GCTT TTATT    AGATCAAAACCAAT  CGGTGG-CGGG--  tt--cg  --CTCGT-CCACCG  TTTACCTTGGTGACTCTG  AATAA  CTTTGTGCTGA  TCGCACGGT  CTC-GT  ACCGGCGA  CGC  ATCTTTCAAATGTCTGC  CTTATCAACTGTCGATGGTAGG  TTCTGCG  CCTACCATGGTTGTAACGGG  TAA CGGGGAAT  CAGG  GTTCGATTCCG  GAG    A    GGGAGC  CTGAGAAACG  GCTACC  A  CATC  CAAG  GAAG  GCA  GCAGGCGC  GCAAA  TTACCCACTCCCG  GCA  CGGGGAGGTA  G  TGACGAAAA
PT01_Asaphinae_sp_D2072_tuvxyz                      TAC  CTGGT  TGA  TCC  T  GCCAG  T  AGTCATATGCT  T  GTCTCAAA  GATTAAGCCATGC  AT  GTCTCAGTGCACGCC  AAATTAA  GGTGAAACCGC  GAATGG  CTC  ATTAAA  TCAGTTATGGTTCCTTAGAT  CGTACC  CACA  TTTA  CTTGGATAACTGTGG  TAATT  CTAGAGCTAATACATG  CAAACCAGA  GTTCCGACCA  GAGA  TGGGAGGAAC  GCTT TTATT    AGATCAAAACCAAT  CGGTGG-CGGG--  tt--ta  --CTCGT-CCACCG  TTTACCTTGGTGACTCTG  AATAA  CTTTGTGCTGA  TCGCACGGT  CTC-GT  ACCGGCGA  CGC  ATCTTTCAAATGTCTGC  CTTATCAACTGTCGATGGTAGG  TTCTGCG  CCTACCATGGTCGTAACGGG  TAA CGGGGAAT  CAGG  GTTCGATTCCG  GAG    A    GGGAGC  CTGAGAAACG  GCTACC  A  CATC  CAAG  GAAG  GCA  GCAGGCGC  GCAAA  TTACCCACTCCCG  GAA  CGGGGAGGTA  G  TGACGAAAA
PT01_Enoggera_sp_D1484_uvxyz                        ---  -----  ---  ---  -  -----  -  -----------  -  --------  -------------  --  ---------------  -------  -----------  ------  ---  ------  --------------------  ------  ----  ----  ---------------  -----  ----------------  ---------  ----------  ----  ----------  ---- -----    --------------  -------------  ------  --------------  ------------------  -----  -----------  ---------  ------  --------  ---  -----------------  ----------------------  -------  --------------------  --- --------  ----  -----------  ---    -    ------  ----------  ------  -  ----  ----  ----  ---  --------  -----  -------------  ---  ----------  -  ---------
PT02_Spalangiopelta_apotherisma_D1566_xyz           ---  -----  ---  ---  -  -----  -  -----------  -  --------  -------------  --  ---------------  -------  -----------  ------  ---  ------  --------------------  ------  ----  ----  ---------------  -----  ----------------  ---------  ----------  ----  ----------  ---- -----    --------------  -------------  ------  --------------  ------------------  -----  -----------  ---------  ------  --------  ---  -----------------  ----------------------  -------  --------------------  --- --------  ----  -----------  ---    -    ------  ----------  ------  -  ----  ----  ----  ---  --------  -----  -------------  ---  ----------  -  ---------
PT02_Spalangiopelta_sp1_D0400_uvxyz                 ---  -----  ---  ---  -  -----  -  -----------  -  --------  -------------  --  ---------------  -------  -----------  ------  ---  ------  --------------------  ------  ----  ----  ---------------  -----  ----------------  ---------  ----------  ----  ----------  ---- -----    --------------  -------------  ------  --------------  ------------------  -----  -----------  ---------  ------  --------  ---  -----------------  ----------------------  -------  --------------------  --- --------  ----  -----------  ---    -    ------  ----------  ------  -  ----  ----  ----  ---  --------  -----  -------------  ---  ----------  -  ---------
PT03_Acerocephala_sp_D2001_xyz                      ---  -----  ---  ---  -  -----  -  -----------  -  --------  -------------  --  ---------------  -------  -----------  ------  ---  ------  --------------------  ------  ----  ----  ---------------  -----  ----------------  ---------  ----------  ----  ----------  ---- -----    --------------  -------------  ------  --------------  ------------------  -----  -----------  ---------  ------  --------  ---  -----------------  ----------------------  -------  --------------------  --- --------  ----  -----------  ---    -    ------  ----------  ------  -  ----  ----  ----  ---  --------  -----  -------------  ---  ----------  -  ---------
PT03_Cerocephalinae_sp_D2269_vxyz                   ---  -----  ---  ---  -  -----  -  -----------  -  --------  -------------  --  ---------------  -------  -----------  ------  ---  ------  --------------------  ------  ----  ----  ---------------  -----  ----------------  ---------  ----------  ----  ----------  ---- -----    --------------  -------------  ------  --------------  ------------------  -----  -----------  ---------  ------  --------  ---  -----------------  ----------------------  -------  --------------------  --- --------  ----  -----------  ---    -    ------  ----------  ------  -  ----  ----  ----  ---  --------  -----  -------------  ---  ----------  -  ---------
PT03_Neocalosoter_sp_D1523_uxy                      ---  -----  ---  ---  -  -----  -  -----------  -  --------  -------------  --  ---------------  -------  -----------  ------  ---  ------  --------------------  ------  ----  ----  ---------------  -----  ----------------  ---------  ----------  ----  ----------  ---- -----    --------------  -------------  ------  --------------  ------------------  -----  -----------  ---------  ------  --------  ---  -----------------  ----------------------  -------  --------------------  --- --------  ----  -----------  ---    -    ------  ----------  ------  -  ----  ----  ----  ---  --------  -----  -------------  ---  ----------  -  ---------
PT04_Chromeurytoma_sp_D1522_uvxyz                   ---  -----  ---  ---  -  -----  -  -----------  -  --------  -------------  --  ---------------  -------  -----------  ------  ---  ------  --------------------  ------  ----  ----  ---------------  -----  ----------------  ---------  ----------  ----  ----------  ---- -----    --------------  -------------  ------  --------------  ------------------  -----  -----------  ---------  ------  --------  ---  -----------------  ----------------------  -------  --------------------  --- --------  ----  -----------  ---    -    ------  ----------  ------  -  ----  ----  ----  ---  --------  -----  -------------  ---  ----------  -  ---------
PT05C_Callocleonymus_sp_D2045_tuxyz                 TAC  CTGGT  TGA  TCC  T  GCCAG  T  AGTCATATGCT  T  GTCTCAAA  GATTAAGCCATGC  AT  GTCTCAGTGCATGCC  GAATTAA  GGTGAAACCGC  GAATGG  CTC  ATTAAA  TCAGTTATGGTTCCTTAGAT  CGTACC  CACA  TTTA  CTTGGATAACTGTGG  TAATT  CTAGAGCTAATACATG  CAAACTAGA  GTTCCGACCA  GAGA  TGGAAGGAAC  GCTT TTATT    AGATCAAAACCAAT  CGGTGG-CGGGC-  c---tc  -GCCCGT-CCACCG  TTTACCTTGGTGACTCTG  AATAA  CTTTGTGCTGA  TCGCACGGT  CTC-GC  ACCGGCGA  CGC  ATCTTTCAAATGTCTGC  CTTATCAACTGTCGATGGTAGG  TTCTGCG  CCTACCATGGTTGTAACGGG  TAA CGGGGAAT  CAGG  GTTCGATTCCG  GAG    A    GGGAGC  CTGAGAAACG  GCTACC  A  CATC  CAAG  GAAG  GCA  GCAGGCGC  GCAAA  TTACCCACTCCCG  GCA  CGGGGAGGTA  G  TGACGAAAA
PT05D_Chalcedectus_sp_D1527_uvxyz                      ---  -----  ---  ---  -  -----  -  -----------  -  --------  -------------  --  ---------------  -------  -----------  ------  ---  ------  --------------------  ------  ----  ----  ---------------  -----  ----------------  ---------  ----------  ----  ----------  ---- -----    --------------  -------------  ------  --------------  ------------------  -----  -----------  ---------  ------  --------  ---  -----------------  ----------------------  -------  --------------------  --- --------  ----  -----------  ---    -    ------  ----------  ------  -  ----  ----  ----  ---  --------  -----  -------------  ---  ----------  -  ---------
PT05C_Cleonymus_sp_D1452_tuvxyz                     TAC  CTGGT  TGA  TCC  T  GCCAG  T  AGTCATATGCT  T  GTCTCAAA  GATTAAGCCATGC  AT  GTCTCAGTGCATGCC  GAATTAA  GGTGAAACCGC  GAATGG  CTC  ATTAAA  TCAGTTATGGTTCCTTAGAT  CGTACC  CACA  TTTA  CTTGGATAACTGTGG  TAATT  CTAGAGCTAATACATG  CAAACTAGA  GTTCCGACCA  GAGA  TGGAAGGAAC  GCTT TTATT    AGATCAAAACCAAT  CGGTGG-CGGGT-  t---cc  -GCTCGT-CCACCG  TTTACCTTGGTGACTCTG  AATAA  CTTTGTGCTGA  TCGCACGGT  CTC-GC  ACCGGCGA  CGC  ATCTTTCAAATGTCTGC  CTTATCAACTGTCGATGGTAGG  TTCTGCG  CCTACCATGGTTGTAACGGG  TAA CGGGGAAT  CAGG  GTTCGATTCCG  GAG    A    GGGAGC  CTGAGAAACG  GCTACC  A  CATC  CAAG  GAAG  GCA  GCAGGCGC  GCAAA  TTACCCACTCCCG  GCA  CGGGGAGGTA  G  TGACGAAAA
PT05C_Dasycleonymus_sp_D2243_uvxyz                  ---  -----  ---  ---  -  -----  -  -----------  -  --------  -------------  --  ---------------  -------  -----------  ------  ---  ------  --------------------  ------  ----  ----  ---------------  -----  ----------------  ---------  ----------  ----  ----------  ---- -----    --------------  -------------  ------  --------------  ------------------  -----  -----------  ---------  ------  --------  ---  -----------------  ----------------------  -------  --------------------  --- --------  ----  -----------  ---    -    ------  ----------  ------  -  ----  ----  ----  ---  --------  -----  -------------  ---  ----------  -  ---------
PT05L_Agamerion_cleptideum_D1016_uvxyz              ---  -----  ---  ---  -  -----  -  -----------  -  --------  -------------  --  ---------------  -------  -----------  ------  ---  ------  --------------------  ------  ----  ----  ---------------  -----  ----------------  ---------  ----------  ----  ----------  ---- -----    --------------  -------------  ------  --------------  ------------------  -----  -----------  ---------  ------  --------  ---  -----------------  ----------------------  -------  --------------------  --- --------  ----  -----------  ---    -    ------  ----------  ------  -  ----  ----  ----  ---  --------  -----  -------------  ---  ----------  -  ---------
PT05L_Epistenia_sp_D0397_uxy                        ---  -----  ---  ---  -  -----  -  -----------  -  --------  -------------  --  ---------------  -------  -----------  ------  ---  ------  --------------------  ------  ----  ----  ---------------  -----  ----------------  ---------  ----------  ----  ----------  ---- -----    --------------  -------------  ------  --------------  ------------------  -----  -----------  ---------  ------  --------  ---  -----------------  ----------------------  -------  --------------------  --- --------  ----  -----------  ---    -    ------  ----------  ------  -  ----  ----  ----  ---  --------  -----  -------------  ---  ----------  -  ---------
PT05L_Lyciscini_ng_D2284_uvxyz                      ---  -----  ---  ---  -  -----  -  -----------  -  --------  -------------  --  ---------------  -------  -----------  ------  ---  ------  --------------------  ------  ----  ----  ---------------  -----  ----------------  ---------  ----------  ----  ----------  ---- -----    --------------  -------------  ------  --------------  ------------------  -----  -----------  ---------  ------  --------  ---  -----------------  ----------------------  -------  --------------------  --- --------  ----  -----------  ---    -    ------  ----------  ------  -  ----  ----  ----  ---  --------  -----  -------------  ---  ----------  -  ---------
PT05L_Parepistenia_sp_D1015_vxyz                    ---  -----  ---  ---  -  -----  -  -----------  -  --------  -------------  --  ---------------  -------  -----------  ------  ---  ------  --------------------  ------  ----  ----  ---------------  -----  ----------------  ---------  ----------  ----  ----------  ---- -----    --------------  -------------  ------  --------------  ------------------  -----  -----------  ---------  ------  --------  ---  -----------------  ----------------------  -------  --------------------  --- --------  ----  -----------  ---    -    ------  ----------  ------  -  ----  ----  ----  ---  --------  -----  -------------  ---  ----------  -  ---------
PT05L_Proshizonotus_sp_D2063_xyz                    ---  -----  ---  ---  -  -----  -  -----------  -  --------  -------------  --  ---------------  -------  -----------  ------  ---  ------  --------------------  ------  ----  ----  ---------------  -----  ----------------  ---------  ----------  ----  ----------  ---- -----    --------------  -------------  ------  --------------  ------------------  -----  -----------  ---------  ------  --------  ---  -----------------  ----------------------  -------  --------------------  --- --------  ----  -----------  ---    -    ------  ----------  ------  -  ----  ----  ----  ---  --------  -----  -------------  ---  ----------  -  ---------
PT05O_Oodera_sp_D1792_tuxyz                         TAC  CTGGT  TGA  TCC  T  GCCAG  T  AGTCATATGCT  T  GTCTCAAA  GATTAAGCCATGC  AT  GTTTCAGTGCATGCC  GAATTAA  GGTGAAACCGC  GAATGG  CTC  ATTAAA  TCAGTTATGGTTCCTTAGAT  CGTACC  CACA  TTTA  CTTGGATAACTGTGG  TAATT  CTAGAGCTAATACATG  CAAACTAGA  GTTCCGACCA  GAGA  TGGAAGGAAC  GCTT TTATT    AGATCAAAACCAAT  CGGTGG-CGGG--  tt--cg  --CTCGT-CCACCG  TTTACCTTGGTGACTCTG  AATAA  CTTTGTGCTGA  TCGCACGGT  CTC-GC  ACCGGCGA  CGC  ATCTTTCAAATGTCTGC  CTTATCAACTTACGATGGTAGG  TTCTGCG  CCTACCATGGTTGTAACGGG  TAA CGGGGAAT  CAGG  GTTCGATTCCG  GAG    A    GGGAGC  CTGAGAAACG  GCTACC  A  CATC  CAAG  GAAG  GCA  GCAGGCGC  GCAAA  TTACCCACTCCCG  GCA  CGGGGAGGTA  G  TGACGAAAA
PT06_Cecidellis_sp_D2249_uvxyz                      ---  -----  ---  ---  -  -----  -  -----------  -  --------  -------------  --  ---------------  -------  -----------  ------  ---  ------  --------------------  ------  ----  ----  ---------------  -----  ----------------  ---------  ----------  ----  ----------  ---- -----    --------------  -------------  ------  --------------  ------------------  -----  -----------  ---------  ------  --------  ---  -----------------  ----------------------  -------  --------------------  --- --------  ----  -----------  ---    -    ------  ----------  ------  -  ----  ----  ----  ---  --------  -----  -------------  ---  ----------  -  ---------
PT06_Lanthanomyia_D2193_uxyz                        ---  -----  ---  ---  -  -----  -  -----------  -  --------  -------------  --  ---------------  -------  -----------  ------  ---  ------  --------------------  ------  ----  ----  ---------------  -----  ----------------  ---------  ----------  ----  ----------  ---- -----    --------------  -------------  ------  --------------  ------------------  -----  -----------  ---------  ------  --------  ---  -----------------  ----------------------  -------  --------------------  --- --------  ----  -----------  ---    -    ------  ----------  ------  -  ----  ----  ----  ---  --------  -----  -------------  ---  ----------  -  ---------
PT06_Ormyromorpha_sp_D1863_uxyz                     ---  -----  ---  ---  -  -----  -  -----------  -  --------  -------------  --  ---------------  -------  -----------  ------  ---  ------  --------------------  ------  ----  ----  ---------------  -----  ----------------  ---------  ----------  ----  ----------  ---- -----    --------------  -------------  ------  --------------  ------------------  -----  -----------  ---------  ------  --------  ---  -----------------  ----------------------  -------  --------------------  --- --------  ----  -----------  ---    -    ------  ----------  ------  -  ----  ----  ----  ---  --------  -----  -------------  ---  ----------  -  ---------
PT06_Yrka_sp_D1485_uxyz                             ---  -----  ---  ---  -  -----  -  -----------  -  --------  -------------  --  ---------------  -------  -----------  ------  ---  ------  --------------------  ------  ----  ----  ---------------  -----  ----------------  ---------  ----------  ----  ----------  ---- -----    --------------  -------------  ------  --------------  ------------------  -----  -----------  ---------  ------  --------  ---  -----------------  ----------------------  -------  --------------------  --- --------  ----  -----------  ---    -    ------  ----------  ------  -  ----  ----  ----  ---  --------  -----  -------------  ---  ----------  -  ---------
PT07_Colotrechnus_ignotus_D1976uxyz                 ---  -----  ---  ---  -  -----  -  -----------  -  --------  -------------  --  ---------------  -------  -----------  ------  ---  ------  --------------------  ------  ----  ----  ---------------  -----  ----------------  ---------  ----------  ----  ----------  ---- -----    --------------  -------------  ------  --------------  ------------------  -----  -----------  ---------  ------  --------  ---  -----------------  ----------------------  -------  --------------------  --- --------  ----  -----------  ---    -    ------  ----------  ------  -  ----  ----  ----  ---  --------  -----  -------------  ---  ----------  -  ---------
PT07_Hetreulophus_sp_D1450_vxyz                     ---  -----  ---  ---  -  -----  -  -----------  -  --------  -------------  --  ---------------  -------  -----------  ------  ---  ------  --------------------  ------  ----  ----  ---------------  -----  ----------------  ---------  ----------  ----  ----------  ---- -----    --------------  -------------  ------  --------------  ------------------  -----  -----------  ---------  ------  --------  ---  -----------------  ----------------------  -------  --------------------  --- --------  ----  -----------  ---    -    ------  ----------  ------  -  ----  ----  ----  ---  --------  -----  -------------  ---  ----------  -  ---------
PT08_Cratomus_megacephalus_D1862_uxyz               ---  -----  ---  ---  -  -----  -  -----------  -  --------  -------------  --  ---------------  -------  -----------  ------  ---  ------  --------------------  ------  ----  ----  ---------------  -----  ----------------  ---------  ----------  ----  ----------  ---- -----    --------------  -------------  ------  --------------  ------------------  -----  -----------  ---------  ------  --------  ---  -----------------  ----------------------  -------  --------------------  --- --------  ----  -----------  ---    -    ------  ----------  ------  -  ----  ----  ----  ---  --------  -----  -------------  ---  ----------  -  ---------
PT09D_Dipara_sp_D1552_uxyz                          ---  -----  ---  ---  -  -----  -  -----------  -  --------  -------------  --  ---------------  -------  -----------  ------  ---  ------  --------------------  ------  ----  ----  ---------------  -----  ----------------  ---------  ----------  ----  ----------  ---- -----    --------------  -------------  ------  --------------  ------------------  -----  -----------  ---------  ------  --------  ---  -----------------  ----------------------  -------  --------------------  --- --------  ----  -----------  ---    -    ------  ----------  ------  -  ----  ----  ----  ---  --------  -----  -------------  ---  ----------  -  ---------
PT09D_Lelaps_sp_D1493_uvxy                          ---  -----  ---  ---  -  -----  -  -----------  -  --------  -------------  --  ---------------  -------  -----------  ------  ---  ------  --------------------  ------  ----  ----  ---------------  -----  ----------------  ---------  ----------  ----  ----------  ---- -----    --------------  -------------  ------  --------------  ------------------  -----  -----------  ---------  ------  --------  ---  -----------------  ----------------------  -------  --------------------  --- --------  ----  -----------  ---    -    ------  ----------  ------  -  ----  ----  ----  ---  --------  -----  -------------  ---  ----------  -  ---------
PT09D_Netomocera_sp_D2017_tuxyz                     TAC  CTGGT  TGA  TCC  T  GCCAG  T  GGTCATATGCT  T  GTCTCAAA  GATTAAGCCATGC  AT  GTCTCAGTGCATGCC  GAATTAA  GGTGAAACCGC  GAATGG  CTC  ATTAAA  TCAGTTATGGTTCCTTAGAT  CGTACC  CACA  TTTA  CTTGGATAACTGTGG  TAATT  CTAGAGCTAATACATG  CAAACCAGA  GTTCCGACCG  GAGA  CGGAAGGAAC  GCTT TTATT    AGATCAAAACCAAT  CGGTGG-CTTGT-  ta--ac  -GCTTGTCCCACCG  TTTACCTTGGTGACTCTG  AATAA  CTTTGTGCTGA  TCGCACGGT  CTC-GC  ACCGGCGA  CGC  ATCTTTCAAATGTCTGC  CTTATCAACTGTCGATGGTAGG  TTCTGCG  CCTACCATGGTTGTAACGGG  TAA CGGGGAAT  CAGG  GTTCGATTCCG  GAG    A    GGGAGC  CTGAGAAACG  GCTACC  A  CATC  CAAG  GAAG  GCA  GCAGGCGC  GCAAA  TTACCCACTCCCG  GCA  CGGGGAGGTA  G  TGACGAAAA
PT09I_Dipara_sp_D2695_vxyz                          ---  -----  ---  ---  -  -----  -  -----------  -  --------  -------------  --  ---------------  -------  -----------  ------  ---  ------  --------------------  ------  ----  ----  ---------------  -----  ----------------  ---------  ----------  ----  ----------  ---- -----    --------------  -------------  ------  --------------  ------------------  -----  -----------  ---------  ------  --------  ---  -----------------  ----------------------  -------  --------------------  --- --------  ----  -----------  ---    -    ------  ----------  ------  -  ----  ----  ----  ---  --------  -----  -------------  ---  ----------  -  ---------
PT09N_Neapterolelaps_sp1_D2078_uvxyz                ---  -----  ---  ---  -  -----  -  -----------  -  --------  -------------  --  ---------------  -------  -----------  ------  ---  ------  --------------------  ------  ----  ----  ---------------  -----  ----------------  ---------  ----------  ----  ----------  ---- -----    --------------  -------------  ------  --------------  ------------------  -----  -----------  ---------  ------  --------  ---  -----------------  ----------------------  -------  --------------------  --- --------  ----  -----------  ---    -    ------  ----------  ------  -  ----  ----  ----  ---  --------  -----  -------------  ---  ----------  -  ---------
PT09N_Neapterolelaps_sp2_D2076_vxyz                 ---  -----  ---  ---  -  -----  -  -----------  -  --------  -------------  --  ---------------  -------  -----------  ------  ---  ------  --------------------  ------  ----  ----  ---------------  -----  ----------------  ---------  ----------  ----  ----------  ---- -----    --------------  -------------  ------  --------------  ------------------  -----  -----------  ---------  ------  --------  ---  -----------------  ----------------------  -------  --------------------  --- --------  ----  -----------  ---    -    ------  ----------  ------  -  ----  ----  ----  ---  --------  -----  -------------  ---  ----------  -  ---------
PT10_Acophila_mikii_R2388_02_uxyz                   ---  -----  ---  ---  -  -----  -  -----------  -  --------  -------------  --  ---------------  -------  -----------  ------  ---  ------  --------------------  ------  ----  ----  ---------------  -----  ----------------  ---------  ----------  ----  ----------  ---- -----    --------------  -------------  ------  --------------  ------------------  -----  -----------  ---------  ------  --------  ---  -----------------  ----------------------  -------  --------------------  --- --------  ----  -----------  ---    -    ------  ----------  ------  -  ----  ----  ----  ---  --------  -----  -------------  ---  ----------  -  ---------
PT10_Acophila_sp_R1616_01_uxyz                      ---  -----  ---  ---  -  -----  -  -----------  -  --------  -------------  --  ---------------  -------  -----------  ------  ---  ------  --------------------  ------  ----  ----  ---------------  -----  ----------------  ---------  ----------  ----  ----------  ---- -----    --------------  -------------  ------  --------------  ------------------  -----  -----------  ---------  ------  --------  ---  -----------------  ----------------------  -------  --------------------  --- --------  ----  -----------  ---    -    ------  ----------  ------  -  ----  ----  ----  ---  --------  -----  -------------  ---  ----------  -  ---------
PT10_Camarothorax_sp1_R1620_02_uxyz                 ---  -----  ---  ---  -  -----  -  -----------  -  --------  -------------  --  ---------------  -------  -----------  ------  ---  ------  --------------------  ------  ----  ----  ---------------  -----  ----------------  ---------  ----------  ----  ----------  ---- -----    --------------  -------------  ------  --------------  ------------------  -----  -----------  ---------  ------  --------  ---  -----------------  ----------------------  -------  --------------------  --- --------  ----  -----------  ---    -    ------  ----------  ------  -  ----  ----  ----  ---  --------  -----  -------------  ---  ----------  -  ---------
PT10_Camarothorax_sp2_R2384_02_uxyz                 ---  -----  ---  ---  -  -----  -  -----------  -  --------  -------------  --  ---------------  -------  -----------  ------  ---  ------  --------------------  ------  ----  ----  ---------------  -----  ----------------  ---------  ----------  ----  ----------  ---- -----    --------------  -------------  ------  --------------  ------------------  -----  -----------  ---------  ------  --------  ---  -----------------  ----------------------  -------  --------------------  --- --------  ----  -----------  ---    -    ------  ----------  ------  -  ----  ----  ----  ---  --------  -----  -------------  ---  ----------  -  ---------
PT10_Camarothorax_sp3_R1227_01_uxyz                 ---  -----  ---  ---  -  -----  -  -----------  -  --------  -------------  --  ---------------  -------  -----------  ------  ---  ------  --------------------  ------  ----  ----  ---------------  -----  ----------------  ---------  ----------  ----  ----------  ---- -----    --------------  -------------  ------  --------------  ------------------  -----  -----------  ---------  ------  --------  ---  -----------------  ----------------------  -------  --------------------  --- --------  ----  -----------  ---    -    ------  ----------  ------  -  ----  ----  ----  ---  --------  -----  -------------  ---  ----------  -  ---------
PT10_Epichrysomalla_sp1_R2082_06_uxyz               ---  -----  ---  ---  -  -----  -  -----------  -  --------  -------------  --  ---------------  -------  -----------  ------  ---  ------  --------------------  ------  ----  ----  ---------------  -----  ----------------  ---------  ----------  ----  ----------  ---- -----    --------------  -------------  ------  --------------  ------------------  -----  -----------  ---------  ------  --------  ---  -----------------  ----------------------  -------  --------------------  --- --------  ----  -----------  ---    -    ------  ----------  ------  -  ----  ----  ----  ---  --------  -----  -------------  ---  ----------  -  ---------
PT10_Epichrysomalla_sp2_R2337_02_uxyz               ---  -----  ---  ---  -  -----  -  -----------  -  --------  -------------  --  ---------------  -------  -----------  ------  ---  ------  --------------------  ------  ----  ----  ---------------  -----  ----------------  ---------  ----------  ----  ----------  ---- -----    --------------  -------------  ------  --------------  ------------------  -----  -----------  ---------  ------  --------  ---  -----------------  ----------------------  -------  --------------------  --- --------  ----  -----------  ---    -    ------  ----------  ------  -  ----  ----  ----  ---  --------  -----  -------------  ---  ----------  -  ---------
PT10_Epichrysomalla_sp3_R2349_02_uxyz               ---  -----  ---  ---  -  -----  -  -----------  -  --------  -------------  --  ---------------  -------  -----------  ------  ---  ------  --------------------  ------  ----  ----  ---------------  -----  ----------------  ---------  ----------  ----  ----------  ---- -----    --------------  -------------  ------  --------------  ------------------  -----  -----------  ---------  ------  --------  ---  -----------------  ----------------------  -------  --------------------  --- --------  ----  -----------  ---    -    ------  ----------  ------  -  ----  ----  ----  ---  --------  -----  -------------  ---  ----------  -  ---------
PT10_Epichrysomallinae_ng1_R2059_03_3i_uxz          ---  -----  ---  ---  -  -----  -  -----------  -  --------  -------------  --  ---------------  -------  -----------  ------  ---  ------  --------------------  ------  ----  ----  ---------------  -----  ----------------  ---------  ----------  ----  ----------  ---- -----    --------------  -------------  ------  --------------  ------------------  -----  -----------  ---------  ------  --------  ---  -----------------  ----------------------  -------  --------------------  --- --------  ----  -----------  ---    -    ------  ----------  ------  -  ----  ----  ----  ---  --------  -----  -------------  ---  ----------  -  ---------
PT10_Epichrysomallinae_ng1_R2059_03a_uxyz           ---  -----  ---  ---  -  -----  -  -----------  -  --------  -------------  --  ---------------  -------  -----------  ------  ---  ------  --------------------  ------  ----  ----  ---------------  -----  ----------------  ---------  ----------  ----  ----------  ---- -----    --------------  -------------  ------  --------------  ------------------  -----  -----------  ---------  ------  --------  ---  -----------------  ----------------------  -------  --------------------  --- --------  ----  -----------  ---    -    ------  ----------  ------  -  ----  ----  ----  ---  --------  -----  -------------  ---  ----------  -  ---------
PT10_Epichrysomallinae_ng2_R2085_04_uxyz            ---  -----  ---  ---  -  -----  -  -----------  -  --------  -------------  --  ---------------  -------  -----------  ------  ---  ------  --------------------  ------  ----  ----  ---------------  -----  ----------------  ---------  ----------  ----  ----------  ---- -----    --------------  -------------  ------  --------------  ------------------  -----  -----------  ---------  ------  --------  ---  -----------------  ----------------------  -------  --------------------  --- --------  ----  -----------  ---    -    ------  ----------  ------  -  ----  ----  ----  ---  --------  -----  -------------  ---  ----------  -  ---------
PT10_Epichrysomallinae_ng2_R1222_18_uxyz            ---  -----  ---  ---  -  -----  -  -----------  -  --------  -------------  --  ---------------  -------  -----------  ------  ---  ------  --------------------  ------  ----  ----  ---------------  -----  ----------------  ---------  ----------  ----  ----------  ---- -----    --------------  -------------  ------  --------------  ------------------  -----  -----------  ---------  ------  --------  ---  -----------------  ----------------------  -------  --------------------  --- --------  ----  -----------  ---    -    ------  ----------  ------  -  ----  ----  ----  ---  --------  -----  -------------  ---  ----------  -  ---------
PT10_Epichrysomallinae_ng2_R1222_17_uxyz            ---  -----  ---  ---  -  -----  -  -----------  -  --------  -------------  --  ---------------  -------  -----------  ------  ---  ------  --------------------  ------  ----  ----  ---------------  -----  ----------------  ---------  ----------  ----  ----------  ---- -----    --------------  -------------  ------  --------------  ------------------  -----  -----------  ---------  ------  --------  ---  -----------------  ----------------------  -------  --------------------  --- --------  ----  -----------  ---    -    ------  ----------  ------  -  ----  ----  ----  ---  --------  -----  -------------  ---  ----------  -  ---------
PT10_Epichrysomallinae_ng1_R1222_19_uxyz            ---  -----  ---  ---  -  -----  -  -----------  -  --------  -------------  --  ---------------  -------  -----------  ------  ---  ------  --------------------  ------  ----  ----  ---------------  -----  ----------------  ---------  ----------  ----  ----------  ---- -----    --------------  -------------  ------  --------------  ------------------  -----  -----------  ---------  ------  --------  ---  -----------------  ----------------------  -------  --------------------  --- --------  ----  -----------  ---    -    ------  ----------  ------  -  ----  ----  ----  ---  --------  -----  -------------  ---  ----------  -  ---------
PT10_Eufroggattisca_sp_R1618_01_uxyz                ---  -----  ---  ---  -  -----  -  -----------  -  --------  -------------  --  ---------------  -------  -----------  ------  ---  ------  --------------------  ------  ----  ----  ---------------  -----  ----------------  ---------  ----------  ----  ----------  ---- -----    --------------  -------------  ------  --------------  ------------------  -----  -----------  ---------  ------  --------  ---  -----------------  ----------------------  -------  --------------------  --- --------  ----  -----------  ---    -    ------  ----------  ------  -  ----  ----  ----  ---  --------  -----  -------------  ---  ----------  -  ---------
PT10_Herodotia_sp_R2529_02a_uxyz                    ---  -----  ---  ---  -  -----  -  -----------  -  --------  -------------  --  ---------------  -------  -----------  ------  ---  ------  --------------------  ------  ----  ----  ---------------  -----  ----------------  ---------  ----------  ----  ----------  ---- -----    --------------  -------------  ------  --------------  ------------------  -----  -----------  ---------  ------  --------  ---  -----------------  ----------------------  -------  --------------------  --- --------  ----  -----------  ---    -    ------  ----------  ------  -  ----  ----  ----  ---  --------  -----  -------------  ---  ----------  -  ---------
PT10_Acophila_sp_R1820_05_uxyz                      ---  -----  ---  ---  -  -----  -  -----------  -  --------  -------------  --  ---------------  -------  -----------  ------  ---  ------  --------------------  ------  ----  ----  ---------------  -----  ----------------  ---------  ----------  ----  ----------  ---- -----    --------------  -------------  ------  --------------  ------------------  -----  -----------  ---------  ------  --------  ---  -----------------  ----------------------  -------  --------------------  --- --------  ----  -----------  ---    -    ------  ----------  ------  -  ----  ----  ----  ---  --------  -----  -------------  ---  ----------  -  ---------
PT10_Lachaisea_sp2_R2192_04_uxyz                    ---  -----  ---  ---  -  -----  -  -----------  -  --------  -------------  --  ---------------  -------  -----------  ------  ---  ------  --------------------  ------  ----  ----  ---------------  -----  ----------------  ---------  ----------  ----  ----------  ---- -----    --------------  -------------  ------  --------------  ------------------  -----  -----------  ---------  ------  --------  ---  -----------------  ----------------------  -------  --------------------  --- --------  ----  -----------  ---    -    ------  ----------  ------  -  ----  ----  ----  ---  --------  -----  -------------  ---  ----------  -  ---------
PT10_Meselatus_bicolor_R2446_01a_uxyz               ---  -----  ---  ---  -  -----  -  -----------  -  --------  -------------  --  ---------------  -------  -----------  ------  ---  ------  --------------------  ------  ----  ----  ---------------  -----  ----------------  ---------  ----------  ----  ----------  ---- -----    --------------  -------------  ------  --------------  ------------------  -----  -----------  ---------  ------  --------  ---  -----------------  ----------------------  -------  --------------------  --- --------  ----  -----------  ---    -    ------  ----------  ------  -  ----  ----  ----  ---  --------  -----  -------------  ---  ----------  -  ---------
PT10_Neosycophila_sp1_R1614_01_uxyz                 ---  -----  ---  ---  -  -----  -  -----------  -  --------  -------------  --  ---------------  -------  -----------  ------  ---  ------  --------------------  ------  ----  ----  ---------------  -----  ----------------  ---------  ----------  ----  ----------  ---- -----    --------------  -------------  ------  --------------  ------------------  -----  -----------  ---------  ------  --------  ---  -----------------  ----------------------  -------  --------------------  --- --------  ----  -----------  ---    -    ------  ----------  ------  -  ----  ----  ----  ---  --------  -----  -------------  ---  ----------  -  ---------
PT10_Neosycophila_sp2_R2445_02_uxyz                 ---  -----  ---  ---  -  -----  -  -----------  -  --------  -------------  --  ---------------  -------  -----------  ------  ---  ------  --------------------  ------  ----  ----  ---------------  -----  ----------------  ---------  ----------  ----  ----------  ---- -----    --------------  -------------  ------  --------------  ------------------  -----  -----------  ---------  ------  --------  ---  -----------------  ----------------------  -------  --------------------  --- --------  ----  -----------  ---    -    ------  ----------  ------  -  ----  ----  ----  ---  --------  -----  -------------  ---  ----------  -  ---------
PT10_Neosycophila_sp3_R2504_02_1i_uxyz              ---  -----  ---  ---  -  -----  -  -----------  -  --------  -------------  --  ---------------  -------  -----------  ------  ---  ------  --------------------  ------  ----  ----  ---------------  -----  ----------------  ---------  ----------  ----  ----------  ---- -----    --------------  -------------  ------  --------------  ------------------  -----  -----------  ---------  ------  --------  ---  -----------------  ----------------------  -------  --------------------  --- --------  ----  -----------  ---    -    ------  ----------  ------  -  ----  ----  ----  ---  --------  -----  -------------  ---  ----------  -  ---------
PT10_Neosycophila_sp4_R2291_02_uxyz                 ---  -----  ---  ---  -  -----  -  -----------  -  --------  -------------  --  ---------------  -------  -----------  ------  ---  ------  --------------------  ------  ----  ----  ---------------  -----  ----------------  ---------  ----------  ----  ----------  ---- -----    --------------  -------------  ------  --------------  ------------------  -----  -----------  ---------  ------  --------  ---  -----------------  ----------------------  -------  --------------------  --- --------  ----  -----------  ---    -    ------  ----------  ------  -  ----  ----  ----  ---  --------  -----  -------------  ---  ----------  -  ---------
PT10_Neosycophila_sp5_R1215_15_uxyz                 ---  -----  ---  ---  -  -----  -  -----------  -  --------  -------------  --  ---------------  -------  -----------  ------  ---  ------  --------------------  ------  ----  ----  ---------------  -----  ----------------  ---------  ----------  ----  ----------  ---- -----    --------------  -------------  ------  --------------  ------------------  -----  -----------  ---------  ------  --------  ---  -----------------  ----------------------  -------  --------------------  --- --------  ----  -----------  ---    -    ------  ----------  ------  -  ----  ----  ----  ---  --------  -----  -------------  ---  ----------  -  ---------
PT10_Sycobia_sp_R2034_02_uxyz                       ---  -----  ---  ---  -  -----  -  -----------  -  --------  -------------  --  ---------------  -------  -----------  ------  ---  ------  --------------------  ------  ----  ----  ---------------  -----  ----------------  ---------  ----------  ----  ----------  ---- -----    --------------  -------------  ------  --------------  ------------------  -----  -----------  ---------  ------  --------  ---  -----------------  ----------------------  -------  --------------------  --- --------  ----  -----------  ---    -    ------  ----------  ------  -  ----  ----  ----  ---  --------  -----  -------------  ---  ----------  -  ---------
PT10_Sycotetra_sp_R2248_06a_uxyz                    ---  -----  ---  ---  -  -----  -  -----------  -  --------  -------------  --  ---------------  -------  -----------  ------  ---  ------  --------------------  ------  ----  ----  ---------------  -----  ----------------  ---------  ----------  ----  ----------  ---- -----    --------------  -------------  ------  --------------  ------------------  -----  -----------  ---------  ------  --------  ---  -----------------  ----------------------  -------  --------------------  --- --------  ----  -----------  ---    -    ------  ----------  ------  -  ----  ----  ----  ---  --------  -----  -------------  ---  ----------  -  ---------
PT11E_Cephaleta_sp_D2638_uvxyz                      ---  -----  ---  ---  -  -----  -  -----------  -  --------  -------------  --  ---------------  -------  -----------  ------  ---  ------  --------------------  ------  ----  ----  ---------------  -----  ----------------  ---------  ----------  ----  ----------  ---- -----    --------------  -------------  ------  --------------  ------------------  -----  -----------  ---------  ------  --------  ---  -----------------  ----------------------  -------  --------------------  --- --------  ----  -----------  ---    -    ------  ----------  ------  -  ----  ----  ----  ---  --------  -----  -------------  ---  ----------  -  ---------
PT11E_Eunotus_sp1_D1032_uvxy                        ---  -----  ---  ---  -  -----  -  -----------  -  --------  -------------  --  ---------------  -------  -----------  ------  ---  ------  --------------------  ------  ----  ----  ---------------  -----  ----------------  ---------  ----------  ----  ----------  ---- -----    --------------  -------------  ------  --------------  ------------------  -----  -----------  ---------  ------  --------  ---  -----------------  ----------------------  -------  --------------------  --- --------  ----  -----------  ---    -    ------  ----------  ------  -  ----  ----  ----  ---  --------  -----  -------------  ---  ----------  -  ---------
PT11E_Eunotus_sp2_D2111_vxyz                        ---  -----  ---  ---  -  -----  -  -----------  -  --------  -------------  --  ---------------  -------  -----------  ------  ---  ------  --------------------  ------  ----  ----  ---------------  -----  ----------------  ---------  ----------  ----  ----------  ---- -----    --------------  -------------  ------  --------------  ------------------  -----  -----------  ---------  ------  --------  ---  -----------------  ----------------------  -------  --------------------  --- --------  ----  -----------  ---    -    ------  ----------  ------  -  ----  ----  ----  ---  --------  -----  -------------  ---  ----------  -  ---------
PT11E_Idioporus_affinis_D0142_tuvxyz                TAC  CTGGT  TGA  TCC  T  GCCAG  T  AGTCATATGCT  T  GTCTCAAA  GATTAAGCCATGC  AT  GTCTCAGTGCATGCC  AAATTAA  GGTGAAACCGC  GAATGG  CTC  ATTAAA  TCAGTTATGGTTCCTTAGAT  CGTACC  CACA  TTTA  CTTGGATAACTGTGG  TAATT  CTAGAGCTAATACATG  CAAACCAGA  GTTCCGACCA  GAGA  TGGAAGGAAC  GCTT TTATT    AGATCAAAACCAAT  CGGTGGACGGG--  ct--tg  --CTCGT-CTATCG  TTTACCTTGGTGACTCTG  AATAA  CTTTGTGCTGA  TCGCACGGT  CTT-GC  ACCGGCGA  CGC  ATCTTTCAAATGTCTGC  CTTATCAACTGTCGATGGTAGG  TTCTGCG  CCTACCATGGTTGTAACGGG  TAA CGGGGAAT  CAGG  GTTCGATTCCG  GAG    A    GGGAGC  CTGAGAAACG  GCTACC  A  CATC  CAAG  GAAG  GCA  GCAGGCGC  GCAAA  TTACCCACTCCCG  GCA  CGGGGAGGTA  G  TGACGAAAA
PT11E_Scutellista_caerulea_D0012_uxy                ---  -----  ---  ---  -  -----  -  -----------  -  --------  -------------  --  ---------------  -------  -----------  ------  ---  ------  --------------------  ------  ----  ----  ---------------  -----  ----------------  ---------  ----------  ----  ----------  ---- -----    --------------  -------------  ------  --------------  ------------------  -----  -----------  ---------  ------  --------  ---  -----------------  ----------------------  -------  --------------------  --- --------  ----  -----------  ---    -    ------  ----------  ------  -  ----  ----  ----  ---  --------  -----  -------------  ---  ----------  -  ---------
PT11M_Moranila_sp_D1524_uvxyz                       ---  -----  ---  ---  -  -----  -  -----------  -  --------  -------------  --  ---------------  -------  -----------  ------  ---  ------  --------------------  ------  ----  ----  ---------------  -----  ----------------  ---------  ----------  ----  ----------  ---- -----    --------------  -------------  ------  --------------  ------------------  -----  -----------  ---------  ------  --------  ---  -----------------  ----------------------  -------  --------------------  --- --------  ----  -----------  ---    -    ------  ----------  ------  -  ----  ----  ----  ---  --------  -----  -------------  ---  ----------  -  ---------
PT11T_Tomocerodes_sp_D2640_vxyz                     ---  -----  ---  ---  -  -----  -  -----------  -  --------  -------------  --  ---------------  -------  -----------  ------  ---  ------  --------------------  ------  ----  ----  ---------------  -----  ----------------  ---------  ----------  ----  ----------  ---- -----    --------------  -------------  ------  --------------  ------------------  -----  -----------  ---------  ------  --------  ---  -----------------  ----------------------  -------  --------------------  --- --------  ----  -----------  ---    -    ------  ----------  ------  -  ----  ----  ----  ---  --------  -----  -------------  ---  ----------  -  ---------
PT12_Eutrichosoma_mirabile_D0262_uxyz               ---  -----  ---  ---  -  -----  -  -----------  -  --------  -------------  --  ---------------  -------  -----------  ------  ---  ------  --------------------  ------  ----  ----  ---------------  -----  ----------------  ---------  ----------  ----  ----------  ---- -----    --------------  -------------  ------  --------------  ------------------  -----  -----------  ---------  ------  --------  ---  -----------------  ----------------------  -------  --------------------  --- --------  ----  -----------  ---    -    ------  ----------  ------  -  ----  ----  ----  ---  --------  -----  -------------  ---  ----------  -  ---------
PT13_Herbertia_sp_D1981_tuvxyz                      TAC  CTGGT  TGA  TCC  T  GCCAG  T  AGTCATATGCT  T  GTCTCAAA  GATTAAGCCATGC  AT  GTCTCAGTGCATGCC  GAATTAA  GGTGAAACCGC  GAATGG  CTC  ATTAAA  TCAGTTATGGTTCCTTAGAT  CGTACC  CACA  TTTA  CTTGGATAACTGTGG  TAATT  CTAGAGCTAATACATG  CAAACCAGA  GTTCCGACCA  GAGA  TGGAAGGAAC  GCTT TTATT    AGATCAAAACCAAT  CGGTGG-CGGG--  tt--cg  --CTCGT-CCACCG  TTTACCTTGGTGACTCTG  AATAA  CTTTGTGCTGA  TCGCACGGT  CTC-GT  ACCGGCGA  CGC  ATCTTTCAAATGTCTGC  CTTATCAACTGTCGATGGTAGG  TTCTGCG  CCTACCATGGTTGTAACGGG  TAA CGGGGAAT  CAGG  GTTCGATTCCG  GAG    A    GGGAGC  CTGAGAAACG  GCTACC  A  CATC  CAAG  GAAG  GCA  GCAGGCGC  GCAAA  TTACCCACTCCCG  GCA  CGGGGAGGTA  G  TGACGAAAA
PT14_Doddifoenus_wallacei_D2051_uxyz                ---  -----  ---  ---  -  -----  -  -----------  -  --------  -------------  --  ---------------  -------  -----------  ------  ---  ------  --------------------  ------  ----  ----  ---------------  -----  ----------------  ---------  ----------  ----  ----------  ---- -----    --------------  -------------  ------  --------------  ------------------  -----  -----------  ---------  ------  --------  ---  -----------------  ----------------------  -------  --------------------  --- --------  ----  -----------  ---    -    ------  ----------  ------  -  ----  ----  ----  ---  --------  -----  -------------  ---  ----------  -  ---------
PT14_Leptofoenus_sp1_D0393_uxyz                     ---  -----  ---  ---  -  -----  -  -----------  -  --------  -------------  --  ---------------  -------  -----------  ------  ---  ------  --------------------  ------  ----  ----  ---------------  -----  ----------------  ---------  ----------  ----  ----------  ---- -----    --------------  -------------  ------  --------------  ------------------  -----  -----------  ---------  ------  --------  ---  -----------------  ----------------------  -------  --------------------  --- --------  ----  -----------  ---    -    ------  ----------  ------  -  ----  ----  ----  ---  --------  -----  -------------  ---  ----------  -  ---------
PT14_Leptofoenus_sp2_D0398_uCxyz                    ---  -----  ---  ---  -  -----  -  -----------  -  --------  -------------  --  ---------------  -------  -----------  ------  ---  ------  --------------------  ------  ----  ----  ---------------  -----  ----------------  ---------  ----------  ----  ----------  ---- -----    --------------  -------------  ------  --------------  ------------------  -----  -----------  ---------  ------  --------  ---  -----------------  ----------------------  -------  --------------------  --- --------  ----  -----------  ---    -    ------  ----------  ------  -  ----  ----  ----  ---  --------  -----  -------------  ---  ----------  -  ---------
PT15_Macromesus_americanus_D1901_tuvxyz             TAC  CTGGT  TGA  TCC  T  GCCAG  T  AGTCATATGCT  T  GTCTCAAA  GATTAAGCCATGC  AT  GTCTCAGTGCATGCC  GAATTAA  GGTGAAACCGC  GAATGG  CTC  ATTAAA  TCAGTTATGGTTCCTTAGAT  CGTACC  CACA  TTTA  CTTGGATAACTGTGG  TAATT  CTAGAGCTAATACATG  CAAACCAGA  GTTCCGACCA  GAGA  TGGAAGGAAC  GCTT TTATT    AGATCAAAACCAAT  CGGTGG-CGGGC-  gc--aa  -GCCCGT-TTACCG  TTTACCTTGGTGACTCTG  AATAA  CTTTGTGCTGA  TCGCACGGT  CTC-GC  ACCGGCGA  CGC  ATCTTTCAAATGTCTGC  CTTATCAACTGTCGATGGTAGG  TTCTGCG  CCTACCATGGTTGTAACGGG  TAA CGGGGAAT  CAGG  GTTCGATTCCG  GAG    A    GGGAGC  CTGAGAAACG  GCTACC  A  CATC  CAAG  GAAG  GCA  GCAGGCGC  GCAAA  TTACCCACTCCCG  GCA  CGGGGAGGTA  G  TGACGAAAA
PT16M_Halticoptera_laevigata_R1314_18_uxyz          ---  -----  ---  ---  -  -----  -  -----------  -  --------  -------------  --  ---------------  -------  -----------  ------  ---  ------  --------------------  ------  ----  ----  ---------------  -----  ----------------  ---------  ----------  ----  ----------  ---- -----    --------------  -------------  ------  --------------  ------------------  -----  -----------  ---------  ------  --------  ---  -----------------  ----------------------  -------  --------------------  --- --------  ----  -----------  ---    -    ------  ----------  ------  -  ----  ----  ----  ---  --------  -----  -------------  ---  ----------  -  ---------
PT16M_Lamprotatus_sp_D1525_uvxyz                    ---  -----  ---  ---  -  -----  -  -----------  -  --------  -------------  --  ---------------  -------  -----------  ------  ---  ------  --------------------  ------  ----  ----  ---------------  -----  ----------------  ---------  ----------  ----  ----------  ---- -----    --------------  -------------  ------  --------------  ------------------  -----  -----------  ---------  ------  --------  ---  -----------------  ----------------------  -------  --------------------  --- --------  ----  -----------  ---    -    ------  ----------  ------  -  ----  ----  ----  ---  --------  -----  -------------  ---  ----------  -  ---------
PT16M_Lamprotatus_splendens_R1314_03_uxyz           ---  -----  ---  ---  -  -----  -  -----------  -  --------  -------------  --  ---------------  -------  -----------  ------  ---  ------  --------------------  ------  ----  ----  ---------------  -----  ----------------  ---------  ----------  ----  ----------  ---- -----    --------------  -------------  ------  --------------  ------------------  -----  -----------  ---------  ------  --------  ---  -----------------  ----------------------  -------  --------------------  --- --------  ----  -----------  ---    -    ------  ----------  ------  -  ----  ----  ----  ---  --------  -----  -------------  ---  ----------  -  ---------
PT16M_Sphaeripalpus_sp_D2163_txyz                   ---  -----  ---  ---  -  -----  -  -----------  -  ---TCAAA  GATTAAGCCATGC  AT  GTCTCAGTGCATGCC  GAATTAA  GGTGAAACCGC  GAATGG  CTC  ATTAAA  TCAGTTATGGTTCCTTAGAT  CGTACC  CACA  TTTA  CTTGGATAACTGTGG  TAATT  CTAGAGCTAATACATG  CAAACCAGA  GTTCCGACCA  GAGA  TGGAAGGAAC  GCTT TTATT    AGATCAAAACCAAT  CGGTGG-CGGG--  tt--cg  --CTCGT-CCACCG  TTTACCTTGGTGACTCTG  AATAA  CTTTGTGCTGA  TCGCACGGT  CTC-GC  ACCGGCGA  CGC  ATCTTTCAAATGTCTGC  CTTATCAACTGTCGATGGTAGG  TTCTGCG  CCTACCATGGTTGTAACGGG  TAA CGGGGAAT  CAGG  GTTCGATTCCG  GAG    A    GGGAGC  CTGAGAAACG  GCTACC  A  CATC  CAAG  GAAG  GCA  GCAGGCGC  GCAAA  TTACCCACTCCCG  GCA  CGGGGAGGTA  G  TGACGAAAA
PT16M_Thinodytes_sp_D0726_uvxyz                     ---  -----  ---  ---  -  -----  -  -----------  -  --------  -------------  --  ---------------  -------  -----------  ------  ---  ------  --------------------  ------  ----  ----  ---------------  -----  ----------------  ---------  ----------  ----  ----------  ---- -----    --------------  -------------  ------  --------------  ------------------  -----  -----------  ---------  ------  --------  ---  -----------------  ----------------------  -------  --------------------  --- --------  ----  -----------  ---    -    ------  ----------  ------  -  ----  ----  ----  ---  --------  -----  -------------  ---  ----------  -  ---------
PT16S_Cyrtogaster_vulgaris_R1314_10_uxyz            ---  -----  ---  ---  -  -----  -  -----------  -  --------  -------------  --  ---------------  -------  -----------  ------  ---  ------  --------------------  ------  ----  ----  ---------------  -----  ----------------  ---------  ----------  ----  ----------  ---- -----    --------------  -------------  ------  --------------  ------------------  -----  -----------  ---------  ------  --------  ---  -----------------  ----------------------  -------  --------------------  --- --------  ----  -----------  ---    -    ------  ----------  ------  -  ----  ----  ----  ---  --------  -----  -------------  ---  ----------  -  ---------
PT16S_Polstonia_pelagocorypha_D0493_uvxyz           ---  -----  ---  ---  -  -----  -  -----------  -  --------  -------------  --  ---------------  -------  -----------  ------  ---  ------  --------------------  ------  ----  ----  ---------------  -----  ----------------  ---------  ----------  ----  ----------  ---- -----    --------------  -------------  ------  --------------  ------------------  -----  -----------  ---------  ------  --------  ---  -----------------  ----------------------  -------  --------------------  --- --------  ----  -----------  ---    -    ------  ----------  ------  -  ----  ----  ----  ---  --------  -----  -------------  ---  ----------  -  ---------
[truncated: 3,517,022 more chars]
