# Supplementary material for: A Molecular Phylogeny of the Chalcidoidea (Hymenoptera)
Source: PubMed Central journal article supplement (PMC3207832; doi:10.1371/journal.pone.0027023), 2011-11-03
Supplement: pone.0027023.s001.pdf [file pone.0027023.s001.pdf]

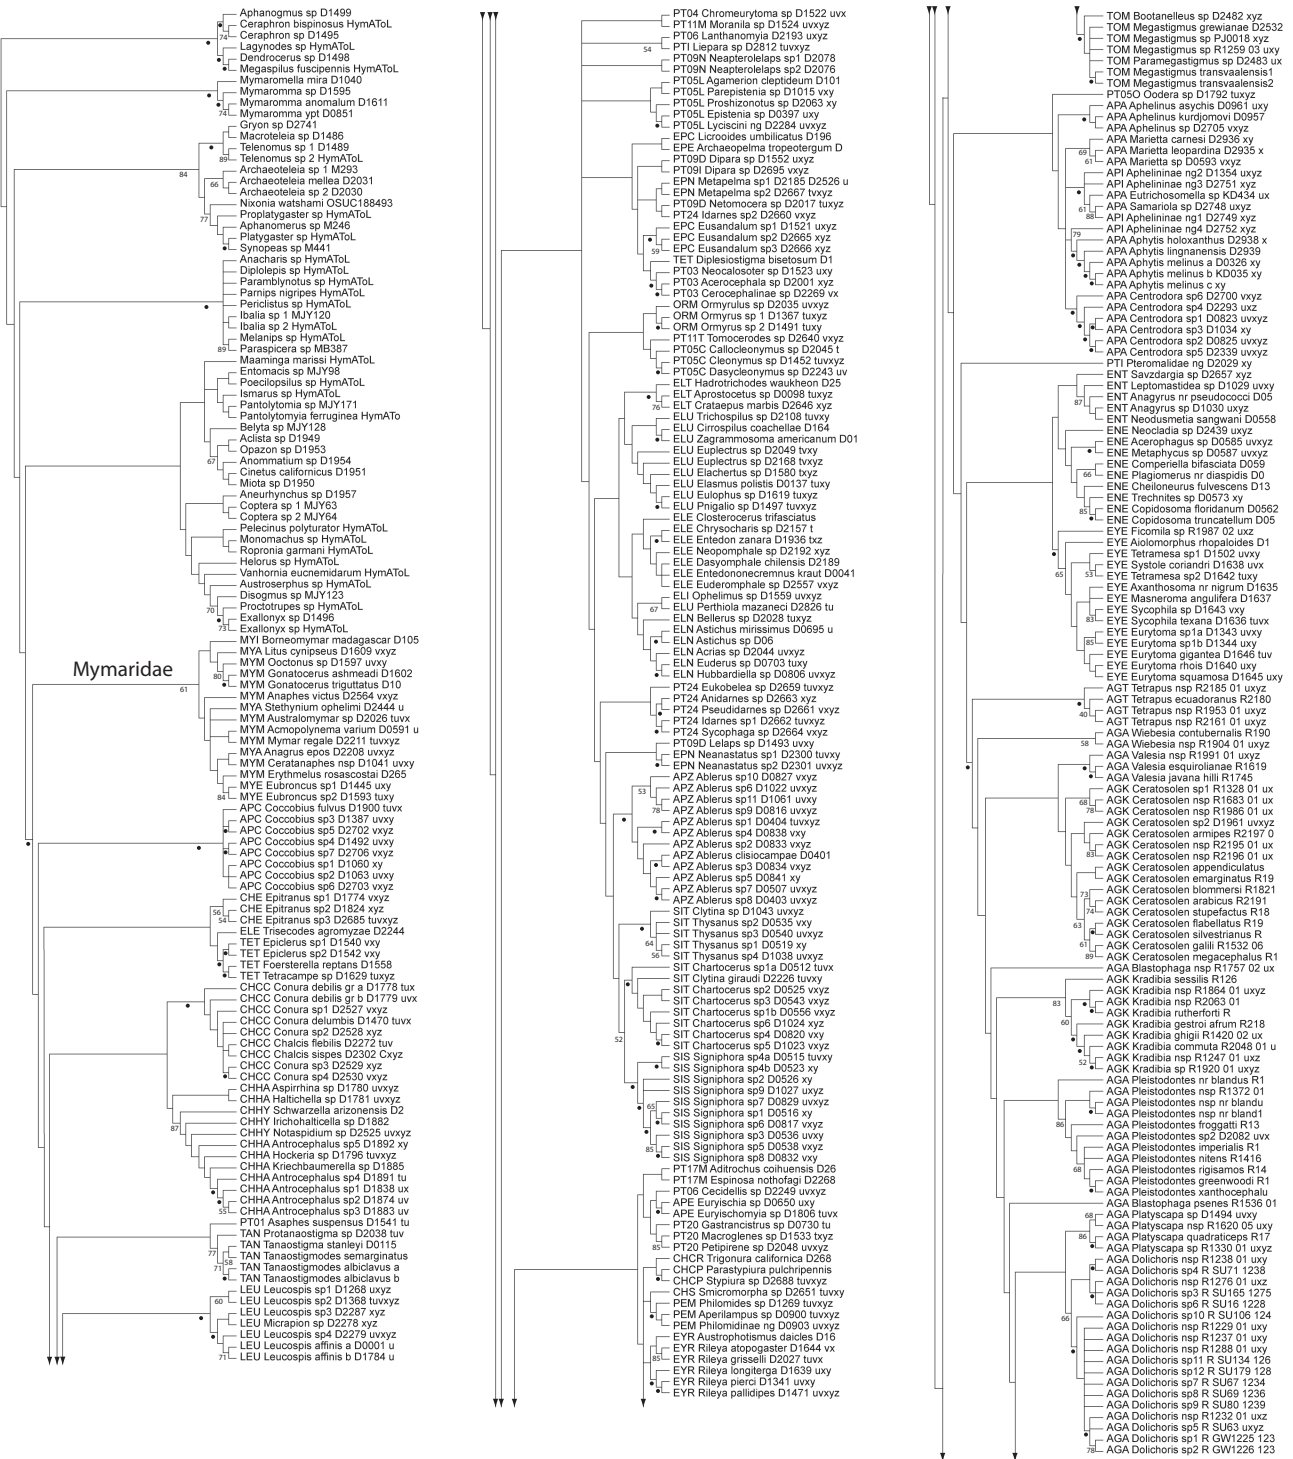

**Supplementary Figure 1.** Parsimony analysis of SSME dataset using TNT (31,607 steps; r.i. 0.62, strict consensus of >10,000 trees). Bootstrap values plotted to nodes with values greater than 95% represented by dot.
